# Supplementary material
Source: Research Square preprint supplement (doi:10.21203/rs.3.rs-8790511/v1)

**Supporting Information**

Transcriptomic and Functional Responses of Human Airway Cells to Vaped ∆8-THC and its Oxidation Product ∆8-THCQ

Charlotte A. Love1, Hye-Young H. Kim2, Julia E. Rager1,3, Keri A. Tallman2,Kevin D. Schichlein1, Ned A. Porter2, and Ilona Jaspers1*

1Curriculum in Toxicology & Environmental Medicine, Center for Environmental Medicine, Asthma, and Lung Biology and 3Department of Environmental Sciences and Engineering, The University of North Carolina at Chapel Hill, Chapel Hill, North Carolina 27599, United States

2Department of Chemistry and Vanderbilt Institute of Chemical Biology, Vanderbilt University, Nashville, Tennessee 37235, United States

*Corresponding author: Ilona Jaspers – Curriculum in Toxicology & Environmental Medicine, Center for Environmental Medicine, Asthma, and Lung Biology, and Department of Pediatrics, The University of North Carolina at Chapel Hill, 116 Manning Drive, University of North Carolina at Chapel Hill, NC 27599-7310, USA; Email: [ilona_jaspers@med.unc.edu](mailto:ilona_jaspers@med.unc.edu)

| **Page** | **Contents** |
| --- | --- |
| S2-S6 | Supplemental materials and methods. |
| S7 | Figure E1. Principal component analysis 16HBE cells. |
| S7 | Figure E2. Heatmap and volcano plot for the 24-hour ∆8-THCQ exposure in 16HBE cells. |
| S7 | Figure E3. Multidimensional scaling (MDS) analysis for the vaped ∆8-THC transcriptomic analysis in HBECs. |

Supplemental tables are available in a separate Microsoft Excel document.

**Supplemental Materials and Methods**

*Chemical Analysis of Commercially Available Vaping Products*

*Vaped Condensate Preparation.* Commercially available ∆8-THC vaping products were purchased either from a local shop (distillates and disposables) or from an online vendor (juices). A detailed description of the products chosen including advertised concentrations, additives, and devices used can be found in Table 1. To minimize changes in chemical composition from long-term storage, products were used for chemical analysis and *in vitro* experiments within four weeks of purchase. Methods used for vaped condensate generation have been published by us previously (26, 27) and were originally adapted from methods designed for e-cigarette aerosol sampling (30). Briefly, a peristaltic pump was connected to tubing (16 cm) leading to a series of trimmed pipette tips to condense the sample in a collection tube which is located at the end of the tubing and is fitted with vented parafilm. All products were directly connected to the 16 cm tubing for sampling, except the Stiizy disposable device for which a 3D printed adaptor fitted with a silicone insert was made (a detailed description of custom adaptors and images of the adaptors can be found in our previous publication (27). To generate vaped condensates, liquid was collected from 20 5-second puffs with 1-minute rests. To compare vaped condensates to non-vaped samples, a duplicate was purchased for each product at the same time which was never vaped or heated. Directly following vaped condensate collection, vaped liquids and non-vaped samples were weighed and frozen at -80 °C.

*Quantitative Cannabinoid Analysis of ∆8-THC Products by LC/MS-MS.* Methods of LC-MS analysis of vaped and non-vaped samples for quantitative analysis of cannabinoids have been previously described in detail (27). Briefly, *d9*-CBD was used as the internal standard in addition to standards of CBD, ∆9-THC, ∆8-THC, CBDA, ∆9-THCA, and CBN. Condensates were diluted in methanol (1 mg/mL), and d9-CBD (10 µL) was added before analysis. Samples (10 µL) were injected into an ultra-performance liquid chromatography (UPLC) system equipped with a C18 column, using a CH3CN:MeOH:H2O (40:40:20, 0.01% formic acid) mobile phase at 40°C. The run time was 15 minutes with a 300 µL/min flow rate. MS analysis was performed on a tandem mass spectrometer with electrospray ionization in positive ion mode, using selected reaction monitoring (SRM). MS parameters, including spray voltage, capillary temperature, and gas pressures, were optimized using CBD. Collision energies and SRMs were determined for each compound. Response factors relative to *d9*-CBD were used for quantitation. ∆9-THCQ was measured but was not detected in any products.

*Analysis of Non-Cannabinoid Constituents in ∆8-THC Products by GC-MS.* Methods used here for identification of the relative abundance of additives and contaminants in ∆8-THC vaping products have also been previously described in detail (27). Non-vaped liquids and vaped condensates were analyzed. Briefly, samples (1 mg/mL in methanol) were analyzed on a ThermoFisher Exactive GC mass spectrometer with electron impact ionization (70 eV). The mass range was 50–400 m/z, with a resolution of 60,000. Separation was performed on a DB-5 column (30 m × 0.25 mm × 0.25 µm) under the following conditions: 100°C for 1.5 min, ramped at 30°C/min to 300°C, held for 12 min (total 20 min). A 1 µL injection with a 1:100 split ratio was used, with helium at 1.5 mL/min. Compounds were identified using the NIST Mass Spectral Library (v2.4, 2020) and filtered based on high-resolution filtering scores (>91), matching calculated molecular and NIST theoretical molecular mass, consistent retention time between samples, presence of reference peak, and good mass spectra quality while matrixes and unknowns were excluded.

*Cell Culture and Differentiation*

*Culture of 16HBE Cells.* Cells were cultured from the SV-40 transformed human bronchial epithelial cell line 16HBE14 (16HBE cells) as described previously (27, 31). Cells were grown in minimum essential medium (MEM) Eagle (Sigma Life Sciences, St. Louis, MO) with 10% fetal bovine serum (Omega Scientific Inc., Tarzana, CA) and 1% Gibco penicillin-streptomycin (ThermoFisher Scientific, Waltham, MA) on T-75 culture plates (Corning Life Sciences, Corning, NY) coated in collagen (Advanced BioMatrix, Carlsbad, CA) and were incubated at 37°C with 95% humidity and 5% carbon dioxide.

*Culture of human primary bronchial epithelial cells (HBECs).* Expansion, differentiation, and maintenance of from human donors have been previously described (27, 32, 33). HBECs were obtained from the UNC Marsico Lung Institute Tissue Procurement and Cell Culture Core and donor information is available in Table E1. Culturing of HBECs was performed as described in detail previously (26, 27). Briefly, HBECs were expanded in Pneumacult-Ex Plus on collagen-coated T-75 flasks, then seeded onto 12 mm transwells for differentiation at air–liquid interface in Pneumacult-ALI medium. Cultures were maintained at 37 °C with 5% CO₂ and 95% humidity, washed weekly, and differentiated for at least 28 days until fully ciliated.

*In-vitro Exposures*

*16HBE Cell Exposures.* ∆8-THC and ∆8-THCQ were purified and synthesized respectively for 16HBE exposures using methods previously published by our team (26). Briefly, ∆8-THC distillate was purified using column chromatography with 10% EtOAc/hexanes. A solution of Δ8-THC (0.12 g, 0.38 mmol) in CH3CN (5 mL) and H2O (1 mL) was treated with stabilized 2-iodoxybenzoic acid (SIBX, 0.24 g, 0.84 mmol), resulting in a color change to orange. After 1 hour, the reaction was quenched by dilution with EtOAc, followed by sequential washes with NaHCO₃ and brine, then dried over MgSO₄. The final product, a red oil (81 mg, 65% yield), was purified again via column chromatography under the same conditions. For exposures, 16HBE cells (n = 3 passage numbers) were grown to 90% confluency in 6-well plates (Corning Life Sciences) (seeding density of 3 x 105 cells/well). 16HBEs were then exposed to ∆8-THC (8.5 µM), ∆8-THCQ (8.5 µM), or DMSO vehicle control in 2 mL MEM for 12 or 24 hours. Directly following exposures, 16HBE cells were lysed in 600 µL RNA Lysis Buffer with 2-Mercaptoethanol (10%) (Invitrogen, Waltham, MA) and stored at -80 °C.

*HBEC Exposures.* Fully differentiated primary HBECs (n = 4 donors, Table E1) were exposed to the same 6 commercially available ∆8-THC vaping products (Table 1) used for chemical analysis or a 40/60 propylene glycol/vegetable glycerin (PG/VG) vaping control using the UNC Vaping Product Exposure System (VaPES) (34). Details of the devices used with each product can also be found in Table E1. For the Stiizy disposable product, a new 3D-printed mouthpiece and silicone insert were made to accommodate the different shape of the mouthpiece (34). We have previously shown deposition with VaPES to be 49.5 ± 2.75 µg/cm2 per puff on a 12 mm transwell (34). Two replicate wells per donor were exposed to each vaping product. HBECs were exposed to a total of 10 3-second puffs (2 L/min puffs with 10-minute rests to allow for complete sedimentation of the aerosol). Live cell imaging was performed before exposure and after 5 and 10 puffs (see methods on live cell imaging and cilia analysis below). After 10 puffs, the basolateral medium was removed, and cells were lysed in 300 µL RNA Lysis Buffer with 2-Mercaptoethanol (10%) (Invitrogen, Waltham, MA) and stored at -80 °C.

*RNA-Sequencing Analysis*

*RNA-Sequencing.* RNA was isolated from 16HBE cells and HBEC lysates using a PureLink RNA Mini Kit (Invitrogen) and all manufacturer’s instructions were followed. For HBECs exposed to vaped ∆8-THC, two replicate wells were used per donor and product for RNA-sequencing analysis. Power analysis using the RNASeqPower package in R, based on conservative dispersion estimates from similar previous RNAseq datasets of 16HBEs and HBECs (27) (BCV ≈ 0.103 and 0.165 respectively, median read depth 484 and 303 counts/gene respectively), indicates that n = 3/4 biological replicates provides >95% power to detect a Log2FC ≥ 1 (fold-change ≥ 2) at an FDR of 0.05.Following preliminary quality assessment of RNA with a CLARIOstar and LVis plate (BMG LABTECH, Cary, NC), RNA was sent to GENEWIZ (Azenta Life Sciences, South Plainfield, NJ) where quality was further assessed with RNA ScreenTape Analysis and a TapeStation (Agilent, Santa Clara, CA). 16HBE cell samples were sequenced with an Illumina (San Diego, CA) Hi-Seq (2x150bp), and HBEC samples were sequenced on an Illumina Novaseq X Plus (2x150bp). Sequence reads were trimmed and potential adapter sequences and nucleotides with poor quality were removed with Trimmomatic (v0.36). Reads were mapped to the Homo sapiens GRCh38 with ERCC genes reference genome (ENSEMBL) (35) with the STAR aligner (v2.5.2b) (36) (16HBEs had 1,763,001,319 total reads and 35.56 mean quality score, HBECs had 1,266,194,279 total reads and 38.54 quality score). The Subread package (v1.5.2) (37) was then used to calculate unique gene hit counts (only unique reads falling within exon regions were counted).

*Differential Expression Analysis.* For the RNA-sequencing dataset of 16HBE cells exposed to ∆8-THC and ∆8-THCQ, the DESeq2 package (v1.46.0) was used for differential expression analysis (38). This allowed for direct comparison with a previous dataset of 16HBEs exposed to CBD and CBDQ (27). Genes were filtered to keep only those with counts of at least 10 in three or more samples. Data were then visualized by principal component analysis (PCA) with DESeq2 (v1.42.1). Within each time point (12 or 24 hours), all groups were processed together, and the contrast function was applied to derive relevant comparisons. Adjusted p-values were calculated using the Wald test, following the standard approach in the DESeq2 package (38). Differential expression analysis of RNA-sequencing data from HBECs exposed to vaped ∆8-THC was conducted using limma-voom (v3.62.2) (39) to allow for adjustment for inter-individual donor effects in HBECs and dose-response analysis. Genes with a maximum CPM < 4 across all samples were removed. For all analyses in limma-voom, the duplicateCorrelation function was used to account for technical replicates by estimating within-sample correlation, ensuring the linear model adjusts for non-independence and captures true biological variation. A model matrix was constructed to assess ∆8-THC product effects while adjusting for donor variability as a fixed effect. Following model construction, the voom transformation was applied to estimate the mean-variance relationship of log-transformed counts, generating precision weights for each observation. A linear model was then fitted to the weighted expression data, followed by empirical Bayes moderation to calculate moderated t-statistics and differential expression (39). To visualize sample relationships and assess potential donor effects, we performed multidimensional scaling (MDS) on the normalized expression data and used the removeBatchEffect function from limma. Based on these results, donor was included as a fixed effect in the model matrix in all downstream analyses. MDS analysis also revealed distinct sample groupings, with distillates and disposables, juices, and the PG/VG control clustering separately. We therefore also performed analysis on these groupings and constructed a design matrix to model the effects of product type with donor as a fixed effect. Results from DESeq2 and limma-voom were visualized using ggplot2 (3.5.1) (40) for volcano plots, ComplexHeatmap (v2.22.0) (41) for heatmaps, and eulerr (v7.0.2) (42) for Euler plots. Finally, limma-voom was used to perform dose-response analysis of RNA-sequencing data using previously measured concentrations of ∆8-THC and ∆8-THCQ in the vaped condensates of each product. Dose-responsive genes were identified using empirical Bayes moderation, with ∆8-THC or ∆8-THCQ concentration modeled as a continuous variable and donor as a covariate to control for inter-individual variability. Linear models were fitted to normalized expression values to visualize dose-dependent trends. Throughout all analyses, differentially expressed genes were defined as having an adjusted p-value < 0.05 and log2 fold change ≥ +/- 1 (representing an absolute fold change of +/- 2).

*Pathway and Gene Set Enrichment Analysis.* Ingenuity Pathway Analysis (IPA; QIAGEN, Hilden, Germany; v24.0.2) (43) and Gene Set Enrichment Analysis (GSEA; Broad Institute, Cambridge, MA; v4.3.3) (44) were used for pathway and gene set enrichment analysis of RNA-sequencing data, respectively. IPA Tox analysis using expression log ratio was performed on differentially expressed genes (adjusted p-value < 0.05 and log2 fold change ≥ 1). Normalized counts were used as input for GSEA, and the analysis was performed using gene sets from the Molecular Signatures Database (MSigDB) Hallmarks (45), Gene Ontology (GO) (46, 47), and WikiPathways (48). All GSEA analysis parameters were standard except for permutation type (gene_set), which is recommended for sample sizes < 7. Gene sets with FDR < 5% were considered significantly enriched.

Weighted chemical correlation network analysis (WCCNA)

To relate patterns of ∆8-THC product chemistry to HBEC transcriptomic responses, we performed weighted chemical co-expression network analysis (WCCNA) (49, 50) adapted from the weighted gene co-expression network analysis (WGCNA) framework (51). The chemistry and RNA-sequencing datasets were matched, as the same commercial ∆8-THC products were used for chemical analysis and HBEC aerosol exposures. GC–MS and LC–MS peak areas were first imported, chemicals with zero signal across all samples were removed, and remaining compounds were z-score normalized across samples. Product level chemistry profiles were then expanded to donor × product combinations so that each of the 24 samples (products A–G) had a matched vector of chemical abundances. For HBEC RNA-seq data, raw counts were collapsed across technical replicates and filtered by median expression (≥25 counts). Using DESeq2 (v1.48.2), we next compared each ∆8-THC product (A–G) to the PG/VG control (H) and retained genes with adjusted p-value < 0.05 and absolute fold-change ≥ 1.5 in at least three product-versus-control comparisons, yielding 2,073 genes. Variance-stabilizing transformation (VST) was applied to this filtered gene set to generate normalized expression values for correlation analyses.

Chemical networks were constructed using WGCNA in R (v1.73). A soft-thresholding power (β = 9) was chosen based on scale-free topology and mean connectivity diagnostics (52). An unsigned adjacency matrix was calculated from Pearson correlations and converted to a topological overlap matrix (TOM). Hierarchical clustering of chemicals followed by dynamic tree cutting (minimum module size = 3; merge cut height = 0.1) identified modules of chemicals with abundance distributions that co-occurred (i.e., were co-modulated) across vaping samples. Module eigengenes were computed as the first principal component of each module, capturing the majority of the variance in a data reduced format to carry forward in downstream statistics. Module eigengenes were then correlated with VST-normalized gene expression values using Pearson correlations and corresponding Student asymptotic p-values. For visualization, genes were ranked within each module by |kME| (correlation with the module eigengene), and the top five or ten genes were selected for representative plotting. Heatmaps were produced with ComplexHeatmap (v2.24.1) and circlize (v0.4.16); line plots and composite figures were made in ggplot2 (v4.0.0) and patchwork (v1.3.2).

*Live Cell Imaging and Cilia Analysis*

As detailed previously, primary HBECs (n = 4 donors, 2 replicate wells/donor and treatment, Table E1) were exposed to 10 3-sec puffs (2 L/min) of 6 different commercially available ∆8-THC products or a 40/60 propylene glycol/vegetable glycerin control. Live cell ciliary analysis measurements were performed before exposure, after 5 puffs, and at the end of the 10-puff exposure. Measurements were performed using a custom air-liquid interface (ALI) chamber mounted on a Nikon Eclipse C1si inverted microscope equipped with a 10 x 0.45 NA CFI Plan Apo λ objective lens (Nikon, Melville, NY). Cell plates containing HBECs on transwell inserts were placed in the custom ALI chamber mounted on the confocal microscope stage top which was equipped to maintain cells at 37 °C with 5% CO2 and ≥ 95% relative humidity. Images were captured with a high-speed digital Andor Zyla cMOS (Andor Technology, Belfast, Northern Ireland) camera set for 2 x 2 binning with an exposure time of 10 ms captured at a frame rate of 100 FPS (300 total frames). For each donor, exposure, and timepoint, ciliary analysis measurements were evaluated for 4 different 512 x 512 areas over 2 replicate transwell cultures. Images were analyzed with Cilia-X software (Epithelix, Plan-les-Ouates, Switzerland) using a frequency range of 2-15 Hz and a whole-field analysis power threshold of 2 million to obtain cilia beat frequency (CBF) and percent active area. Data from replicate areas and wells from the same donor and treatment were averaged for further analysis.

*Statistical Analysis of Chemical Quantitation and Ciliary Function*

All data were analyzed in R (v4.4.3) using the package rstatix (v0.7.2). Changes in the mean concentration of ∆8-THCQ before and after vaping for distillate and disposable products were evaluated with a paired t-test. For analysis of cilia beat frequency and cilia percent active area, data were evaluated for normalcy with a Shapiro-Wilk test and subsequently analyzed by one-way ANOVA followed by Tukey’s post hoc test.

*Data Availability*

Raw GC-MS chemical analysis data as well as raw read counts and differential expression analysis of RNA-Seq are available at <https://dataverse.unc.edu/dataset.xhtml?persistentId=doi:10.15139/S3/GUWP3K&version=DRAFT>. Code for RNA-Seq analysis is available at <https://github.com/UNC-CEMALB/Transcriptomic-and-Functional-Responses-of-Human-Airway-Cells-to-Vaped-8-THC-and-its-Oxidation...>

**Figure E1.** Principal component analysis 16HBE cells (n = 3 passage numbers) exposed to ∆8-THC (8.5 µM), ∆8-THCQ (8.5 µM), or vehicle control (8.5 µM equivalent) for (A) 12 or (B) 24 hours.


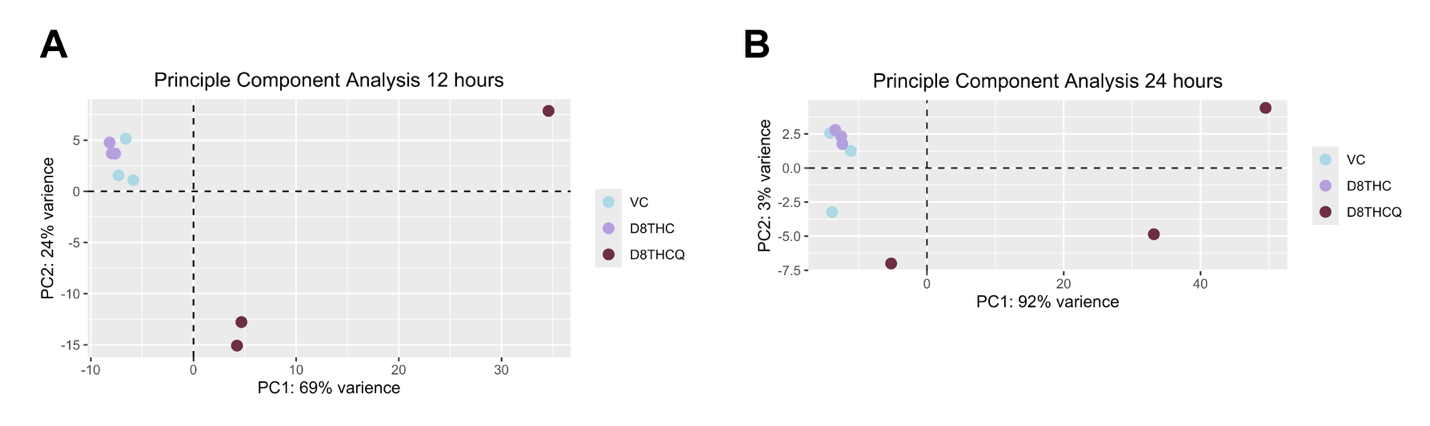


**Figure E2.** (A) Heatmap for the 24-hour exposure 16HBE cells (n = 3 passage numbers) and (B) volcano plot for the 24-hour ∆8-THCQ vs. vehicle control comparison.


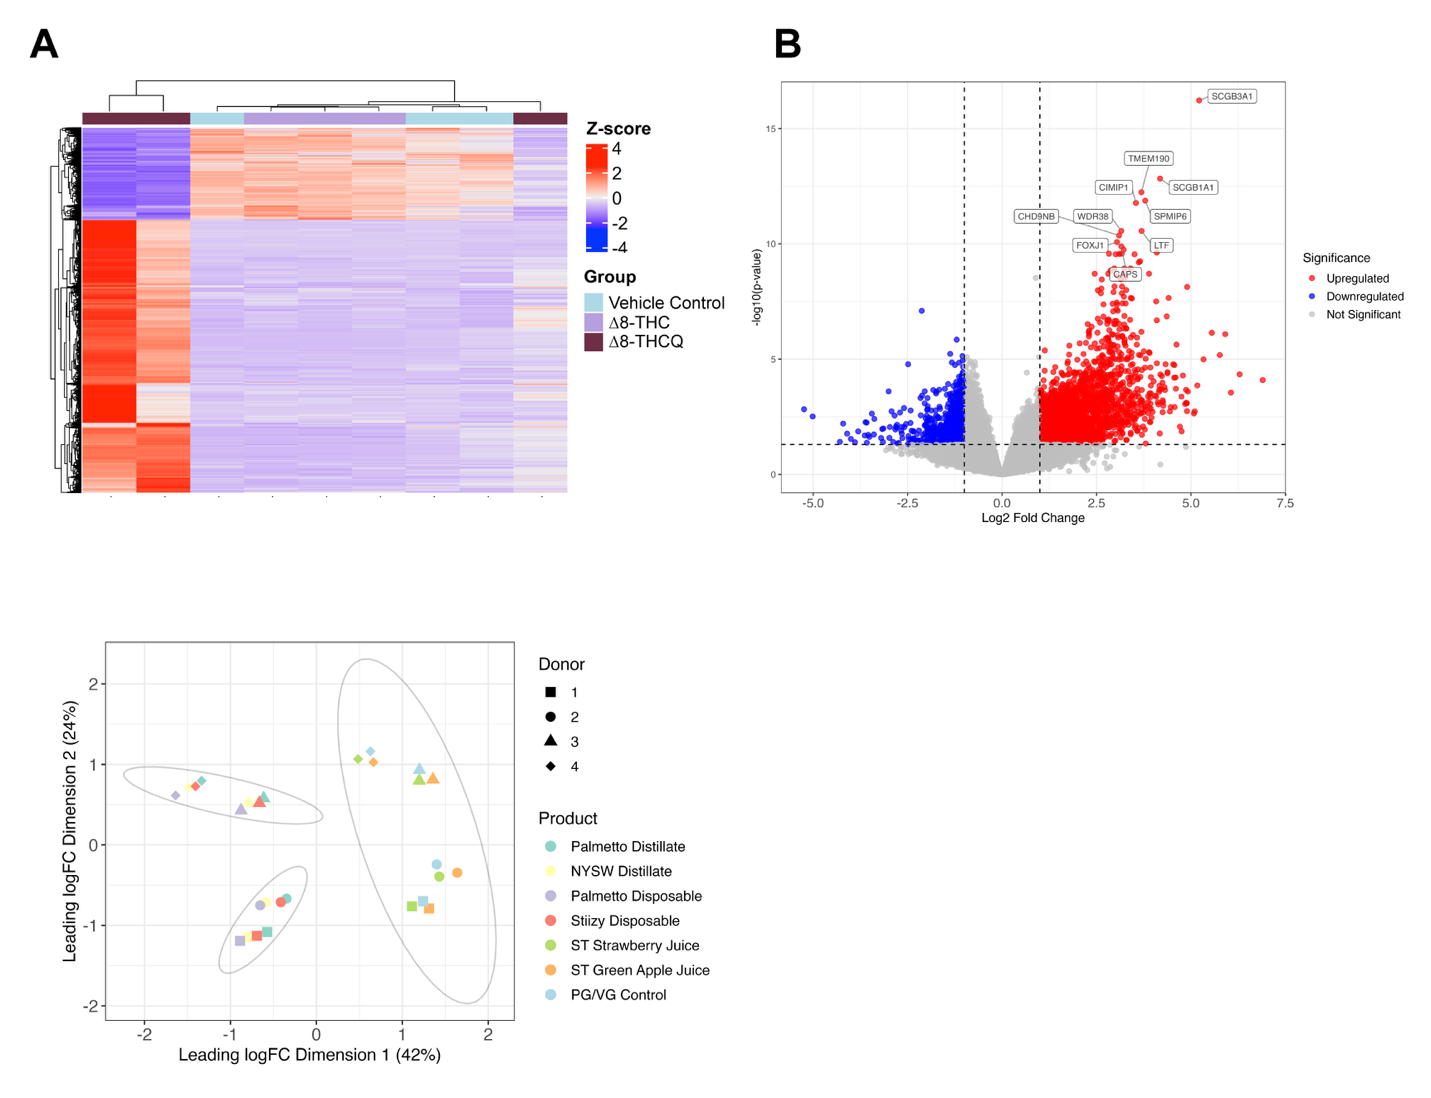


**Figure E3.** Multidimensional scaling (MDS) analysis for the transcriptomic analysis on primary HBECs (n = 4 donors, 2 replicate wells/donor, Table E1) exposed to the 6 commercially available ∆8-THC products (10 puffs) using the UNC Vaping Product Exposure System (VaPES).


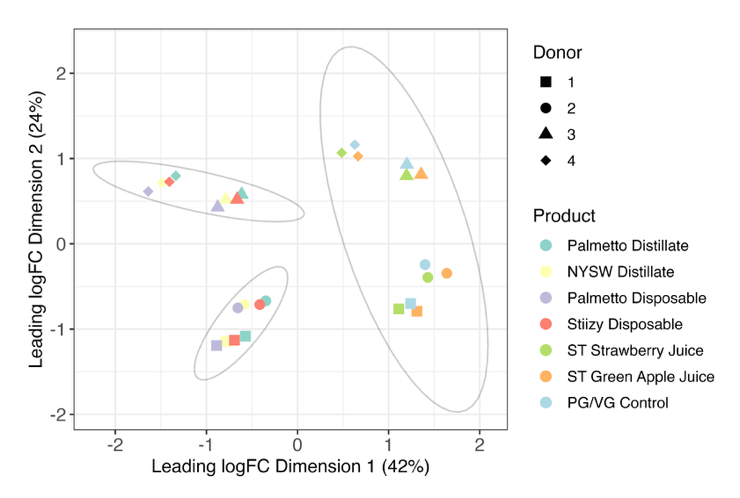

Supplement: Supplementary file 1 [file 1b0ea04d5b182bd9782edd1e.docx]
