# Supplementary material
Source: Research Square preprint supplement (doi:10.21203/rs.3.rs-8790511/v1)
Supplement: Supplementary file 2 [file 4d16f6f51c7792840a1b4b38.xlsx]

## Sheet: E1 Donor Info
Table E1. Demographic information for primary HBEC lung donors.
Donor	Age (year)	Sex	Race/Ethnicity	Smoking
1	33	Male	White	NS
2	30	Male	White	NS
3	34	Female	White	NS
4	37	Female	White	NS
NS = non-smoker.

## Sheet: E2 16HBE Genes
Table E2. Genes significantly altered in 16HBEs exposed to ∆8-THCQ versus the vehicle control (VC).
12 Hours					24 Hours
Probe	Symbol	padj	log2FoldChange		Probe	Symbol	padj	log2FoldChange
ENSG00000000938	FGR	0.00539444	2.13068		ENSG00000000460	FIRRM	0.0179998	-1.35582
ENSG00000000971	CFH	0.000194605	2.04815		ENSG00000000971	CFH	0.000214076	3.26478
ENSG00000004799	PDK4	0.0184677	2.31489		ENSG00000001617	SEMA3F	0.00346128	1.09556
ENSG00000004838	ZMYND10	3.23429e-18	2.32963		ENSG00000002330	BAD	0.000616059	1.56521
ENSG00000005379	TSPOAP1	0.000315209	2.34878		ENSG00000003056	M6PR	0.0466732	-1.32176
ENSG00000006210	CX3CL1	0.00184744	1.44673		ENSG00000003137	CYP26B1	0.0325676	-1.02853
ENSG00000007062	PROM1	2.10375e-05	1.7851		ENSG00000004059	ARF5	0.00146964	1.26122
ENSG00000007174	DNAH9	0.000155711	2.28119		ENSG00000004139	SARM1	0.0493433	-1.15328
ENSG00000007516	BAIAP3	0.00248418	1.21922		ENSG00000004468	CD38	0.00991176	1.98299
ENSG00000008226	DLEC1	2.58018e-10	2.73866		ENSG00000004700	RECQL	0.0212783	-1.62535
ENSG00000010610	CD4	0.00040928	2.56992		ENSG00000004779	NDUFAB1	0.00229781	1.09355
ENSG00000010626	LRRC23	8.57958e-06	1.04956		ENSG00000004799	PDK4	5.15997e-05	4.78654
ENSG00000012223	LTF	3.25041e-07	2.56341		ENSG00000004809	SLC22A16	0.000326724	3.27521
ENSG00000016402	IL20RA	0.000514685	2.03409		ENSG00000004838	ZMYND10	7.07838e-09	2.97549
ENSG00000021300	PLEKHB1	0.000179495	1.15388		ENSG00000004848	ARX	0.00121498	4.46557
ENSG00000025039	RRAGD	0.0287433	1.03093		ENSG00000005001	PRSS22	0.00119253	1.03682
ENSG00000026025	VIM	2.13521e-06	1.55551		ENSG00000005073	HOXA11	0.0492009	1.07092
ENSG00000026751	SLAMF7	0.0215695	2.80692		ENSG00000005075	POLR2J	0.00149479	1.35839
ENSG00000034239	CLXN	3.59381e-13	2.72722		ENSG00000005379	TSPOAP1	0.00040266	2.45851
ENSG00000047457	CP	0.00014809	1.94417		ENSG00000005483	KMT2E	0.0174796	1.40671
ENSG00000049540	ELN	0.00223853	2.75157		ENSG00000005844	ITGAL	0.00178492	4.89391
ENSG00000050555	LAMC3	0.0322138	-2.12762		ENSG00000006015	REX1BD	0.000124072	2.0534
ENSG00000053918	KCNQ1	0.0159343	1.78546		ENSG00000006210	CX3CL1	0.000265045	2.83069
ENSG00000057149	SERPINB3	3.4551e-12	2.08882		ENSG00000006638	TBXA2R	0.0155975	1.04877
ENSG00000059915	PSD	0.0261502	1.23825		ENSG00000006740	ARHGAP44	0.0100414	1.84403
ENSG00000064655	EYA2	6.0622e-09	2.07233		ENSG00000006747	SCIN	0.0139833	2.30372
ENSG00000064787	BCAS1	8.39776e-10	2.20922		ENSG00000007062	PROM1	8.20292e-07	2.91131
ENSG00000066185	ZMYND12	0.00770463	2.51586		ENSG00000007174	DNAH9	6.63397e-06	2.65233
ENSG00000067048	DDX3Y	0.000440441	2.30319		ENSG00000007372	PAX6	0.0336257	1.57435
ENSG00000070526	ST6GALNAC1	0.000106853	1.54968		ENSG00000007516	BAIAP3	3.87121e-05	1.57206
ENSG00000073737	DHRS9	8.86676e-14	2.12623		ENSG00000007952	NOX1	0.0471539	1.80747
ENSG00000074410	CA12	0.0415272	1.0481		ENSG00000008018	PSMB1	0.00239701	1.18494
ENSG00000076258	FMO4	0.0172248	3.10659		ENSG00000008226	DLEC1	3.50093e-08	3.03429
ENSG00000076716	GPC4	7.811e-05	1.86132		ENSG00000008869	HEATR5B	0.00252753	-1.04751
ENSG00000077327	SPAG6	1.56803e-10	2.46872		ENSG00000008952	SEC62	0.00151582	2.05574
ENSG00000080493	SLC4A4	0.0218288	1.94378		ENSG00000008988	RPS20	0.00102739	1.34876
ENSG00000080572	DNAAF6	4.67211e-05	3.59729		ENSG00000009413	REV3L	0.00403842	-1.01082
ENSG00000081803	CADPS2	0.0165974	2.62443		ENSG00000009780	FAM76A	0.0203348	1.23832
ENSG00000086548	CEACAM6	1.30938e-06	2.35012		ENSG00000010438	PRSS3	0.0345583	1.52678
ENSG00000087086	FTL	0.0305574	1.29735		ENSG00000010610	CD4	0.000840706	3.45582
ENSG00000088727	KIF9	0.00148162	1.10932		ENSG00000010626	LRRC23	1.56097e-05	1.73102
ENSG00000091181	IL5RA	0.00361215	2.6219		ENSG00000010704	HFE	0.0136654	1.321
ENSG00000092850	TEKT2	3.49083e-13	2.4883		ENSG00000010818	HIVEP2	0.000329219	-1.14832
ENSG00000093072	ADA2	0.00480804	2.5877		ENSG00000011332	DPF1	0.00375758	1.50121
ENSG00000094963	FMO2	0.00339152	3.18469		ENSG00000011376	LARS2	0.0432054	-1.08443
ENSG00000100218	RSPH14	3.0787e-05	2.15943		ENSG00000011478	QPCTL	0.00299511	1.28848
ENSG00000100918	REC8	0.00436703	1.06016		ENSG00000011566	MAP4K3	0.00104717	-1.22989
ENSG00000101222	SPEF1	1.90585e-14	2.29763		ENSG00000011590	ZBTB32	0.0385644	1.62851
ENSG00000101443	WFDC2	0.0453392	1.08257		ENSG00000012223	LTF	2.75746e-11	3.69084
ENSG00000102760	RGCC	7.76443e-08	2.24385		ENSG00000013288	MAN2B2	0.0120582	-1.06943
ENSG00000103253	HAGHL	0.00125646	1.4057		ENSG00000013725	CD6	0.00751958	2.75042
ENSG00000103269	RHBDL1	0.0137274	1.67359		ENSG00000015153	YAF2	0.000792993	1.94907
ENSG00000103534	TMC5	0.000102041	1.29158		ENSG00000015479	MATR3	0.00379555	-1.863
ENSG00000104237	RP1	1.40933e-06	2.56966		ENSG00000016402	IL20RA	0.00584372	2.23639
ENSG00000104490	NCALD	0.00608748	2.03578		ENSG00000017483	SLC38A5	0.0253194	2.09648
ENSG00000105479	ODAD1	0.000659776	1.56669		ENSG00000017797	RALBP1	0.0163957	1.12284
ENSG00000105519	CAPS	3.26722e-30	2.33341		ENSG00000019102	VSIG2	0.0213093	2.31844
ENSG00000105894	PTN	0.01371	2.50814		ENSG00000019995	ZRANB1	0.0390313	-1.48844
ENSG00000106541	AGR2	2.04552e-12	2.30733		ENSG00000021300	PLEKHB1	0.000501928	1.66183
ENSG00000107159	CA9	0.010826	2.54424		ENSG00000023839	ABCC2	0.0420632	-1.21061
ENSG00000107731	UNC5B	0.0436467	1.06643		ENSG00000023902	PLEKHO1	0.0435973	1.04999
ENSG00000108244	KRT23	9.42882e-05	1.12309		ENSG00000023909	GCLM	0.0108399	1.4336
ENSG00000108602	ALDH3A1	0.000110584	2.02194		ENSG00000024048	UBR2	0.00592384	-1.02958
ENSG00000108641	B9D1	0.0475426	1.11358		ENSG00000025039	RRAGD	0.00199637	1.95246
ENSG00000110777	POU2AF1	0.0249748	2.3733		ENSG00000025293	PHF20	0.00798746	1.26233
ENSG00000111834	RSPH4A	9.96746e-05	1.89076		ENSG00000025708	TYMP	6.44504e-05	2.32229
ENSG00000111913	RIPOR2	2.53165e-06	3.1624		ENSG00000025800	KPNA6	0.00253323	1.70348
ENSG00000112530	PACRG	8.37156e-08	2.62214		ENSG00000026025	VIM	0.021518	1.6638
ENSG00000112539	C6orf118	6.14197e-07	2.35951		ENSG00000026950	BTN3A1	0.0239518	-1.17683
ENSG00000112981	NME5	1.75719e-06	2.11622		ENSG00000028277	POU2F2	0.00520609	1.6575
ENSG00000113657	DPYSL3	0.0017446	2.08778		ENSG00000028310	BRD9	0.0016196	1.97153
ENSG00000114374	USP9Y	0.0483308	2.57308		ENSG00000032219	ARID4A	0.00158489	2.08235
ENSG00000114455	HHLA2	0.00771534	2.15098		ENSG00000034239	CLXN	6.36217e-10	3.61986
ENSG00000115257	PCSK4	0.00186498	1.31995		ENSG00000034510	TMSB10	0.000494484	1.88762
ENSG00000115423	DNAH6	0.000297027	1.92625		ENSG00000034677	RNF19A	0.000265045	-1.13331
ENSG00000115457	IGFBP2	1.22611e-43	2.29337		ENSG00000036448	MYOM2	0.0101769	1.48757
ENSG00000115461	IGFBP5	1.27141e-07	2.39652		ENSG00000037241	RPL26L1	0.00355346	1.03012
ENSG00000116032	GRIN3B	0.000304434	1.61977		ENSG00000037749	MFAP3	0.0049472	-1.24788
ENSG00000116667	C1orf21	0.00768431	2.27038		ENSG00000037965	HOXC8	0.00102905	2.3195
ENSG00000117477	CCDC181	0.00892899	1.46644		ENSG00000038219	BOD1L1	0.0272617	1.1456
ENSG00000117501	MROH9	0.0135249	2.16971		ENSG00000038382	TRIO	0.0041492	-1.42127
ENSG00000117983	MUC5B	0.0148138	2.32695		ENSG00000039139	DNAH5	0.00111812	1.30244
ENSG00000118257	NRP2	0.00130393	2.05802		ENSG00000040199	PHLPP2	0.0027995	-1.39762
ENSG00000118307	DNAI7	0.000701892	1.87671		ENSG00000040933	INPP4A	0.00412593	-1.00902
ENSG00000118407	FILIP1	0.033845	1.89004		ENSG00000041357	PSMA4	0.0101466	1.00576
ENSG00000118997	DNAH7	0.00556665	1.73033		ENSG00000041982	TNC	0.0143296	-1.12574
ENSG00000119147	ECRG4	0.00647554	2.71799		ENSG00000042753	AP2S1	0.000768829	1.64624
ENSG00000119630	PGF	0.0241166	1.09164		ENSG00000042980	ADAM28	0.0260395	1.14511
ENSG00000120055	C10orf95	6.73758e-05	1.66568		ENSG00000047457	CP	1.63571e-06	2.82552
ENSG00000120262	CCDC170	9.64846e-09	2.48171		ENSG00000048342	CC2D2A	0.000961791	1.78746
ENSG00000120594	PLXDC2	0.0395445	2.27918		ENSG00000048649	RSF1	0.00799178	1.4179
ENSG00000121316	PLBD1	0.029682	1.11517		ENSG00000049246	PER3	0.00727081	-1.19674
ENSG00000121552	CSTA	0.018027	1.38013		ENSG00000049540	ELN	0.000463833	3.92351
ENSG00000121858	TNFSF10	0.0274672	1.20101		ENSG00000050438	SLC4A8	0.0170707	1.09131
ENSG00000122694	GLIPR2	0.00157172	1.06821		ENSG00000051128	HOMER3	0.00111969	1.35576
ENSG00000122735	DNAI1	0.00167217	2.00575		ENSG00000051341	POLQ	0.00315432	-1.21381
ENSG00000124107	SLPI	0.00531192	1.44241		ENSG00000051523	CYBA	0.000894869	1.47428
ENSG00000124237	CIMIP1	4.52917e-22	2.45576		ENSG00000052126	PLEKHA5	0.000593373	-1.05464
ENSG00000125285	SOX21	0.0261502	1.75397		ENSG00000052344	PRSS8	0.00251007	1.07953
ENSG00000125968	ID1	0.0023055	1.04817		ENSG00000053254	FOXN3	0.00683135	1.28895
ENSG00000125999	BPIFB1	8.44967e-31	2.24658		ENSG00000053371	AKR7A2	0.00200658	1.01863
ENSG00000126759	CFP	0.0154828	2.61946		ENSG00000053372	MRTO4	0.00105042	1.6068
ENSG00000126838	PZP	0.0151271	2.83722		ENSG00000053438	NNAT	0.0150085	-1.43753
ENSG00000126861	OMG	4.31155e-10	1.89514		ENSG00000053747	LAMA3	0.0317672	-1.18819
ENSG00000127129	EDN2	2.29056e-10	3.99223		ENSG00000053918	KCNQ1	0.0178988	1.71935
ENSG00000128536	CDHR3	0.000335872	1.60999		ENSG00000054267	ARID4B	0.00595179	1.69294
ENSG00000128573	FOXP2	0.0156545	3.31998		ENSG00000054598	FOXC1	0.00299364	1.4959
ENSG00000128739	SNRPN	1.42335e-09	2.71949		ENSG00000055044	NOP58	0.00168162	1.91002
ENSG00000129295	DNAAF11	0.000174972	2.64253		ENSG00000057149	SERPINB3	1.34448e-05	2.67782
ENSG00000129514	FOXA1	1.84829e-11	2.43904		ENSG00000058063	ATP11B	0.00173693	-1.05048
ENSG00000129654	FOXJ1	3.71455e-13	2.21044		ENSG00000058272	PPP1R12A	0.0199502	1.17664
ENSG00000129824	RPS4Y1	2.71169e-07	2.17112		ENSG00000060339	CCAR1	0.00221878	1.87025
ENSG00000129951	PLPPR3	1.26814e-09	1.81228		ENSG00000060749	QSER1	0.000301805	-1.12879
ENSG00000130413	STK33	6.04096e-06	2.4497		ENSG00000061987	MON2	0.00130598	-1.2274
ENSG00000130592	LSP1	0.000108607	3.21977		ENSG00000062524	LTK	0.0466105	2.27994
ENSG00000130821	SLC6A8	1.18881e-07	1.08814		ENSG00000063177	RPL18	0.0014561	1.17389
ENSG00000130822	PNCK	0.047897	3.19102		ENSG00000063241	ISOC2	0.000618592	1.45441
ENSG00000131044	TTLL9	0.0438124	1.64624		ENSG00000063438	AHRR	0.0466408	-1.0508
ENSG00000131171	SH3BGRL	4.04088e-05	2.15595		ENSG00000064199	SPA17	0.0023363	1.28422
ENSG00000132122	SPATA6	0.000884285	2.40633		ENSG00000064225	ST3GAL6	0.00864099	1.68346
ENSG00000132205	EMILIN2	0.0319402	1.34662		ENSG00000064489	BORCS8-MEF2B	0.0141577	-1.97205
ENSG00000132386	SERPINF1	6.01855e-11	1.41419		ENSG00000064490	RFXANK	0.0010158	1.31401
ENSG00000132554	RGS22	1.15394e-05	2.87676		ENSG00000064655	EYA2	5.24525e-06	2.91031
ENSG00000132688	NES	0.0472609	2.16332		ENSG00000064787	BCAS1	3.78003e-06	2.9801
ENSG00000132821	VSTM2L	7.63413e-13	2.507		ENSG00000064999	ANKS1A	0.00870489	-1.01932
ENSG00000133115	STOML3	2.88398e-06	2.20708		ENSG00000065057	NTHL1	0.000517249	1.82293
ENSG00000133640	LRRIQ1	4.38673e-09	2.87062		ENSG00000065060	BLTP3A	0.00080376	-1.26313
ENSG00000133665	DYDC2	0.000884553	2.31512		ENSG00000065361	ERBB3	0.0255529	1.07294
ENSG00000133687	TMTC1	0.0432441	1.89056		ENSG00000065457	ADAT1	0.0156732	1.5707
ENSG00000134398	ERN2	3.79285e-05	2.34654		ENSG00000065548	ZC3H15	0.00547738	1.43728
ENSG00000134873	CLDN10	0.00188053	2.01519		ENSG00000065618	COL17A1	0.0079327	-1.0821
ENSG00000135116	HRK	0.0466445	1.3321		ENSG00000065621	GSTO2	0.0119794	1.73101
ENSG00000135205	CCDC146	0.00030032	1.49427		ENSG00000066084	DIP2B	0.000819077	-1.03647
ENSG00000135363	LMO2	0.0312176	1.08405		ENSG00000066185	ZMYND12	0.000122763	3.37863
ENSG00000135519	KCNH3	0.00414864	1.09795		ENSG00000066279	ASPM	0.00124689	-1.14792
ENSG00000135821	GLUL	4.37778e-11	2.0919		ENSG00000066379	POLR1H	0.00165485	1.35047
ENSG00000136059	VILL	3.87972e-05	1.02187		ENSG00000066827	ZFAT	0.0258735	-1.37255
ENSG00000136352	NKX2-1	0.0434502	2.35446		ENSG00000067048	DDX3Y	2.96871e-05	3.69937
ENSG00000136918	WDR38	4.2531e-14	2.27859		ENSG00000067082	KLF6	0.00816172	1.30596
ENSG00000137033	IL33	0.00148162	1.66819		ENSG00000067533	RRP15	0.0140819	1.236
ENSG00000137098	SPAG8	0.00465499	1.61724		ENSG00000068489	PRR11	0.000662406	2.50971
ENSG00000137449	CPEB2	0.0334164	1.24686		ENSG00000068650	ATP11A	0.000561486	-1.36027
ENSG00000137473	TTC29	1.14645e-05	2.79135		ENSG00000068796	KIF2A	0.00369786	-1.01315
ENSG00000137648	TMPRSS4	1.89787e-27	2.25666		ENSG00000068831	RASGRP2	0.00547368	1.49924
ENSG00000137691	CFAP300	0.000838951	1.13527		ENSG00000069011	PITX1	0.000283277	2.28248
ENSG00000137857	DUOX1	0.00509427	1.35695		ENSG00000069275	NUCKS1	0.00313469	1.91368
ENSG00000138131	LOXL4	0.00012494	1.68476		ENSG00000069482	GAL	0.00695631	1.09257
ENSG00000138400	MDH1B	0.000634694	1.68087		ENSG00000069535	MAOB	0.000747492	3.47101
ENSG00000138670	RASGEF1B	0.0469611	1.92241		ENSG00000069869	NEDD4	0.00238529	-1.27298
ENSG00000139537	CCDC65	0.0219442	1.16567		ENSG00000070081	NUCB2	0.00128563	1.71681
ENSG00000140057	AK7	1.1448e-09	1.95159		ENSG00000070526	ST6GALNAC1	0.000352968	2.73316
ENSG00000140254	DUOXA1	0.0017551	2.38977		ENSG00000070614	NDST1	0.0406842	-1.0839
ENSG00000140479	PCSK6	0.046642	1.5564		ENSG00000071082	RPL31	0.00111778	1.20112
ENSG00000140481	CCDC33	1.46924e-09	1.53846		ENSG00000071242	RPS6KA2	0.0192188	1.30035
ENSG00000140678	ITGAX	0.0225799	1.7231		ENSG00000071655	MBD3	0.00198004	1.12854
ENSG00000141294	LRRC46	4.59207e-14	1.84896		ENSG00000072042	RDH11	0.00601767	1.18278
ENSG00000141519	CCDC40	0.000236722	1.55353		ENSG00000072364	AFF4	5.74936e-05	-1.07512
ENSG00000141665	FBXO15	0.00360769	2.50983		ENSG00000072501	SMC1A	0.00228065	-1.06036
ENSG00000142347	MYO1F	0.000888668	1.61913		ENSG00000072818	ACAP1	0.000960999	2.26858
ENSG00000142609	CFAP74	0.0437471	1.67266		ENSG00000072840	EVC	0.00471463	-1.32398
ENSG00000142973	CYP4B1	2.37455e-22	2.01326		ENSG00000072858	SIDT1	0.0347583	2.25031
ENSG00000143365	RORC	0.0172248	2.56052		ENSG00000072954	TMEM38A	0.00396895	1.28724
ENSG00000143416	SELENBP1	8.72428e-09	1.76752		ENSG00000073282	TP63	0.0487403	1.41007
ENSG00000144476	ACKR3	1.2728e-05	2.36212		ENSG00000073464	CLCN4	0.0171455	-1.10474
ENSG00000144749	LRIG1	0.00917999	1.16504		ENSG00000073614	KDM5A	0.00835114	1.67522
ENSG00000145491	ROPN1L	4.34736e-18	1.78492		ENSG00000073737	DHRS9	2.12299e-07	2.80051
ENSG00000145687	SSBP2	0.0324562	1.4514		ENSG00000073803	MAP3K13	0.00334507	1.61317
ENSG00000146555	SDK1	0.0322138	1.92745		ENSG00000074071	MRPS34	0.000618592	1.61364
ENSG00000147065	MSN	4.23486e-05	1.80022		ENSG00000074410	CA12	0.0154679	1.78746
ENSG00000147642	SYBU	0.046642	1.77152		ENSG00000074657	ZNF532	0.0101769	-1.24269
ENSG00000148735	PLEKHS1	0.0357963	1.05737		ENSG00000075275	CELSR1	0.00298153	-1.12446
ENSG00000149021	SCGB1A1	1.20422e-10	3.06921		ENSG00000075673	ATP12A	0.00617588	1.20604
ENSG00000149527	PLCH2	0.00151146	1.32368		ENSG00000076685	NT5C2	0.0186976	-1.60421
ENSG00000150628	SPATA4	0.00519848	3.03009		ENSG00000076716	GPC4	0.00439957	2.77512
ENSG00000151023	ENKUR	0.000221409	1.51479		ENSG00000076944	STXBP2	0.00368227	1.00706
ENSG00000151338	MIPOL1	0.0271533	2.70274		ENSG00000077327	SPAG6	3.5758e-06	2.85192
ENSG00000151632	AKR1C2	1.11279e-05	2.35483		ENSG00000077616	NAALAD2	0.0196629	1.92465
ENSG00000151715	TMEM45B	4.38453e-15	2.39971		ENSG00000077684	JADE1	0.0280292	1.05159
ENSG00000152076	CCDC74B	0.000567202	1.43917		ENSG00000077713	SLC25A43	0.0429585	-1.16131
ENSG00000152611	CAPSL	6.29143e-11	2.4237		ENSG00000078124	ACER3	0.0062647	1.77176
ENSG00000152661	GJA1	0.00360693	4.27325		ENSG00000078177	N4BP2	0.000619691	-1.0949
ENSG00000152760	DYNLT5	0.000987912	2.54135		ENSG00000078687	TNRC6C	0.0205315	1.41939
ENSG00000152763	DNAI4	0.000522154	1.17688		ENSG00000079156	OSBPL6	0.00646928	1.20322
ENSG00000153132	CLGN	0.00993394	1.89866		ENSG00000079215	SLC1A3	0.00181547	-1.14586
ENSG00000153347	FAM81B	5.63361e-08	2.73507		ENSG00000079482	OPHN1	0.00301107	-1.43822
ENSG00000153446	C16orf89	0.00385108	2.37466		ENSG00000080200	CRYBG3	0.00168162	-1.87743
ENSG00000153789	CIBAR2	2.78546e-16	2.59579		ENSG00000080572	DNAAF6	1.51537e-05	4.09561
ENSG00000154080	CHST9	6.64385e-06	2.10167		ENSG00000080603	SRCAP	8.07907e-08	-2.12709
ENSG00000154099	DNAAF1	1.89893e-08	2.14571		ENSG00000080824	HSP90AA1	0.000778266	2.35055
ENSG00000154269	ENPP3	0.00431795	2.26653		ENSG00000081019	RSBN1	0.0153018	1.4924
ENSG00000154479	CFAP210	7.97859e-12	2.46226		ENSG00000081386	ZNF510	0.00134855	-1.34259
ENSG00000156206	CFAP161	0.0397982	1.7965		ENSG00000081665	ZNF506	0.000920673	2.99952
ENSG00000156966	B3GNT7	0.0265689	1.00445		ENSG00000081692	JMJD4	0.00218926	1.0177
ENSG00000157330	CFAP107	0.0119396	2.21683		ENSG00000081803	CADPS2	0.0165759	1.89616
ENSG00000157765	SLC34A2	1.89893e-08	1.95478		ENSG00000081853	PCDHGA2	0.0176325	-1.48765
ENSG00000157856	DRC1	5.15989e-16	2.4176		ENSG00000083099	LYRM2	0.0108128	1.09026
ENSG00000158113	LRRC43	3.83351e-07	2.00112		ENSG00000083807	SLC27A5	0.00124689	1.41695
ENSG00000158428	CATIP	7.03009e-07	2.75784		ENSG00000083845	RPS5	0.000808529	1.2491
ENSG00000159212	CLIC6	0.000107211	1.43205		ENSG00000083857	FAT1	0.00547368	-1.37689
ENSG00000159588	CCDC17	5.31468e-18	2.35958		ENSG00000084093	REST	0.0141781	1.31994
ENSG00000159625	DRC7	0.0172976	1.96465		ENSG00000084207	GSTP1	0.00106581	1.14474
ENSG00000159713	TPPP3	4.34642e-34	2.44853		ENSG00000084731	KIF3C	0.0160946	-1.12376
ENSG00000160180	TFF3	0.00357581	2.65091		ENSG00000084764	MAPRE3	0.00219353	1.07767
ENSG00000160188	RSPH1	4.03072e-16	1.97656		ENSG00000085117	CD82	0.00221535	1.36128
ENSG00000160401	CFAP157	2.14952e-06	1.05711		ENSG00000085224	ATRX	0.0041492	1.8246
ENSG00000160472	TMEM190	2.55751e-18	2.40958		ENSG00000085382	HACE1	0.000269803	-1.05473
ENSG00000160838	LRRC71	5.27034e-08	2.00622		ENSG00000085871	MGST2	0.00528684	1.10421
ENSG00000161055	SCGB3A1	0.047293	2.62626		ENSG00000086015	MAST2	0.0318413	-1.13563
ENSG00000161328	LRRC56	0.00106838	1.02946		ENSG00000086504	MRPL28	0.000735805	1.18654
ENSG00000161405	IKZF3	0.0184677	2.99938		ENSG00000086506	HBQ1	0.000290447	3.51544
ENSG00000161798	AQP5	1.05726e-09	2.00455		ENSG00000086548	CEACAM6	2.50388e-09	3.0541
ENSG00000162004	CCDC78	2.45708e-17	2.07994		ENSG00000086570	FAT2	0.0202061	1.52197
ENSG00000162040	HS3ST6	0.00014876	1.77034		ENSG00000086758	HUWE1	0.00122693	-1.10858
ENSG00000162148	SAXO4	3.19928e-05	1.769		ENSG00000087086	FTL	6.39137e-06	1.7751
ENSG00000162543	UBXN10	4.94822e-05	1.90828		ENSG00000087250	MT3	0.00753907	2.82806
ENSG00000162571	TTLL10	0.00013091	1.88952		ENSG00000087303	NID2	0.0371902	-1.58532
ENSG00000162598	C1orf87	1.11677e-05	2.17446		ENSG00000087494	PTHLH	0.00083701	1.71726
ENSG00000162599	NFIA	0.000685122	1.50409		ENSG00000087884	AAMDC	0.00101644	1.60368
ENSG00000162643	DNAI3	0.000162344	2.15349		ENSG00000088002	SULT2B1	0.0021287	1.26969
ENSG00000162814	SPATA17	6.72093e-05	2.03066		ENSG00000088205	DDX18	0.00880154	1.44891
ENSG00000162896	PIGR	2.99721e-08	1.97936		ENSG00000088367	EPB41L1	0.00668491	-1.00602
ENSG00000162949	CAPN13	0.0135249	2.63926		ENSG00000088386	SLC15A1	0.0478213	1.4055
ENSG00000163040	CCDC74A	1.06583e-08	1.57893		ENSG00000088727	KIF9	0.00313469	1.71631
ENSG00000163060	TEKT4	0.00608748	2.35946		ENSG00000088812	ATRN	0.0228187	-1.07914
ENSG00000163071	SPATA18	2.52266e-09	2.17371		ENSG00000089048	ESF1	0.000866159	2.14881
ENSG00000163075	CFAP221	1.17745e-06	2.54594		ENSG00000089101	CFAP61	0.00358781	2.5245
ENSG00000163359	COL6A3	0.000948422	1.92049		ENSG00000089157	RPLP0	0.000752274	1.07629
ENSG00000163453	IGFBP7	5.12772e-06	1.09765		ENSG00000089220	PEBP1	0.000482769	1.81913
ENSG00000163576	EFHB	3.08685e-05	2.53933		ENSG00000089356	FXYD3	0.000628618	1.29968
ENSG00000163596	ICA1L	0.035124	1.31882		ENSG00000089505	CMTM1	0.0258602	-1.10934
ENSG00000163879	DNALI1	3.4551e-12	2.23002		ENSG00000089723	OTUB2	0.0152344	-1.76908
ENSG00000163885	CFAP100	8.54519e-08	2.77565		ENSG00000090054	SPTLC1	0.0420114	-1.20837
ENSG00000163959	SLC51A	0.0286049	1.20929		ENSG00000090061	CCNK	0.0106019	-1.76893
ENSG00000163993	S100P	0.000267791	1.58412		ENSG00000090266	NDUFB2	0.00165738	1.25163
ENSG00000164099	PRSS12	0.000696769	2.13385		ENSG00000090339	ICAM1	0.0464301	-1.3449
ENSG00000164675	IQUB	0.0065599	2.23434		ENSG00000090376	IRAK3	0.0228697	1.83675
ENSG00000164687	FABP5	0.00396615	1.147		ENSG00000090382	LYZ	0.0117353	2.25086
ENSG00000164972	SPMIP6	4.09019e-26	2.82641		ENSG00000090470	PDCD7	0.00168337	1.4731
ENSG00000165084	C8orf34	0.0130333	3.21123		ENSG00000090621	PABPC4	0.0181524	1.22484
ENSG00000165092	ALDH1A1	6.432e-15	1.87536		ENSG00000090932	DLL3	0.00256884	1.58135
ENSG00000165171	METTL27	0.000149225	1.5095		ENSG00000090971	NAT14	0.00111733	1.33864
ENSG00000165309	ARMC3	7.0087e-05	2.00524		ENSG00000090975	PITPNM2	0.0226819	-1.23997
ENSG00000165695	AK8	1.43901e-07	2.08454		ENSG00000091073	DTX2	0.00139455	1.08144
ENSG00000165698	SPACA9	0.00014809	1.19229		ENSG00000091181	IL5RA	0.000662351	2.90361
ENSG00000165949	IFI27	6.2883e-09	1.70658		ENSG00000091262	ABCC6	0.00738267	1.74024
ENSG00000166246	DNAAF8	2.61515e-06	1.98034		ENSG00000091986	CCDC80	0.0188136	1.13356
ENSG00000166592	RRAD	6.17138e-26	1.87508		ENSG00000092439	TRPM7	5.77404e-05	-1.00662
ENSG00000166596	CFAP52	0.0125007	1.33705		ENSG00000092841	MYL6	0.000902968	1.36247
ENSG00000166828	SCNN1G	0.0140141	2.38348		ENSG00000092850	TEKT2	3.79011e-08	3.18507
ENSG00000166959	MS4A8	5.24952e-13	2.18938		ENSG00000092853	CLSPN	0.00184811	1.98929
ENSG00000167094	TTC16	3.73462e-06	4.02282		ENSG00000092871	RFFL	0.0149283	-1.22172
ENSG00000167216	KATNAL2	0.0154872	1.57484		ENSG00000093072	ADA2	4.58468e-06	3.74978
ENSG00000167653	PSCA	0.0324562	1.29632		ENSG00000093134	VNN3P	0.0324622	1.71892
ENSG00000167741	GGT6	0.000240298	1.6555		ENSG00000094755	GABRP	0.0408626	1.16578
ENSG00000167757	KLK11	0.000373537	1.73643		ENSG00000095002	MSH2	0.00441356	-1.04908
ENSG00000167858	TEKT1	4.19069e-17	2.29132		ENSG00000095485	CWF19L1	0.00804198	1.24351
ENSG00000168350	DEGS2	1.66486e-05	1.4111		ENSG00000095564	BTAF1	0.00079462	-1.30268
ENSG00000168405	NA	2.70922e-06	1.67136		ENSG00000095951	HIVEP1	0.0167049	-1.44448
ENSG00000168447	SCNN1B	1.75719e-06	1.89204		ENSG00000096070	BRPF3	0.0194293	-1.10175
ENSG00000168589	DYNLRB2	6.90515e-06	2.11403		ENSG00000096093	EFHC1	0.00151222	1.07182
ENSG00000168658	VWA3B	7.03009e-07	2.25472		ENSG00000096433	ITPR3	0.0195345	-1.55143
ENSG00000168899	VAMP5	0.0292827	1.49037		ENSG00000099139	PCSK5	0.0108807	2.003
ENSG00000169064	ZBBX	7.77234e-05	2.28537		ENSG00000099260	PALMD	0.00295991	2.99883
ENSG00000169126	ODAD2	0.000344405	1.72217		ENSG00000099337	KCNK6	0.00168095	1.95594
ENSG00000169314	C22orf15	7.40844e-07	2.13983		ENSG00000099377	HSD3B7	0.0018302	1.46191
ENSG00000169550	MUC15	0.00361215	2.10431		ENSG00000099385	BCL7C	0.00119293	1.2503
ENSG00000170231	FABP6	0.0086054	2.38226		ENSG00000099624	ATP5F1D	4.02382e-05	2.57923
ENSG00000170324	FRMPD2	0.0456812	2.07016		ENSG00000099795	NDUFB7	7.04566e-05	2.13723
ENSG00000170482	SLC23A1	0.00266667	1.29635		ENSG00000099800	TIMM13	0.000446658	1.66186
ENSG00000170577	SIX2	9.21673e-06	1.90731		ENSG00000099804	CDC34	0.00123294	1.12338
ENSG00000170786	SDR16C5	0.00509427	2.05242		ENSG00000099840	IZUMO4	0.00487772	1.42372
ENSG00000171119	NRTN	0.0429822	2.03996		ENSG00000099957	P2RX6	0.00902525	2.00335
ENSG00000171401	KRT13	0.0193952	1.539		ENSG00000100097	LGALS1	0.00457399	1.09905
ENSG00000171517	LPAR3	0.00125646	1.69568		ENSG00000100156	SLC16A8	0.00872563	-2.6493
ENSG00000171595	DNAI2	1.40346e-08	2.52355		ENSG00000100218	RSPH14	3.23485e-05	3.34248
ENSG00000171695	LKAAEAR1	0.0241166	1.9869		ENSG00000100228	RAB36	0.000948501	1.11392
ENSG00000171757	LRRC34	0.00373109	2.46857		ENSG00000100263	RHBDD3	0.00114546	1.0332
ENSG00000171798	KNDC1	5.29938e-07	2.50602		ENSG00000100281	HMGXB4	0.0372684	1.04497
ENSG00000171811	CFAP46	0.000237269	2.53732		ENSG00000100288	CHKB	0.0284505	1.23598
ENSG00000172164	SNTB1	0.00608748	1.66384		ENSG00000100290	BIK	0.00456008	1.0972
ENSG00000172361	CFAP53	1.61809e-08	1.9753		ENSG00000100300	TSPO	0.000427642	1.53356
ENSG00000172426	RSPH9	1.46924e-09	1.60094		ENSG00000100348	TXN2	0.00146358	1.22688
ENSG00000172578	KLHL6	0.000763814	2.3346		ENSG00000100360	IFT27	0.00168162	1.14281
ENSG00000172771	EFCAB12	0.000385083	2.12917		ENSG00000100368	CSF2RB	0.0405667	-1.90634
ENSG00000172955	ADH6	0.0303288	2.86011		ENSG00000100399	CHADL	0.0421527	1.79506
ENSG00000173467	AGR3	1.76188e-06	2.46551		ENSG00000100417	PMM1	0.00135648	1.1684
ENSG00000173702	MUC13	0.0406384	1.82134		ENSG00000100429	HDAC10	0.0027489	1.12813
ENSG00000173947	CIMAP3	4.52381e-09	1.82825		ENSG00000100577	GSTZ1	0.00531982	1.36817
ENSG00000174776	WDR49	0.00711362	2.22979		ENSG00000100592	DAAM1	0.00641423	1.64322
ENSG00000174844	DNAH12	5.07305e-07	2.18208		ENSG00000100629	CEP128	0.00311396	-1.15562
ENSG00000174898	CATSPERD	0.000499699	3.00104		ENSG00000100697	DICER1	0.000796731	-1.00088
ENSG00000174950	CD164L2	1.30938e-06	1.66103		ENSG00000100722	ZC3H14	0.00756882	-1.16154
ENSG00000175040	CHST2	0.00647554	2.30578		ENSG00000100836	PABPN1	0.000995902	1.69801
ENSG00000175267	VWA3A	3.2589e-06	2.37657		ENSG00000100918	REC8	3.65217e-05	1.35761
ENSG00000175274	TP53I11	2.98342e-06	1.5627		ENSG00000101132	PFDN4	0.00206898	1.19533
ENSG00000175664	TEX26	3.28768e-06	2.70852		ENSG00000101144	BMP7	0.0402593	1.69242
ENSG00000176029	C11orf16	0.00109765	1.60563		ENSG00000101182	PSMA7	0.00230421	1.22237
ENSG00000176046	NUPR1	4.14872e-17	2.43901		ENSG00000101220	ADISSP	0.00513331	1.09918
ENSG00000176601	MAP3K19	0.0490852	1.72557		ENSG00000101222	SPEF1	4.20912e-08	3.03873
ENSG00000176842	IRX5	0.00143717	2.28616		ENSG00000101280	ANGPT4	0.0453496	-2.76745
ENSG00000177283	FZD8	0.0303288	1.98458		ENSG00000101407	TTI1	0.0319306	-1.07281
ENSG00000177508	IRX3	6.81493e-14	2.46916		ENSG00000101417	PXMP4	0.0250021	1.0036
ENSG00000177989	CIMAP1B	4.07379e-07	1.15084		ENSG00000101443	WFDC2	4.41253e-05	1.77708
ENSG00000178053	MLF1	1.89893e-08	1.27211		ENSG00000101460	MAP1LC3A	0.00034052	1.72355
ENSG00000178125	PPP1R42	0.0205493	2.19251		ENSG00000101464	PIGU	0.00150567	1.46251
ENSG00000178531	CTXN1	0.019445	1.12711		ENSG00000101639	CEP192	0.00369357	-1.0362
ENSG00000178796	RIIAD1	0.0112004	3.0465		ENSG00000101745	ANKRD12	0.00055805	2.46266
ENSG00000178934	LGALS7	0.00011201	2.64385		ENSG00000101846	STS	0.000873841	-1.41929
ENSG00000178965	ERICH3	0.000416821	2.14999		ENSG00000101868	POLA1	0.00344238	-1.00113
ENSG00000179813	FAM216B	5.79356e-08	2.20149		ENSG00000101882	NKAP	0.0010488	1.81399
ENSG00000179869	ABCA13	0.0104969	1.81912		ENSG00000101966	XIAP	0.0146555	1.36857
ENSG00000179902	CFAP276	1.25805e-13	2.58601		ENSG00000102030	NAA10	0.000754212	1.33394
ENSG00000180353	HCLS1	6.73758e-05	1.81429		ENSG00000102032	RENBP	0.0230922	2.85664
ENSG00000180828	BHLHE22	0.0480482	2.79631		ENSG00000102053	ZC3H12B	0.0458257	1.92403
ENSG00000181085	MAPK15	4.34736e-18	2.60704		ENSG00000102096	PIM2	0.00476997	1.11289
ENSG00000181123	LOC107985579	0.000677933	2.37274		ENSG00000102109	PCSK1N	0.000508774	1.75762
ENSG00000181322	NME9	1.86584e-07	2.44101		ENSG00000102221	JADE3	0.00336994	-1.06948
ENSG00000181378	CFAP65	3.16382e-05	2.16543		ENSG00000102230	PCYT1B	0.00208452	3.38253
ENSG00000181449	SOX2	4.40966e-10	1.95635		ENSG00000102265	TIMP1	0.000867818	1.27936
ENSG00000182853	VMO1	6.69971e-08	1.92406		ENSG00000102390	PBDC1	0.00512317	1.32131
ENSG00000183049	CAMK1D	9.54916e-05	1.45677		ENSG00000102524	TNFSF13B	0.00211477	3.72828
ENSG00000183273	CCDC60	0.00371933	1.89563		ENSG00000102699	PARP4	0.00650504	-1.01204
ENSG00000183346	CABCOCO1	1.06583e-08	2.94879		ENSG00000102760	RGCC	0.00645414	2.58464
ENSG00000183578	TNFAIP8L3	0.015974	2.30479		ENSG00000102904	TSNAXIP1	0.00393757	1.98971
ENSG00000183644	HOATZ	3.73462e-06	2.31875		ENSG00000102908	NFAT5	0.00295991	-1.08414
ENSG00000183690	EFHC2	0.000132955	1.9852		ENSG00000102931	ARL2BP	0.0397704	-1.43295
ENSG00000183914	DNAH2	0.000369267	2.1817		ENSG00000102934	PLLP	0.00142913	1.32382
ENSG00000184012	TMPRSS2	0.00037964	1.53852		ENSG00000102962	CCL22	0.0101442	2.23332
ENSG00000184828	ZBTB7C	0.000119545	1.60307		ENSG00000103021	CFAP263	0.000514402	1.58568
ENSG00000185250	PPIL6	0.000226981	1.62471		ENSG00000103024	NME3	0.000356476	1.73236
ENSG00000185432	TMT1A	5.09252e-18	2.40356		ENSG00000103067	ESRP2	0.0446109	-1.01791
ENSG00000185681	MORN5	1.11879e-10	2.39997		ENSG00000103199	ZNF500	0.00435181	1.45153
ENSG00000185860	CCDC190	0.00396615	1.92215		ENSG00000103245	CIAO3	0.000266867	1.30461
ENSG00000185909	KLHDC8B	0.0161074	1.85083		ENSG00000103253	HAGHL	5.68364e-07	2.30764
ENSG00000186377	CYP4X1	0.00189704	1.9593		ENSG00000103254	ANTKMT	9.29101e-05	2.11566
ENSG00000186471	AKAP14	6.73758e-05	2.14956		ENSG00000103260	METRN	1.06393e-05	1.99167
ENSG00000186710	CFAP73	2.21683e-19	2.41021		ENSG00000103269	RHBDL1	0.02141	1.42675
ENSG00000186952	TMEM232	2.82938e-05	2.15148		ENSG00000103316	CRYM	0.00580889	2.78873
ENSG00000186973	CFAP144	3.76357e-13	2.07702		ENSG00000103363	ELOB	0.000454833	1.8484
ENSG00000187134	AKR1C1	0.00768431	2.2311		ENSG00000103479	RBL2	0.00222779	-1.18199
ENSG00000187492	CDHR4	1.37348e-05	2.22607		ENSG00000103490	PYCARD	0.00119381	1.41363
ENSG00000187889	FYB2	0.0367763	3.25584		ENSG00000103534	TMC5	3.6628e-05	1.90662
ENSG00000187905	LRRC74B	2.91695e-06	3.7088		ENSG00000103550	KNOP1	0.00111778	1.76031
ENSG00000188039	NWD1	2.36148e-05	1.7919		ENSG00000103740	ACSBG1	0.0163957	1.63501
ENSG00000188396	DYNLT4	4.37159e-07	2.14447		ENSG00000103742	IGDCC4	0.0373358	-2.02354
ENSG00000188452	CERKL	0.0409404	2.394		ENSG00000103888	CEMIP	0.0114074	-1.10604
ENSG00000188523	CFAP77	0.000220881	1.93804		ENSG00000103994	ZNF106	0.0424838	1.08666
ENSG00000188659	SAXO2	6.72542e-06	1.63198		ENSG00000104093	DMXL2	0.000674517	-1.03585
ENSG00000188817	SNTN	3.33227e-15	2.37503		ENSG00000104131	EIF3J	0.00191055	1.84236
ENSG00000188959	C9orf152	0.0135856	1.96183		ENSG00000104140	RHOV	0.000353214	1.05025
ENSG00000189157	FAM47E	0.00705796	2.00018		ENSG00000104218	CSPP1	0.00599024	1.44287
ENSG00000189350	TOGARAM2	1.05544e-11	2.5092		ENSG00000104237	RP1	9.35833e-05	3.4626
ENSG00000189377	CXCL17	5.87157e-12	2.05461		ENSG00000104290	FZD3	0.0121821	1.23101
ENSG00000196126	HLA-DRB1	3.71536e-08	1.29251		ENSG00000104324	CPQ	0.0140463	2.39511
ENSG00000196139	AKR1C3	0.000420307	1.87983		ENSG00000104490	NCALD	0.00547738	2.89193
ENSG00000196167	COLCA1	0.0189253	1.63848		ENSG00000104518	GSDMD	0.00160049	1.14565
ENSG00000196169	KIF19	1.28153e-12	2.99711		ENSG00000104728	ARHGEF10	0.0142905	1.86253
ENSG00000196344	ADH7	2.69532e-07	1.67379		ENSG00000104808	DHDH	0.0433643	1.20612
ENSG00000196476	C20orf96	0.00514706	1.05182		ENSG00000104825	NFKBIB	0.00224468	1.72935
ENSG00000196502	SULT1A1	0.0051717	1.73101		ENSG00000104852	SNRNP70	0.00184461	1.02079
ENSG00000196628	TCF4	0.0199564	1.52454		ENSG00000104863	LIN7B	0.00340929	1.27651
ENSG00000196754	S100A2	1.15394e-05	1.32429		ENSG00000104870	FCGRT	0.00116079	1.02187
ENSG00000197180	ATP6AP1-DT	0.0244304	1.1922		ENSG00000104880	ARHGEF18	0.0455209	-1.2617
ENSG00000197446	CYP2F1	0.0302665	1.87934		ENSG00000104886	PLEKHJ1	0.00383487	1.00298
ENSG00000197653	DNAH10	2.34154e-05	1.62008		ENSG00000104889	RNASEH2A	0.000704292	1.19052
ENSG00000197748	CFAP43	1.49961e-06	1.73827		ENSG00000104903	LYL1	0.0294334	2.42506
ENSG00000197826	CFAP299	3.8065e-05	2.65647		ENSG00000104953	TLE6	0.015493	1.67618
ENSG00000198003	ODAD3	6.26541e-05	1.73181		ENSG00000105131	EPHX3	0.0112787	1.80956
ENSG00000198125	MB	5.21017e-09	1.61636		ENSG00000105193	RPS16	0.000738887	1.30422
ENSG00000198157	HMGN5	0.00782497	2.16148		ENSG00000105258	POLR2I	0.000265045	1.86473
ENSG00000198553	KCNRG	0.00631451	1.96057		ENSG00000105372	RPS19	0.000290447	1.70688
ENSG00000198643	FAM3D	6.48389e-06	1.6241		ENSG00000105379	ETFB	0.00136877	1.37808
ENSG00000198692	EIF1AY	9.6309e-05	4.82471		ENSG00000105388	CEACAM5	0.0215995	2.34494
ENSG00000198774	RASSF9	0.016652	2.57565		ENSG00000105393	BABAM1	0.00121498	1.16767
ENSG00000198807	PAX9	0.00542634	1.81229		ENSG00000105404	RABAC1	0.000239511	1.89699
ENSG00000198848	CES1	1.41494e-05	2.59301		ENSG00000105427	CNFN	6.38756e-05	2.68982
ENSG00000203734	ECT2L	0.0100435	1.69927		ENSG00000105472	CLEC11A	0.00271881	2.51877
ENSG00000203778	FAM229B	1.04519e-07	1.69584		ENSG00000105479	ODAD1	2.98354e-05	2.24959
ENSG00000203963	C1orf141	0.0172089	2.39926		ENSG00000105497	ZNF175	0.0209391	-1.04765
ENSG00000203985	LDLRAD1	0.000148884	2.06578		ENSG00000105499	PLA2G4C	0.0226059	1.22634
ENSG00000204052	LRRC73	8.23791e-06	1.74121		ENSG00000105518	TMEM205	0.0011977	1.44306
ENSG00000204103	MAFB	0.0222421	2.57684		ENSG00000105519	CAPS	1.29091e-10	3.15655
ENSG00000204287	HLA-DRA	3.81828e-08	1.6243		ENSG00000105523	FAM83E	0.00567993	1.66211
ENSG00000204385	SLC44A4	1.63451e-11	2.20248		ENSG00000105583	WDR83OS	0.000112301	1.43909
ENSG00000204711	CFAP95	8.54519e-08	2.25596		ENSG00000105619	TFPT	0.000335016	1.42451
ENSG00000204815	ODAD4	0.000240537	1.41803		ENSG00000105639	JAK3	0.0287161	1.3444
ENSG00000204950	LRRC10B	1.5444e-15	2.40866		ENSG00000105647	PIK3R2	0.0164225	1.34818
ENSG00000205129	CFAP96	0.00768431	1.80534		ENSG00000105650	PDE4C	0.00940443	2.78561
ENSG00000205231	TTLL10-AS1	0.00553647	2.95504		ENSG00000105717	PBX4	0.00312449	1.34462
ENSG00000206073	SERPINB4	4.21962e-08	2.37457		ENSG00000105737	GRIK5	0.0192488	2.01812
ENSG00000206113	CFAP99	0.037519	1.63141		ENSG00000105792	CFAP69	0.0270525	1.52926
ENSG00000210184	NA	0.0137274	1.94853		ENSG00000105821	DNAJC2	0.00310404	1.48908
ENSG00000213085	CFAP45	2.71953e-10	1.49983		ENSG00000105849	POLR1F	0.00481369	1.61362
ENSG00000213145	CRIP1	0.00589798	1.62311		ENSG00000105856	HBP1	0.0208636	-1.25938
ENSG00000214456	PLIN5	0.0392839	1.99964		ENSG00000105877	DNAH11	0.00109494	2.13797
ENSG00000215039	CD27-AS1	0.0331994	1.11604		ENSG00000105894	PTN	0.000421734	4.74715
ENSG00000215187	CIMIP2B	4.5037e-14	2.22374		ENSG00000105976	MET	1.15836e-05	-1.04345
ENSG00000215217	CFAP90	5.34497e-14	2.53439		ENSG00000106004	HOXA5	0.0143701	1.16462
ENSG00000222046	DCDC2B	0.0186842	2.08602		ENSG00000106006	HOXA6	0.00861551	-2.81249
ENSG00000223865	HLA-DPB1	0.0394412	2.3639		ENSG00000106034	CPED1	0.00992283	-1.87498
ENSG00000224167	NA	0.0456696	1.46232		ENSG00000106153	CHCHD2	0.00188261	1.04185
ENSG00000224383	PRR29	1.46924e-09	2.13538		ENSG00000106211	HSPB1	0.00048425	1.35421
ENSG00000224858	NA	0.0425476	1.82466		ENSG00000106261	ZKSCAN1	0.00645414	1.83953
ENSG00000228723	SRGAP3-AS2	2.44091e-09	2.01486		ENSG00000106268	NUDT1	0.00219771	1.31214
ENSG00000230062	ANKRD66	0.000231917	2.11566		ENSG00000106278	PTPRZ1	0.00213018	2.56421
ENSG00000230873	STMND1	2.10375e-05	2.2153		ENSG00000106355	LSM5	0.00138059	1.58725
ENSG00000231621	ANKRD44-AS1	1.02557e-05	2.26607		ENSG00000106399	RPA3	0.000261948	1.83032
ENSG00000231738	TSPAN19	2.71435e-05	2.74457		ENSG00000106400	ZNHIT1	0.000850531	1.27944
ENSG00000232415	ELN-AS1	3.13087e-07	2.18824		ENSG00000106415	GLCCI1	0.0264791	1.12551
ENSG00000233730	LINC01765	6.1948e-06	3.4157		ENSG00000106443	PHF14	0.0041157	1.75107
ENSG00000234327	ZNF232-AS1	0.019445	1.21631		ENSG00000106541	AGR2	1.01785e-05	2.99241
ENSG00000234478	ACBD3-AS1	0.000387283	2.1104		ENSG00000106588	PSMA2	0.000565353	2.22508
ENSG00000234520	HRAT17	0.0120451	2.69271		ENSG00000106771	TMEM245	0.0185582	1.31596
ENSG00000236801	RPL24P8	0.042485	2.51018		ENSG00000106772	PRUNE2	0.00199746	2.99919
ENSG00000243543	WFDC6	0.00458999	3.02114		ENSG00000106789	CORO2A	0.00168271	2.02011
ENSG00000243710	CFAP57	0.0260817	1.04702		ENSG00000106829	TLE4	0.00554541	1.70682
ENSG00000243836	WDR86-AS1	6.04096e-06	2.58824		ENSG00000106992	AK1	0.00242615	1.815
ENSG00000243910	TUBA4B	0.00723135	1.59568		ENSG00000107036	RIC1	0.00226005	-1.38908
ENSG00000243955	GSTA1	2.14952e-06	2.07903		ENSG00000107159	CA9	0.0050243	3.17319
ENSG00000244607	CCDC13	6.13458e-05	2.16633		ENSG00000107223	EDF1	0.000771949	1.31887
ENSG00000244734	HBB	0.000399169	2.88088		ENSG00000107281	NPDC1	0.0017885	1.20713
ENSG00000245694	CRNDE	6.63224e-05	2.11381		ENSG00000107341	UBE2R2	0.00790344	1.04925
ENSG00000246016	NA	0.0151271	2.32842		ENSG00000107485	GATA3	0.00181443	1.79336
ENSG00000248144	ADH1C	1.64456e-12	2.02382		ENSG00000107614	TRDMT1	0.0262336	-1.32263
ENSG00000248712	DRC12	0.000652231	1.62795		ENSG00000107731	UNC5B	0.000674517	2.14769
ENSG00000250510	GPR162	5.2396e-10	2.39724		ENSG00000107736	CDH23	0.0217952	2.56866
ENSG00000251562	MALAT1	0.0127683	1.8295		ENSG00000107854	TNKS2	0.000900115	-1.11548
ENSG00000256061	DNAAF4	0.000222357	1.95752		ENSG00000107863	ARHGAP21	0.00296908	-1.01521
ENSG00000257108	NHLRC4	4.52381e-09	2.40811		ENSG00000107872	FBXL15	0.000400454	1.95524
ENSG00000257542	NA	0.00014809	2.51576		ENSG00000107874	CUEDC2	0.000307977	1.09815
ENSG00000258334	TROAP-AS1	0.0268931	1.69128		ENSG00000107890	ANKRD26	0.000421986	2.18472
ENSG00000258752	NA	2.48914e-13	1.9553		ENSG00000107938	EDRF1	0.00316558	-1.21344
ENSG00000259087	NA	0.024105	2.25619		ENSG00000108106	UBE2S	0.00106653	1.25614
ENSG00000260220	CCDC187	0.00671265	2.14492		ENSG00000108107	RPL28	0.00134108	1.22847
ENSG00000260908	NA	0.00286826	3.21799		ENSG00000108244	KRT23	0.00537401	1.08738
ENSG00000263155	MYZAP	0.0393426	1.55212		ENSG00000108389	MTMR4	0.0171119	-1.03515
ENSG00000263639	MSMB	2.56316e-06	3.04247		ENSG00000108423	TUBD1	0.0144723	1.19696
ENSG00000267795	SMIM22	2.56572e-05	1.55493		ENSG00000108479	GALK1	0.000605675	1.13222
ENSG00000268996	MAN1B1-DT	0.033845	1.22489		ENSG00000108602	ALDH3A1	0.00123839	2.40781
ENSG00000269313	MAGIX	0.0234595	1.21038		ENSG00000108641	B9D1	0.00588005	1.2505
ENSG00000270765	GAS2L2	5.96001e-06	2.1684		ENSG00000108786	HSD17B1	0.000887849	2.20703
ENSG00000276422	LOC124906839	0.0125638	3.05453		ENSG00000108797	CNTNAP1	0.0285152	-1.37125
ENSG00000277639	CHD9NB	5.2246e-13	2.05278		ENSG00000108826	MRPL27	0.00105537	1.52638
ENSG00000277749	LOC124903525	0.0293244	2.84084		ENSG00000108848	LUC7L3	0.00139545	2.14987
ENSG00000279965	NA	0.00357721	2.2327		ENSG00000108961	RANGRF	0.000990564	1.91313
					ENSG00000109321	AREG	0.000917463	1.72371
					ENSG00000109390	NDUFC1	0.00079462	1.43725
					ENSG00000109436	TBC1D9	0.00241418	1.99987
					ENSG00000109452	INPP4B	0.000155467	-1.02385
					ENSG00000109475	RPL34	0.000395955	1.5776
					ENSG00000109536	FRG1	0.000438633	2.19451
					ENSG00000109670	FBXW7	0.024467	1.32201
					ENSG00000109685	NSD2	0.0188873	-1.01005
					ENSG00000109686	SH3D19	0.00184507	-1.00957
					ENSG00000109805	NCAPG	0.0137901	-1.07743
					ENSG00000109881	CCDC34	0.000357898	2.24098
					ENSG00000110060	PUS3	0.0360649	1.02054
					ENSG00000110090	CPT1A	0.00504179	1.71712
					ENSG00000110218	PANX1	0.00175373	-1.105
					ENSG00000110237	ARHGEF17	0.0467657	-1.08311
					ENSG00000110318	CEP126	0.0230459	1.48104
					ENSG00000110395	CBL	0.000957157	-1.12214
					ENSG00000110492	MDK	0.000552957	1.31827
					ENSG00000110651	CD81	0.000960999	1.10407
					ENSG00000110700	RPS13	0.000139552	1.59777
					ENSG00000110717	NDUFS8	0.000609265	1.41718
					ENSG00000110777	POU2AF1	0.0024383	3.29621
					ENSG00000111142	METAP2	0.00313488	1.26705
					ENSG00000111252	SH2B3	0.00109494	-1.16701
					ENSG00000111331	OAS3	0.0164015	-1.05351
					ENSG00000111358	GTF2H3	0.0302299	1.11637
					ENSG00000111364	DDX55	0.00336994	1.84246
					ENSG00000111639	MRPL51	0.00122269	1.29442
					ENSG00000111664	GNB3	0.032722	1.98468
					ENSG00000111678	C12orf57	5.41172e-05	2.20923
					ENSG00000111788	DDX12B	0.0422618	-1.04875
					ENSG00000111832	RWDD1	0.000400519	2.43509
					ENSG00000111834	RSPH4A	9.97647e-05	2.23557
					ENSG00000111837	MAK	0.0279953	1.54282
					ENSG00000111913	RIPOR2	4.4366e-06	3.36177
					ENSG00000111962	UST	0.0247255	1.98305
					ENSG00000112137	PHACTR1	0.00994735	2.62335
					ENSG00000112210	RAB23	0.00848032	-1.63181
					ENSG00000112305	SMAP1	0.000450155	2.66462
					ENSG00000112306	RPS12	0.000472241	1.28256
					ENSG00000112414	ADGRG6	0.000267664	-1.11848
					ENSG00000112514	CUTA	0.00144096	1.00178
					ENSG00000112530	PACRG	3.13784e-07	3.22968
					ENSG00000112539	C6orf118	4.20789e-05	3.12374
					ENSG00000112651	MRPL2	0.000853365	1.05371
					ENSG00000112667	DNPH1	0.000704253	1.40729
					ENSG00000112695	COX7A2	0.000931049	1.22668
					ENSG00000112773	TENT5A	0.0244026	1.1149
					ENSG00000112782	CLIC5	0.00162402	-1.35432
					ENSG00000112972	HMGCS1	0.00351202	-1.01526
					ENSG00000112981	NME5	1.01717e-05	3.28216
					ENSG00000113083	LOX	0.0348236	1.50808
					ENSG00000113356	POLR3G	0.0363657	1.07241
					ENSG00000113387	SUB1	0.00181961	1.18749
					ENSG00000113456	RAD1	0.023901	1.07562
					ENSG00000113494	PRLR	0.024467	2.62954
					ENSG00000113657	DPYSL3	4.55785e-07	3.21498
					ENSG00000113810	SMC4	0.0245994	1.20774
					ENSG00000113971	NPHP3	0.00262569	1.89619
					ENSG00000114062	UBE3A	0.0137164	1.24177
					ENSG00000114127	XRN1	0.000123997	-1.13895
					ENSG00000114302	PRKAR2A	0.00498634	1.74889
					ENSG00000114315	HES1	1.98355e-05	2.62837
					ENSG00000114391	RPL24	0.000882463	1.53446
					ENSG00000114439	BBX	0.0256307	1.34937
					ENSG00000114455	HHLA2	0.0005293	3.14188
					ENSG00000114473	DRC9	0.00441356	1.35686
					ENSG00000114541	FRMD4B	0.000601098	-1.06229
					ENSG00000114670	NEK11	0.0295201	1.09234
					ENSG00000114854	TNNC1	0.0372684	1.66672
					ENSG00000114861	FOXP1	0.00333789	1.6361
					ENSG00000114904	NEK4	0.0334602	-1.09255
					ENSG00000115009	CCL20	0.000172154	1.63327
					ENSG00000115020	PIKFYVE	0.000716376	-1.00256
					ENSG00000115239	ASB3	0.0060511	2.12738
					ENSG00000115257	PCSK4	0.0335199	1.16283
					ENSG00000115268	RPS15	0.000990564	1.26967
					ENSG00000115274	INO80B	0.0099613	1.29811
					ENSG00000115297	TLX2	0.017304	1.85129
					ENSG00000115306	SPTBN1	0.000854525	-1.10472
					ENSG00000115325	DOK1	0.0199339	1.07806
					ENSG00000115355	CCDC88A	0.0168679	1.28964
					ENSG00000115414	FN1	0.000507807	-1.09492
					ENSG00000115423	DNAH6	5.69585e-05	2.88882
					ENSG00000115457	IGFBP2	2.82641e-10	3.00888
					ENSG00000115461	IGFBP5	1.16742e-09	2.97209
					ENSG00000115464	USP34	0.000212664	-1.66408
					ENSG00000115504	EHBP1	0.00417731	-1.05485
					ENSG00000115525	ST3GAL5	0.027488	1.65403
					ENSG00000115594	IL1R1	0.00529186	-1.07044
					ENSG00000115705	TPO	0.0262667	-3.20168
					ENSG00000115738	ID2	0.00483218	1.56393
					ENSG00000115866	DARS1	0.00362061	1.49691
					ENSG00000115977	AAK1	0.00486296	1.7344
					ENSG00000116032	GRIN3B	0.0122017	1.42978
					ENSG00000116199	FAM20B	0.00504965	-1.02901
					ENSG00000116299	ELAPOR1	0.0103362	1.03227
					ENSG00000116586	LAMTOR2	0.00132761	1.16996
					ENSG00000116661	FBXO2	0.00110004	1.13971
					ENSG00000116667	C1orf21	0.0046316	2.82566
					ENSG00000116675	DNAJC6	0.00243742	-1.0679
					ENSG00000116678	LEPR	8.5491e-05	-1.10374
					ENSG00000116691	MIIP	0.000487807	1.01889
					ENSG00000116741	RGS2	0.0206722	1.92386
					ENSG00000116754	SRSF11	0.00383273	1.55588
					ENSG00000116885	OSCP1	0.000181305	1.55201
					ENSG00000116918	TSNAX	0.0295201	1.19495
					ENSG00000116962	NID1	0.0124635	-1.21084
					ENSG00000116984	MTR	0.00140733	-1.09857
					ENSG00000116991	SIPA1L2	0.0225154	1.79089
					ENSG00000117036	ETV3	0.0117477	-1.04893
					ENSG00000117069	ST6GALNAC5	0.0154387	-1.13276
					ENSG00000117245	KIF17	0.0309866	-1.58863
					ENSG00000117280	RAB29	0.0133834	1.13483
					ENSG00000117425	PTCH2	0.00180834	3.07259
					ENSG00000117472	TSPAN1	0.000157686	1.11048
					ENSG00000117477	CCDC181	0.000931049	2.54381
					ENSG00000117481	NSUN4	0.0126642	1.22329
					ENSG00000117501	MROH9	0.00950801	3.51236
					ENSG00000117523	PRRC2C	0.00568099	1.49846
					ENSG00000117614	SYF2	0.00273191	1.58596
					ENSG00000117691	NENF	0.000467872	1.74435
					ENSG00000117983	MUC5B	6.25432e-06	2.92217
					ENSG00000117984	CTSD	0.000750473	1.31655
					ENSG00000118007	STAG1	0.00945914	-1.55205
					ENSG00000118181	RPS25	0.00087908	1.01417
					ENSG00000118257	NRP2	0.000872659	2.73681
					ENSG00000118292	C1orf54	0.0347747	-1.50377
					ENSG00000118298	CA14	0.0331294	1.78379
					ENSG00000118307	DNAI7	1.05052e-05	2.86905
					ENSG00000118407	FILIP1	0.0132868	2.21185
					ENSG00000118492	ADGB	0.00242595	3.07033
					ENSG00000118496	FBXO30	0.00150157	-1.03903
					ENSG00000118620	ZNF430	0.0117527	1.15897
					ENSG00000118640	VAMP8	0.000812072	1.43454
					ENSG00000118762	PKD2	0.0192759	-1.22029
					ENSG00000118816	CCNI	0.0117328	1.05389
					ENSG00000118898	PPL	0.0209432	-1.08804
					ENSG00000118939	UCHL3	0.00175898	1.65453
					ENSG00000118997	DNAH7	0.0082404	2.13588
					ENSG00000119004	CYP20A1	0.00667439	1.26144
					ENSG00000119013	NDUFB3	0.002282	1.24891
					ENSG00000119147	ECRG4	1.17499e-06	3.571
					ENSG00000119285	HEATR1	0.0201473	-1.17893
					ENSG00000119431	HDHD3	0.00143759	1.64319
					ENSG00000119559	C19orf25	0.000413679	1.25075
					ENSG00000119630	PGF	0.000116903	1.31821
					ENSG00000119632	IFI27L2	0.000679789	1.93153
					ENSG00000119636	BBOF1	0.000674517	1.81942
					ENSG00000119705	SLIRP	0.000812893	1.59649
					ENSG00000119707	RBM25	0.000321353	2.77783
					ENSG00000119720	NRDE2	0.007797	1.23448
					ENSG00000119725	ZNF410	0.0255953	-1.25066
					ENSG00000119771	KLHL29	0.0295208	-1.21586
					ENSG00000119899	SLC17A5	0.0138417	1.26185
					ENSG00000119943	PYROXD2	0.0392308	1.24264
					ENSG00000119979	DENND10	0.0157759	1.17886
					ENSG00000120051	CFAP58	0.00860714	1.95889
					ENSG00000120055	C10orf95	6.01766e-06	2.15586
					ENSG00000120217	CD274	0.00047586	-1.01998
					ENSG00000120262	CCDC170	1.00138e-08	3.28557
					ENSG00000120519	SLC10A7	0.000799984	-1.0107
					ENSG00000120688	WBP4	0.0011977	1.65328
					ENSG00000120868	APAF1	0.00986274	-1.61033
					ENSG00000120885	CLU	4.1831e-06	1.13218
					ENSG00000120942	UBIAD1	0.0400784	1.11043
					ENSG00000121005	CRISPLD1	0.00104529	4.26585
					ENSG00000121039	RDH10	0.00115663	1.43529
					ENSG00000121067	SPOP	0.00641423	1.3423
					ENSG00000121207	LRAT	0.0120926	2.30614
					ENSG00000121211	MND1	0.00235936	1.02016
					ENSG00000121281	ADCY7	0.0156362	-1.71704
					ENSG00000121310	ECHDC2	0.00738267	1.02791
					ENSG00000121413	ZSCAN18	0.00196733	2.11724
					ENSG00000121552	CSTA	0.00370124	2.11918
					ENSG00000121653	MAPK8IP1	0.0003168	1.66429
					ENSG00000121680	PEX16	0.00125543	1.16206
					ENSG00000121716	PILRB	0.00884471	1.40538
					ENSG00000121743	GJA3	0.00991176	-1.43059
					ENSG00000121766	ZCCHC17	0.00235936	1.29921
					ENSG00000121769	FABP3	0.0023863	2.70523
					ENSG00000121851	POLR3GL	0.0292061	1.05535
					ENSG00000121858	TNFSF10	0.0115576	1.76797
					ENSG00000121898	CPXM2	0.0242903	2.27187
					ENSG00000121940	CLCC1	0.0163988	-1.23389
					ENSG00000121957	GPSM2	0.0163957	-1.0595
					ENSG00000122026	RPL21	0.000464803	1.569
					ENSG00000122257	RBBP6	0.00171882	1.90663
					ENSG00000122378	PRXL2A	0.0061759	1.26354
					ENSG00000122483	CCDC18	0.0223304	1.35261
					ENSG00000122641	INHBA	0.0126966	1.46167
					ENSG00000122735	DNAI1	1.86499e-07	2.81322
					ENSG00000122741	DCAF10	0.00712341	1.57592
					ENSG00000122863	CHST3	0.0157247	-1.02358
					ENSG00000122873	CISD1	0.00125146	1.59476
					ENSG00000122966	CIT	0.00547368	-1.07235
					ENSG00000123094	RASSF8	0.00419634	-1.0009
					ENSG00000123096	SSPN	0.00483267	1.54368
					ENSG00000123106	CCDC91	0.00658868	1.61694
					ENSG00000123144	TRIR	0.00130713	1.00752
					ENSG00000123200	ZC3H13	0.0128508	1.32218
					ENSG00000123349	PFDN5	0.000466536	1.38268
					ENSG00000123560	PLP1	0.00579073	2.1861
					ENSG00000123600	METTL8	0.0292058	1.22138
					ENSG00000123636	BAZ2B	0.00284679	2.02102
					ENSG00000123643	SLC36A1	0.0169328	-1.2189
					ENSG00000123810	B9D2	0.00573051	1.08904
					ENSG00000123870	ZNF137P	0.0210169	-1.62004
					ENSG00000123977	DAW1	0.0100274	1.12712
					ENSG00000124102	PI3	3.90803e-05	1.98107
					ENSG00000124107	SLPI	2.41483e-05	2.31535
					ENSG00000124134	KCNS1	0.0280292	-1.4198
					ENSG00000124172	ATP5F1E	0.000374471	1.5912
					ENSG00000124181	PLCG1	0.0403838	-1.19499
					ENSG00000124198	ARFGEF2	0.000565219	-1.18777
					ENSG00000124215	CDH26	0.0334736	1.73369
					ENSG00000124222	STX16	0.00405294	1.6459
					ENSG00000124225	PMEPA1	0.010604	1.06179
					ENSG00000124237	CIMIP1	1.68279e-12	3.54305
					ENSG00000124251	TP53TG5	0.0234545	-1.33685
					ENSG00000124380	SNRNP27	0.0188807	1.02596
					ENSG00000124459	ZNF45	0.0217428	-1.19761
					ENSG00000124614	RPS10	0.000603314	1.53918
					ENSG00000124664	SPDEF	0.0389813	2.34713
					ENSG00000124749	COL21A1	0.00169785	2.67398
					ENSG00000124766	SOX4	0.00130913	2.12991
					ENSG00000124831	LRRFIP1	0.00173781	1.86764
					ENSG00000124942	AHNAK	0.00423244	-1.00334
					ENSG00000125107	CNOT1	0.001807	-1.33839
					ENSG00000125148	MT2A	7.99675e-05	2.09894
					ENSG00000125285	SOX21	0.00117486	2.94504
					ENSG00000125351	UPF3B	0.00114532	2.08474
					ENSG00000125356	NDUFA1	0.000445792	1.37802
					ENSG00000125375	DMAC2L	0.00879863	1.48442
					ENSG00000125458	NT5C	0.000225404	1.77947
					ENSG00000125482	TTF1	0.00451402	1.20126
					ENSG00000125611	CHCHD5	0.000662406	1.909
					ENSG00000125650	PSPN	0.00493489	1.24202
					ENSG00000125652	ALKBH7	5.41379e-05	2.10088
					ENSG00000125676	THOC2	0.002125	1.82118
					ENSG00000125743	SNRPD2	0.000383473	1.75106
					ENSG00000125812	GZF1	0.00068322	-1.10509
					ENSG00000125864	BFSP1	0.0128798	1.92689
					ENSG00000125870	SNRPB2	0.000680641	2.04105
					ENSG00000125877	ITPA	0.00231332	1.10935
					ENSG00000125966	MMP24	0.0188873	1.92273
					ENSG00000125968	ID1	4.73529e-05	1.73782
					ENSG00000125977	EIF2S2	0.000414735	2.30541
					ENSG00000125995	ROMO1	4.52367e-05	2.87929
					ENSG00000125999	BPIFB1	1.27621e-05	2.67757
					ENSG00000126016	AMOT	7.30567e-06	-1.04929
					ENSG00000126217	MCF2L	0.0125568	1.69441
					ENSG00000126246	IGFLR1	0.0130104	1.46825
					ENSG00000126267	COX6B1	0.000425186	1.80454
					ENSG00000126432	PRDX5	0.00174068	1.21417
					ENSG00000126460	PRRG2	0.00680209	1.09941
					ENSG00000126653	NSRP1	0.00138622	1.66445
					ENSG00000126709	IFI6	0.00309631	1.16104
					ENSG00000126749	EMG1	0.00495323	1.22286
					ENSG00000126861	OMG	2.82488e-06	2.69448
					ENSG00000126870	DYNC2I1	0.00438644	1.30584
					ENSG00000126934	MAP2K2	0.000688488	1.22323
					ENSG00000127081	ZNF484	0.00595179	-1.47894
					ENSG00000127129	EDN2	7.37361e-09	4.89977
					ENSG00000127184	COX7C	0.00177137	1.12131
					ENSG00000127249	ATP13A4	0.0243981	2.45111
					ENSG00000127324	TSPAN8	0.00252064	2.74081
					ENSG00000127329	PTPRB	0.00171707	-1.1391
					ENSG00000127540	UQCR11	0.00030869	1.68497
					ENSG00000127616	SMARCA4	0.00269813	1.21702
					ENSG00000127914	AKAP9	0.0102537	1.3155
					ENSG00000127922	SEM1	0.00119555	1.39261
					ENSG00000128052	KDR	0.0170998	-1.00619
					ENSG00000128159	TUBGCP6	0.0492074	-1.12983
					ENSG00000128228	SDF2L1	0.00380609	1.1374
					ENSG00000128266	GNAZ	0.0400562	1.25527
					ENSG00000128309	MPST	0.00244223	1.10228
					ENSG00000128408	RIBC2	0.0109918	1.3101
					ENSG00000128534	LSM8	0.0046994	1.24353
					ENSG00000128536	CDHR3	1.22687e-05	2.55046
					ENSG00000128594	LRRC4	0.00338953	1.18064
					ENSG00000128626	MRPS12	0.000257365	1.86168
					ENSG00000128656	CHN1	0.038619	-1.71834
					ENSG00000128692	EIF2S2P4	0.00165738	2.43527
					ENSG00000128739	SNRPN	2.38595e-10	4.09292
					ENSG00000128833	MYO5C	0.000107938	-1.07516
					ENSG00000128881	TTBK2	0.0170275	1.21276
					ENSG00000128923	MINDY2	0.0106929	1.77153
					ENSG00000129158	SERGEF	0.00560092	1.43952
					ENSG00000129173	E2F8	0.00826196	-1.10022
					ENSG00000129214	SHBG	0.00319116	3.55344
					ENSG00000129226	CD68	0.00612654	2.14679
					ENSG00000129235	TXNDC17	0.000339634	1.73729
					ENSG00000129295	DNAAF11	6.51579e-07	3.68748
					ENSG00000129514	FOXA1	6.84785e-08	3.02909
					ENSG00000129521	EGLN3	0.00170848	1.49818
					ENSG00000129559	NEDD8	0.00190992	1.1942
					ENSG00000129595	EPB41L4A	0.000738887	4.26025
					ENSG00000129654	FOXJ1	8.33859e-11	3.04094
					ENSG00000129680	MAP7D3	0.0117353	1.40825
					ENSG00000129757	CDKN1C	2.98354e-05	2.40047
					ENSG00000129810	SGO1	0.0030971	1.78885
					ENSG00000129824	RPS4Y1	2.03559e-05	3.16111
					ENSG00000129951	PLPPR3	3.84363e-08	3.27177
					ENSG00000130005	GAMT	0.00111778	1.63457
					ENSG00000130066	SAT1	0.000223212	1.018
					ENSG00000130119	GNL3L	0.00594683	1.8837
					ENSG00000130203	APOE	0.00058064	1.48014
					ENSG00000130208	APOC1	0.0179449	1.16754
					ENSG00000130222	GADD45G	0.0159458	1.68648
					ENSG00000130255	RPL36	7.65247e-05	2.23876
					ENSG00000130303	BST2	0.000752274	1.401
					ENSG00000130304	SLC27A1	0.00396027	1.09746
					ENSG00000130313	PGLS	0.000256055	1.60646
					ENSG00000130332	LSM7	0.000845054	1.52953
					ENSG00000130363	RSPH3	0.0444042	1.08567
					ENSG00000130413	STK33	1.67385e-05	2.89112
					ENSG00000130433	CACNG6	0.00170442	1.24364
					ENSG00000130511	SSBP4	0.000467872	1.11184
					ENSG00000130517	PGPEP1	0.00369357	1.25323
					ENSG00000130522	JUND	0.000895461	1.18711
					ENSG00000130592	LSP1	0.0426377	2.33475
					ENSG00000130598	TNNI2	0.0131074	2.0937
					ENSG00000130600	H19	0.0209689	2.58162
					ENSG00000130635	COL5A1	0.00832938	-1.19079
					ENSG00000130723		0.0100078	-1.52051
					ENSG00000130724	CHMP2A	0.00235813	1.09452
					ENSG00000130731	METTL26	0.00235908	1.13964
					ENSG00000130748	TMEM160	3.54116e-05	2.62165
					ENSG00000130751	NPAS1	0.000685074	2.37952
					ENSG00000130755	GMFG	0.0242739	2.6971
					ENSG00000130772	MED18	0.00253063	1.25509
					ENSG00000130810	PPAN	0.00125176	1.78357
					ENSG00000130818	ZNF426	0.0330716	1.33178
					ENSG00000130821	SLC6A8	4.56672e-05	1.59944
					ENSG00000130822	PNCK	4.58887e-05	6.28541
					ENSG00000130921	MTRFR	0.0043479	1.32163
					ENSG00000131044	TTLL9	0.0368694	1.9198
					ENSG00000131116	ZNF428	0.000171675	1.55292
					ENSG00000131143	COX4I1	0.00254575	1.06271
					ENSG00000131171	SH3BGRL	0.00024352	3.32379
					ENSG00000131174	COX7B	0.00126093	1.25104
					ENSG00000131187	F12	0.0061442	1.26124
					ENSG00000131188	PRR7	0.0025839	1.41834
					ENSG00000131368	MRPS25	0.00465725	1.26603
					ENSG00000131437	KIF3A	0.0197266	1.38628
					ENSG00000131469	RPL27	0.00150783	1.29303
					ENSG00000131495	NDUFA2	0.00123839	1.37411
					ENSG00000131668	BARX1	0.0019003	1.30839
					ENSG00000131711	MAP1B	0.00151294	2.29654
					ENSG00000131747	TOP2A	0.0182251	1.17657
					ENSG00000131944	FAAP24	0.00146483	2.00973
					ENSG00000131969	ABHD12B	0.0265008	1.22438
					ENSG00000132004	FBXW9	0.000232703	1.59755
					ENSG00000132122	SPATA6	2.98354e-05	3.51265
					ENSG00000132259	CNGA4	0.0104583	2.01742
					ENSG00000132321	DRC11	0.000448929	1.85997
					ENSG00000132329	RAMP1	0.000618279	2.17221
					ENSG00000132386	SERPINF1	0.000290447	1.79921
					ENSG00000132405	TBC1D14	0.00913501	-1.74197
					ENSG00000132424	PNISR	0.00877398	1.41263
					ENSG00000132432	SEC61G	0.00125543	1.63086
					ENSG00000132466	ANKRD17	0.024618	1.47905
					ENSG00000132530	XAF1	0.000474007	-1.31198
					ENSG00000132549	VPS13B	0.000131406	-1.20913
					ENSG00000132554	RGS22	2.31667e-05	3.92425
					ENSG00000132561	MATN2	0.00148169	-1.35809
					ENSG00000132661	NXT1	0.000833118	1.02132
					ENSG00000132821	VSTM2L	4.42809e-07	3.28455
					ENSG00000132832		0.0377005	-1.38819
					ENSG00000132915	PDE6A	0.00717818	2.1575
					ENSG00000133059	DSTYK	0.0170713	1.33901
					ENSG00000133101	CCNA1	0.00171482	2.79338
					ENSG00000133115	STOML3	1.7822e-06	3.23631
					ENSG00000133134	BEX2	0.000225404	1.3893
					ENSG00000133226	SRRM1	0.00414019	1.56489
					ENSG00000133250	ZNF414	0.00420913	1.22103
					ENSG00000133256	PDE6B	0.0142611	1.09925
					ENSG00000133302	SLF1	0.0168681	1.34216
					ENSG00000133321	PLAAT4	0.000715855	1.58931
					ENSG00000133328	PLAAT2	0.000448929	1.72841
					ENSG00000133460	SLC2A11	0.018381	1.12359
					ENSG00000133640	LRRIQ1	3.15557e-08	4.07891
					ENSG00000133657	ATP13A3	1.43596e-05	-1.14076
					ENSG00000133661	SFTPD	0.0433317	2.52257
					ENSG00000133665	DYDC2	3.295e-05	3.25702
					ENSG00000133739	LRRCC1	0.027854	1.15661
					ENSG00000133773	CCDC59	0.00247857	1.37579
					ENSG00000133816	MICAL2	0.00684782	-1.34136
					ENSG00000133983	COX16	0.0023669	1.15688
					ENSG00000134013	LOXL2	0.0415627	-1.02378
					ENSG00000134121	CHL1	0.000396214	3.44821
					ENSG00000134186	PRPF38B	0.0128003	1.09631
					ENSG00000134250	NOTCH2	6.55149e-05	-1.06731
					ENSG00000134278	SPIRE1	0.00303886	-1.42151
					ENSG00000134313	KIDINS220	0.000960999	-1.03134
					ENSG00000134352	IL6ST	1.80811e-05	-1.24777
					ENSG00000134363	FST	0.00710301	1.51277
					ENSG00000134398	ERN2	0.000507474	2.4509
					ENSG00000134597	RBMX2	0.000451573	1.82536
					ENSG00000134668	SPOCD1	0.000617832	2.59391
					ENSG00000134762	DSC3	0.0049864	-1.21429
					ENSG00000134809	TIMM10	0.000857646	1.48918
					ENSG00000134825	TMEM258	0.00348232	1.13436
					ENSG00000134827	TCN1	0.0244175	2.1954
					ENSG00000134873	CLDN10	0.001285	2.37445
					ENSG00000134897	BIVM	0.0368502	1.23223
					ENSG00000135116	HRK	0.0417727	1.35127
					ENSG00000135119	RNFT2	0.00163084	1.37958
					ENSG00000135205	CCDC146	0.000123497	1.75175
					ENSG00000135245	HILPDA	0.00504965	1.23527
					ENSG00000135250	SRPK2	0.0218039	1.13073
					ENSG00000135253	KCP	0.00954296	1.03238
					ENSG00000135362	PRR5L	0.0305537	1.27757
					ENSG00000135363	LMO2	0.0408508	1.16217
					ENSG00000135378	PRRG4	0.0334602	1.17072
					ENSG00000135390	ATP5MC2	0.000830787	1.22651
					ENSG00000135404	CD63	0.00247597	1.09731
					ENSG00000135406	PRPH	0.0160306	1.59854
					ENSG00000135441	BLOC1S1	0.00102905	1.61076
					ENSG00000135519	KCNH3	1.96802e-06	2.21969
					ENSG00000135549	PKIB	0.0436416	1.22216
					ENSG00000135587	SMPD2	0.00104943	1.22522
					ENSG00000135637	CCDC142	0.00334735	1.74075
					ENSG00000135720	DYNC1LI2	0.00513192	-1.04451
					ENSG00000135821	GLUL	2.60997e-07	2.5938
					ENSG00000135862	LAMC1	0.00633695	-1.10326
					ENSG00000135913	USP37	0.000324243	-1.38344
					ENSG00000135917	SLC19A3	0.0270025	1.02195
					ENSG00000135940	COX5B	0.00124367	1.10044
					ENSG00000135968	GCC2	0.0458828	1.10606
					ENSG00000135976	ANKRD36	0.00142253	2.77382
					ENSG00000136010	ALDH1L2	5.92101e-06	-1.37313
					ENSG00000136026	CKAP4	0.0166576	1.01486
					ENSG00000136149	RPL13AP25	0.00124207	3.16531
					ENSG00000136213	CHST12	0.00395613	1.20366
					ENSG00000136231	IGF2BP3	0.00579244	-1.78479
					ENSG00000136238	RAC1	0.000856466	1.84523
					ENSG00000136274	NACAD	0.0377652	1.52155
					ENSG00000136404	TM6SF1	0.0101916	-1.68047
					ENSG00000136449	MYCBPAP	0.00665406	2.4037
					ENSG00000136478	TEX2	0.00188261	-1.12838
					ENSG00000136492	BRIP1	0.00115663	-1.11635
					ENSG00000136522	MRPL47	0.0018105	1.02926
					ENSG00000136630	HLX	0.0130319	2.43858
					ENSG00000136643	RPS6KC1	0.00679505	-1.09165
					ENSG00000136770	DNAJC1	0.00108767	1.91088
					ENSG00000136810	TXN	0.00030818	1.38239
					ENSG00000136819	C9orf78	0.000746584	2.35484
					ENSG00000136867	SLC31A2	0.0496302	-1.56804
					ENSG00000136874	STX17	4.58887e-05	-1.05603
					ENSG00000136918	WDR38	2.75746e-11	3.15487
					ENSG00000136925	TSTD2	0.00157093	-1.98618
					ENSG00000136938	ANP32B	0.00327104	1.31091
					ENSG00000136942	RPL35	0.00396059	1.01711
					ENSG00000137098	SPAG8	0.00124367	1.95138
					ENSG00000137133	HINT2	0.00174068	1.23217
					ENSG00000137154	RPS6	0.000857646	1.17564
					ENSG00000137288	UQCC2	0.00244468	1.12224
					ENSG00000137414	FAM8A1	0.0120268	-1.04671
					ENSG00000137434	C6orf52	0.0355148	1.44285
					ENSG00000137449	CPEB2	0.0466105	1.88195
					ENSG00000137473	TTC29	8.04413e-06	3.42257
					ENSG00000137648	TMPRSS4	2.80823e-05	2.56359
					ENSG00000137691	CFAP300	3.00481e-07	2.2667
					ENSG00000137710	RDX	0.0166045	1.35407
					ENSG00000137745	MMP13	0.00372016	2.62661
					ENSG00000137764	MAP2K5	0.00325567	1.04477
					ENSG00000137776	SLTM	0.00700041	1.43804
					ENSG00000137815	RTF1	0.00160477	1.65325
					ENSG00000137818	RPLP1	0.00020229	2.00607
					ENSG00000137841	PLCB2	0.00969521	1.42358
					ENSG00000137857	DUOX1	0.0018804	1.5861
					ENSG00000137970	RPL7P9	0.00117374	2.40834
					ENSG00000138080	EMILIN1	0.0266571	1.67667
					ENSG00000138081	FBXO11	0.00884471	-1.03929
					ENSG00000138119	MYOF	0.00799153	-1.27602
					ENSG00000138131	LOXL4	0.0175938	2.33251
					ENSG00000138182	KIF20B	0.0254233	1.22663
					ENSG00000138246	DNAJC13	0.00343634	-1.13213
					ENSG00000138326	RPS24	0.000977988	1.05609
					ENSG00000138356	AOX1	0.00650504	-1.08099
					ENSG00000138386	NAB1	0.00587627	-1.04239
					ENSG00000138398	PPIG	0.00139265	1.93953
					ENSG00000138400	MDH1B	0.00186771	2.01025
					ENSG00000138433	CIRSR	0.000810837	1.81208
					ENSG00000138448	ITGAV	9.71111e-05	-1.21471
					ENSG00000138495	COX17	0.000288317	2.00822
					ENSG00000138587	MNS1	0.00292044	1.70505
					ENSG00000138592	USP8	0.027172	1.0714
					ENSG00000138621	PPCDC	0.00379544	1.0182
					ENSG00000138639	ARHGAP24	0.0323186	2.14329
					ENSG00000138641	HERC3	0.00568678	-1.26235
					ENSG00000138642	HERC6	0.0257656	-1.12475
					ENSG00000138738	PRDM5	0.000308973	-1.20257
					ENSG00000138756	BMP2K	0.00495577	-1.14781
					ENSG00000138759	FRAS1	0.017656	-1.39987
					ENSG00000138778	CENPE	0.0241284	1.25944
					ENSG00000139116	KIF21A	0.00674701	1.28649
					ENSG00000139168	ZCRB1	9.6603e-05	2.79542
					ENSG00000139194	RBP5	0.0255601	-1.54448
					ENSG00000139233	LLPH	0.0113716	1.13227
					ENSG00000139266	MARCHF9	0.00173428	1.41666
					ENSG00000139292	LGR5	0.0306895	-2.40028
					ENSG00000139343	SNRPF	0.00128266	1.16351
					ENSG00000139372	TDG	0.0144819	1.07719
					ENSG00000139433	GLTP	0.00290775	1.69332
					ENSG00000139436	GIT2	0.00140849	-1.01834
					ENSG00000139537	DRC2	0.000316579	1.67482
					ENSG00000139613	SMARCC2	0.0131438	-1.17196
					ENSG00000139687	RB1	0.00142089	-1.00771
					ENSG00000139697	SBNO1	0.0172011	1.25429
					ENSG00000139714	MORN3	0.000873841	1.82453
					ENSG00000139746	RBM26	0.0299481	1.03238
					ENSG00000139899	CBLN3	0.0004878	-2.15889
					ENSG00000140009	ESR2	0.0424459	1.61484
					ENSG00000140025	EFCAB11	0.00111081	1.73086
					ENSG00000140057	AK7	0.000265045	2.12339
					ENSG00000140157	NIPA2	0.0202061	-1.01132
					ENSG00000140254	DUOXA1	0.000849193	2.31701
					ENSG00000140262	TCF12	0.00242615	-1.29931
					ENSG00000140264	SERF2	0.000259539	1.9283
					ENSG00000140297	GCNT3	0.0336296	1.68953
					ENSG00000140365	COMMD4	0.000640457	1.42158
					ENSG00000140382	HMG20A	0.018607	-1.34913
					ENSG00000140396	NCOA2	1.4396e-06	-1.20276
					ENSG00000140398	NEIL1	0.0171937	1.04346
					ENSG00000140479	PCSK6	0.00720216	2.94956
					ENSG00000140481	CCDC33	3.46409e-06	2.50415
					ENSG00000140527	WDR93	0.0165907	1.90668
					ENSG00000140548	ZNF710	0.0335596	-1.32781
					ENSG00000140691	ARMC5	0.000917117	1.30818
					ENSG00000140749	IGSF6	0.016753	4.17428
					ENSG00000140836	ZFHX3	0.0156687	1.47442
					ENSG00000140961	OSGIN1	0.00108563	1.4566
					ENSG00000140990	NDUFB10	0.00101196	1.14818
					ENSG00000141002	TCF25	0.00192498	1.36198
					ENSG00000141027	NCOR1	0.032447	1.09854
					ENSG00000141294	LRRC46	3.50847e-09	2.63903
					ENSG00000141456	PELP1	0.00292044	1.39007
					ENSG00000141499	WRAP53	0.00112763	1.27752
					ENSG00000141504	SAT2	0.000651031	1.5718
					ENSG00000141519	CCDC40	9.69756e-05	2.25158
					ENSG00000141552	ANAPC11	0.000746584	1.46254
					ENSG00000141569	TRIM65	0.00638373	1.18004
					ENSG00000141665	FBXO15	0.000374792	3.17888
					ENSG00000141759	TXNL4A	0.00257455	1.21499
					ENSG00000141867	BRD4	0.00513331	1.47957
					ENSG00000141873	SLC39A3	0.000571752	1.41887
					ENSG00000141905	NFIC	0.0038504	1.5831
					ENSG00000141933	TPGS1	0.000291408	2.34681
					ENSG00000141934	PLPP2	0.000415677	1.34205
					ENSG00000141965	FEM1A	0.0356832	1.13944
					ENSG00000141971	MVB12A	0.000793569	1.25412
					ENSG00000142046	TMEM91	0.00576588	1.29862
					ENSG00000142168	SOD1	0.00146701	1.0956
					ENSG00000142227	EMP3	0.000801714	1.40813
					ENSG00000142273	CBLC	0.00030818	1.34432
					ENSG00000142408	CACNG8	0.0158933	1.2801
					ENSG00000142507	PSMB6	0.00108268	1.29471
					ENSG00000142541	RPL13A	0.00131552	1.07356
					ENSG00000142544	CTU1	4.52367e-05	2.20235
					ENSG00000142546	NOSIP	0.00140849	1.1998
					ENSG00000142609	CFAP74	0.0029049	2.09725
					ENSG00000142621	FHAD1	0.000231757	1.418
					ENSG00000142684	ZNF593	0.000282959	2.7261
					ENSG00000142687	KIAA0319L	0.0164828	1.1321
					ENSG00000142694	EVA1B	0.000773452	1.28665
					ENSG00000142794	NBPF3	0.0122017	-1.30313
					ENSG00000142798	HSPG2	0.021204	-1.31756
					ENSG00000142937	RPS8	0.000745909	1.36583
					ENSG00000142959	BEST4	0.0450266	2.39858
					ENSG00000142973	CYP4B1	1.74907e-07	2.53252
					ENSG00000143061	IGSF3	0.0175336	-1.14557
					ENSG00000143067	ZNF697	0.0114995	-1.05306
					ENSG00000143198	MGST3	0.00240071	1.22191
					ENSG00000143314	MRPL24	0.000746584	1.15039
					ENSG00000143315	PIGM	0.00709698	1.6486
					ENSG00000143319	ISG20L2	0.00593653	1.28652
					ENSG00000143365	RORC	6.0263e-05	3.93966
					ENSG00000143382	ADAMTSL4	0.0458559	-1.1867
					ENSG00000143416	SELENBP1	0.000100339	2.70675
					ENSG00000143458	GABPB2	0.0157112	1.28143
					ENSG00000143515	ATP8B2	0.0271502	-1.07752
					ENSG00000143546	S100A8	0.00785554	1.19382
					ENSG00000143578	CREB3L4	0.000398833	1.16353
					ENSG00000143624	INTS3	0.0466105	-1.00298
					ENSG00000143702	CEP170	0.000182505	-1.11291
					ENSG00000143774	GUK1	0.00191292	1.07181
					ENSG00000143793	C1orf35	0.000990564	1.73122
					ENSG00000143891	GALM	0.0080747	1.18181
					ENSG00000143947	RPS27A	0.00029689	1.67791
					ENSG00000143995	MEIS1	0.000920673	3.6733
					ENSG00000144026	ZNF514	0.0407737	1.16735
					ENSG00000144029	MRPS5	0.00159724	1.49011
					ENSG00000144036	EXOC6B	0.000308973	-1.32066
					ENSG00000144063	MALL	0.0394835	-1.2685
					ENSG00000144115	THNSL2	0.0210208	1.65591
					ENSG00000144134	RABL2A	0.0211289	1.15416
					ENSG00000144224	UBXN4	0.0119823	1.60971
					ENSG00000144357	UBR3	0.000406792	-1.03597
					ENSG00000144452	ABCA12	0.000400519	-1.33519
					ENSG00000144476	ACKR3	1.03093e-05	2.81627
					ENSG00000144485	HES6	0.00079462	1.1125
					ENSG00000144560	VGLL4	0.0113391	-1.20544
					ENSG00000144681	STAC	0.0163871	-1.16446
					ENSG00000144713	RPL32	0.000460705	1.35525
					ENSG00000144749	LRIG1	0.00155759	1.55932
					ENSG00000144810	COL8A1	0.0348762	2.43264
					ENSG00000144908	ALDH1L1	0.00563059	1.43769
					ENSG00000145012	LPP	0.0234215	1.2508
					ENSG00000145113	MUC4	0.00115663	1.45934
					ENSG00000145220	LYAR	0.00142253	1.97912
					ENSG00000145246	ATP10D	0.00111969	-1.05513
					ENSG00000145287	PLAC8	0.00328389	1.20903
					ENSG00000145337	PYURF	0.0247036	1.35067
					ENSG00000145425	RPS3A	0.00157804	1.09408
					ENSG00000145491	ROPN1L	1.02718e-08	2.53517
					ENSG00000145494	NDUFS6	0.000338327	1.93345
					ENSG00000145592	RPL37	0.000842602	1.30803
					ENSG00000145623	OSMR	0.0062647	-1.10726
					ENSG00000145687	SSBP2	0.0179984	1.61531
					ENSG00000145703	IQGAP2	0.00261201	3.01851
					ENSG00000145715	RASA1	0.00152701	-1.28582
					ENSG00000145833	DDX46	0.00569844	1.58644
					ENSG00000145860	RNF145	0.0123896	1.35106
					ENSG00000145990	GFOD1	0.02735	1.23016
					ENSG00000146066	HIGD2A	0.00239505	1.04222
					ENSG00000146090	RASGEF1C	0.0204668	2.0878
					ENSG00000146197	SCUBE3	0.0392615	2.16739
					ENSG00000146221	DRC5	7.17292e-05	2.66437
					ENSG00000146223	RPL7L1	0.018255	1.15556
					ENSG00000146247	PHIP	0.00362342	1.92508
					ENSG00000146411	SLC2A12	0.00548438	-1.47059
					ENSG00000146414	SHPRH	0.00207796	-1.31061
					ENSG00000146540	CHLSN	0.00101721	1.2446
					ENSG00000146555	SDK1	0.000155029	2.42395
					ENSG00000146648	EGFR	0.001285	-1.30626
					ENSG00000146677	RPL32P18	0.0291528	1.55163
					ENSG00000146701	MDH2	0.00109823	1.01903
					ENSG00000146707	POMZP3	0.00482966	1.60735
					ENSG00000146858	ZC3HAV1L	0.00564592	-1.17439
					ENSG00000146955	RAB19	0.0160369	-1.96061
					ENSG00000147065	MSN	0.00160477	2.88371
					ENSG00000147123	NDUFB11	0.000196459	1.95829
					ENSG00000147124	ZNF41	0.00788636	-1.24743
					ENSG00000147155	EBP	0.0044743	1.03851
					ENSG00000147174	GCNA	0.0498489	-1.88884
					ENSG00000147202	DIAPH2	0.0365031	1.02039
					ENSG00000147408	CSGALNACT1	0.00531039	-1.11738
					ENSG00000147419	CCDC25	0.00374666	1.64702
					ENSG00000147601	TERF1	0.0191093	1.17477
					ENSG00000147642	SYBU	0.00134108	2.30673
					ENSG00000147649	MTDH	0.0072526	1.56792
					ENSG00000147684	NDUFB9	0.000513531	1.55234
					ENSG00000147689	FAM83A	0.0110776	1.12126
					ENSG00000147862	NFIB	0.000376905	2.42701
					ENSG00000148019	CEP78	0.0266631	1.07883
					ENSG00000148053	NTRK2	0.00744829	3.23181
					ENSG00000148082	SHC3	0.026364	-1.84229
					ENSG00000148180	GSN	0.00111969	1.18589
					ENSG00000148346	LCN2	3.20856e-05	1.12854
					ENSG00000148362		0.00132916	1.36047
					ENSG00000148429	USP6NL	0.00278974	-1.03979
					ENSG00000148444	COMMD3	0.00246903	1.29751
					ENSG00000148498	PARD3	0.0363546	1.10447
					ENSG00000148690	FRA10AC1	0.00718138	1.49746
					ENSG00000148735	PLEKHS1	0.00544101	1.22389
					ENSG00000148803	FUOM	0.00141747	1.92136
					ENSG00000148834	GSTO1	0.00129702	1.39341
					ENSG00000148950	IMMP1L	0.0195244	1.1538
					ENSG00000148965	SAA4	0.00248208	2.02944
					ENSG00000149021	SCGB1A1	1.48043e-13	4.1818
					ENSG00000149201	CCDC81	0.0060251	2.07436
					ENSG00000149292	TTC12	0.00439075	1.10663
					ENSG00000149328	GLB1L2	0.000601098	1.42105
					ENSG00000149527	PLCH2	0.0441082	1.04477
					ENSG00000149531	FRG1BP	0.0220076	1.37885
					ENSG00000149541	B3GAT3	0.000572907	1.2949
					ENSG00000149547	EI24	0.00259709	1.4995
					ENSG00000149548	CCDC15	0.0218039	1.35274
					ENSG00000149636	DSN1	0.00875184	1.33976
					ENSG00000149639	MTCL2	0.00465982	-1.08019
					ENSG00000149806	FAU	0.000220178	1.99762
					ENSG00000149932	TMEM219	0.000352968	1.76514
					ENSG00000150093	ITGB1	0.00745061	-1.19418
					ENSG00000150627	WDR17	0.0264747	-1.83998
					ENSG00000150628	SPATA4	0.00341685	2.79393
					ENSG00000150760	DOCK1	0.00479594	-1.29101
					ENSG00000150773	PIH1D2	0.00212209	1.62954
					ENSG00000150779	TIMM8B	0.00326896	1.21617
					ENSG00000150782	IL18	0.00848539	1.08291
					ENSG00000150907	FOXO1	0.018537	1.72932
					ENSG00000151023	ENKUR	4.6615e-05	2.91
					ENSG00000151065	DCP1B	0.00662993	2.39227
					ENSG00000151116	UEVLD	0.0179251	1.27698
					ENSG00000151208	DLG5	0.0103555	-1.55737
					ENSG00000151327	FAM177A1	0.00929651	1.01809
					ENSG00000151338	MIPOL1	0.000194573	3.58115
					ENSG00000151353	TMEM18	0.00393829	1.07465
					ENSG00000151366	NDUFC2	0.000485078	2.24368
					ENSG00000151388	ADAMTS12	0.0348236	-1.16869
					ENSG00000151458	ANKRD50	0.00131451	-1.01969
					ENSG00000151575	TEX9	0.000690894	1.42475
					ENSG00000151632	AKR1C2	2.7287e-05	2.6869
					ENSG00000151657	KIN	0.0282927	1.07024
					ENSG00000151692	RNF144A	0.00313469	-1.39712
					ENSG00000151693	ASAP2	0.00269479	-1.74724
					ENSG00000151694	ADAM17	0.0125154	-1.61158
					ENSG00000151715	TMEM45B	0.000467872	2.09079
					ENSG00000151718	WWC2	0.001208	-1.4437
					ENSG00000151849	CPAP	0.0167262	-1.13159
					ENSG00000151914	DST	0.000124072	-1.12175
					ENSG00000152056	AP1S3	0.00687977	1.80796
					ENSG00000152076	CCDC74B	0.000884655	1.87446
					ENSG00000152082	MZT2B	0.000353214	1.68674
					ENSG00000152104	PTPN14	0.0175359	1.57223
					ENSG00000152127	MGAT5	0.00222047	-1.06561
					ENSG00000152192	POU4F1	0.0404696	-1.05264
					ENSG00000152348	ATG10	0.00744945	1.34207
					ENSG00000152380	FAM151B	0.0408412	1.0478
					ENSG00000152404	CWF19L2	0.00292044	1.81654
					ENSG00000152439	ZNF773	0.00455053	1.86772
					ENSG00000152443	ZNF776	0.00512975	-1.07565
					ENSG00000152457	DCLRE1C	0.00499353	1.85935
					ENSG00000152465	NMT2	0.010856	1.42773
					ENSG00000152503	TRIM36	0.00116429	-1.65719
					ENSG00000152582	SPEF2	0.00265372	1.53789
					ENSG00000152611	CAPSL	1.06936e-06	3.17774
					ENSG00000152760	DYNLT5	5.09337e-05	3.41917
					ENSG00000152763	DNAI4	0.00063517	1.66634
					ENSG00000152766	ANKRD22	0.0142956	1.39033
					ENSG00000152818	UTRN	0.000562529	-1.37237
					ENSG00000152894	PTPRK	0.000352968	-1.02954
					ENSG00000152939	MARVELD2	0.0259448	1.06768
					ENSG00000153006	SREK1IP1	0.00121505	2.19911
					ENSG00000153046	CDYL	0.0310229	1.14697
					ENSG00000153107	ANAPC1	0.000540438	-1.02016
					ENSG00000153132	CLGN	0.0492074	1.85012
					ENSG00000153140	CETN3	0.0135076	1.0963
					ENSG00000153237	CCDC148	0.00568678	2.59622
					ENSG00000153250	RBMS1	0.0244026	1.0223
					ENSG00000153347	FAM81B	5.69747e-10	3.65356
					ENSG00000153363	LINC00467	0.000956003	1.8462
					ENSG00000153446	C16orf89	9.17828e-05	4.01068
					ENSG00000153789	CIBAR2	1.34822e-07	3.23902
					ENSG00000153822	KCNJ16	0.00939177	2.74027
					ENSG00000153914	SREK1	0.00517169	1.70399
					ENSG00000153982	GDPD1	0.00109511	2.52403
					ENSG00000153993	SEMA3D	9.71956e-05	-1.11736
					ENSG00000154079	SDHAF4	0.00208726	1.31836
					ENSG00000154080	CHST9	1.94575e-08	3.22306
					ENSG00000154099	DNAAF1	3.40855e-09	3.14126
					ENSG00000154102	C16orf74	0.00372519	1.18332
					ENSG00000154479	CFAP210	1.14615e-06	3.40911
					ENSG00000154518	ATP5MC3	0.00116177	1.06902
					ENSG00000154639	CXADR	0.0148811	1.46311
					ENSG00000154734	ADAMTS1	0.0141552	-1.04549
					ENSG00000154898	CCDC144CP	0.00547368	2.74327
					ENSG00000155026	RSPH10B	0.00504965	3.32445
					ENSG00000155085	AK9	0.00209117	1.56605
					ENSG00000155093	PTPRN2	0.000929482	2.35844
					ENSG00000155367	PPM1J	0.00028279	1.54656
					ENSG00000155368	DBI	0.000594092	1.53313
					ENSG00000155761	SPAG17	0.000136406	3.1362
					ENSG00000155957	TMBIM4	0.00313128	1.12452
					ENSG00000156042	CFAP70	0.0105147	1.71571
					ENSG00000156049	GNA14	0.0004878	3.40254
					ENSG00000156140	ADAMTS3	0.0155785	-1.00405
					ENSG00000156206	CFAP161	0.000478388	2.65473
					ENSG00000156218	ADAMTSL3	0.00695631	-1.1737
					ENSG00000156273	BACH1	0.000232467	-1.01075
					ENSG00000156381	ANKRD9	0.000928997	1.1097
					ENSG00000156411	ATP5MJ	0.00120769	1.42566
					ENSG00000156413	FUT6	0.00234701	2.74237
					ENSG00000156467	UQCRB	0.00091018	1.46421
					ENSG00000156603	MED19	0.00086902	1.88872
					ENSG00000156675	RAB11FIP1	0.00244767	-1.15321
					ENSG00000156869	FRRS1	0.0173211	-1.64294
					ENSG00000156966	B3GNT7	0.000398833	1.4757
					ENSG00000156968	MPV17L	0.000917463	4.13703
					ENSG00000156970	BUB1B	0.00467599	-1.05344
					ENSG00000157077	ZFYVE9	0.0262097	-1.0977
					ENSG00000157106	SMG1	0.000124219	-1.14307
					ENSG00000157107	FCHO2	0.00259614	-1.01104
					ENSG00000157184	CPT2	0.026486	1.06199
					ENSG00000157259	GATAD1	0.0108619	1.30519
					ENSG00000157306	ZFHX2-AS1	0.00502012	2.52564
					ENSG00000157330	CFAP107	0.000609136	2.75949
					ENSG00000157483	MYO1E	0.0108073	-1.11252
					ENSG00000157578	LCA5L	0.0111907	1.96462
					ENSG00000157734	SNX22	0.00132287	1.33347
					ENSG00000157765	SLC34A2	2.68295e-10	2.83115
					ENSG00000157778	PSMG3	0.0004878	1.4118
					ENSG00000157856	DRC1	9.79003e-07	3.18277
					ENSG00000157873	TNFRSF14	0.00873726	1.08807
					ENSG00000157895	C12orf43	0.0027822	1.72079
					ENSG00000157999	ANKRD61	0.00969521	2.61381
					ENSG00000158008	EXTL1	0.00151582	1.30138
					ENSG00000158055	GRHL3	0.0480996	-1.13585
					ENSG00000158113	LRRC43	8.977e-07	3.4669
					ENSG00000158286	RNF207	0.0142918	-1.02
					ENSG00000158321	AUTS2	0.00224468	2.22838
					ENSG00000158406	H4C8	0.0217952	1.62529
					ENSG00000158417	EIF5B	0.000324243	2.41966
					ENSG00000158423	RIBC1	0.010583	1.24017
					ENSG00000158428	CATIP	4.97557e-06	3.89206
					ENSG00000158458	NRG2	0.0351412	1.70628
					ENSG00000158467	AHCYL2	0.0194815	-1.00987
					ENSG00000158470	B4GALT5	0.00749374	-1.16014
					ENSG00000158486	DNAH3	0.00144834	1.88821
					ENSG00000158552	ZFAND2B	0.000530712	1.8867
					ENSG00000158691	ZSCAN12	0.00252064	-1.14327
					ENSG00000158716	DUSP23	0.000186076	1.72095
					ENSG00000158747	NBL1	0.000281314	1.86311
					ENSG00000158813	EDA	0.0299632	-1.14237
					ENSG00000159023	EPB41	0.00677796	-1.25579
					ENSG00000159055	MIS18A	0.00381667	1.39188
					ENSG00000159140	SON	0.02735	1.13306
					ENSG00000159167	STC1	0.0238382	1.28836
					ENSG00000159199	ATP5MC1	0.00124717	1.16813
					ENSG00000159210	SNF8	0.00353541	1.17941
					ENSG00000159212	CLIC6	1.68126e-05	2.15701
					ENSG00000159239		2.59621e-06	1.7793
					ENSG00000159335	PTMS	0.0004878	1.71703
					ENSG00000159459	UBR1	0.00520405	-1.30109
					ENSG00000159588	CCDC17	3.95189e-08	2.92468
					ENSG00000159625	DRC7	1.89348e-06	2.79949
					ENSG00000159648	SPMIP8	0.00438644	1.31265
					ENSG00000159674	SPON2	0.000129446	2.05287
					ENSG00000159708	LRRC36	0.000746584	4.12166
					ENSG00000159713	TPPP3	1.89284e-09	3.20692
					ENSG00000159714	ZDHHC1	5.09337e-05	1.62479
					ENSG00000159905	ZNF221	0.000249434	-3.00236
					ENSG00000160013	PTGIR	0.0230387	2.1546
					ENSG00000160049	DFFA	0.00338924	1.44307
					ENSG00000160050	CCDC28B	0.00547368	1.36993
					ENSG00000160062	ZBTB8A	0.00202939	2.1048
					ENSG00000160072	ATAD3B	0.00182053	1.04457
					ENSG00000160097	FNDC5	0.023296	2.51874
					ENSG00000160180	TFF3	0.015574	3.18307
					ENSG00000160183	TMPRSS3	0.00940362	1.60234
					ENSG00000160188	RSPH1	1.97986e-09	2.80783
					ENSG00000160201	U2AF1	0.0289819	2.4519
					ENSG00000160213	CSTB	0.000630989	1.11061
					ENSG00000160218	TRAPPC10	0.00143759	-1.64018
					ENSG00000160221	GATD3	0.0250854	1.74735
					ENSG00000160226	CFAP410	0.0100171	1.09408
					ENSG00000160256	SLX9	0.00140903	1.26825
					ENSG00000160284	SPATC1L	0.00214944	1.14947
					ENSG00000160294	MCM3AP	0.0436416	-1.08736
					ENSG00000160325	CACFD1	0.00199315	1.20727
					ENSG00000160345	PIERCE1	0.000451192	1.61865
					ENSG00000160352	ZNF714	0.00800765	1.71621
					ENSG00000160401	CFAP157	9.0727e-05	2.06477
					ENSG00000160472	TMEM190	5.75572e-13	3.68677
					ENSG00000160551	TAOK1	0.000101323	-1.00733
					ENSG00000160602	NEK8	0.00565695	1.57686
					ENSG00000160712	IL6R	0.0385771	1.13874
					ENSG00000160783	PMF1	0.000649083	1.52989
					ENSG00000160801	PTH1R	0.00798539	1.52365
					ENSG00000160813	PPP1R35	0.00223795	1.30661
					ENSG00000160818	GPATCH4	0.00671574	1.24134
					ENSG00000160838	LRRC71	0.000290447	2.28641
					ENSG00000160862	AZGP1	0.000425856	4.07749
					ENSG00000160991	ORAI2	0.00857621	1.14267
					ENSG00000161055	SCGB3A1	5.99584e-17	5.21615
					ENSG00000161149		0.0253219	1.25947
					ENSG00000161328	LRRC56	0.00270796	1.28269
					ENSG00000161513	FDXR	0.000307977	1.31452
					ENSG00000161677	JOSD2	5.68443e-05	2.20518
					ENSG00000161798	AQP5	0.000112899	2.9286
					ENSG00000161888	SPC24	0.00146964	1.48947
					ENSG00000161905	ALOX15	0.0449853	2.36375
					ENSG00000161958	FGF11	0.0160369	-1.52325
					ENSG00000161970	RPL26	0.00114707	1.28155
					ENSG00000161980	POLR3K	0.000900115	1.29337
					ENSG00000162004	CCDC78	2.09256e-07	2.78401
					ENSG00000162040	HS3ST6	0.00509923	2.20381
					ENSG00000162078	ZG16B	0.0278777	1.27708
					ENSG00000162139	NEU3	0.00777706	-1.22631
					ENSG00000162148	SAXO4	0.00221535	1.87154
					ENSG00000162191	UBXN1	0.000884655	1.0993
					ENSG00000162402	USP24	0.000266916	-1.211
					ENSG00000162409	PRKAA2	0.024268	1.81678
					ENSG00000162444	RBP7	0.00149073	1.15923
					ENSG00000162496	DHRS3	0.000357914	1.02431
					ENSG00000162510	MATN1	0.02464	2.29866
					ENSG00000162543	UBXN10	4.89022e-06	2.83916
					ENSG00000162545	CAMK2N1	0.00162402	1.61909
					ENSG00000162551	ALPL	0.0397148	1.01275
					ENSG00000162552	WNT4	0.00238181	1.0255
					ENSG00000162571	TTLL10	3.86677e-05	2.20278
					ENSG00000162585	FAAP20	0.000616804	1.41771
					ENSG00000162598	C1orf87	3.8547e-05	3.53739
					ENSG00000162599	NFIA	0.00235711	2.05437
					ENSG00000162614	NEXN	0.00523144	3.32232
					ENSG00000162620	LRRIQ3	0.0321139	1.90448
					ENSG00000162643	DNAI3	0.00328892	1.74165
					ENSG00000162755	KLHDC9	0.00652256	1.0928
					ENSG00000162813	BPNT1	0.00142253	1.3177
					ENSG00000162814	SPATA17	5.73381e-05	2.89188
					ENSG00000162885	B3GALNT2	0.00842207	-1.04012
					ENSG00000162888	IKBKE-AS1	0.010225	-3.14358
					ENSG00000162896	PIGR	4.61772e-05	2.69153
					ENSG00000162910	MRPL55	0.000308973	1.68411
					ENSG00000162944	RFTN2	0.00532783	3.91216
					ENSG00000162949	CAPN13	2.98354e-05	3.15483
					ENSG00000163040	CCDC74A	3.7137e-05	2.05591
					ENSG00000163060	TEKT4	1.04702e-05	3.09539
					ENSG00000163071	SPATA18	2.22329e-07	2.84416
					ENSG00000163075	CFAP221	2.78204e-06	3.05675
					ENSG00000163082	SGPP2	0.00449192	1.86048
					ENSG00000163093	BBS5	0.00083701	1.86291
					ENSG00000163104	SMARCAD1	0.000224272	-1.10917
					ENSG00000163110	PDLIM5	0.0381062	1.14761
					ENSG00000163141	BNIPL	0.0085798	2.03795
					ENSG00000163216	SPRR2D	0.0464301	1.15639
					ENSG00000163220	S100A9	0.00127369	1.27533
					ENSG00000163263	CFAP141	1.82475e-05	4.56036
					ENSG00000163344	PMVK	0.000230371	1.68652
					ENSG00000163412	EIF4E3	0.00996583	2.16378
					ENSG00000163428	LRRC58	0.00963763	1.63059
					ENSG00000163453	IGFBP7	0.0025251	1.39727
					ENSG00000163481	RNF25	0.00185435	1.24538
					ENSG00000163491	NEK10	0.000522909	2.37809
					ENSG00000163520	FBLN2	0.0160315	1.97862
					ENSG00000163535	SGO2	0.0210659	1.2658
					ENSG00000163576	EFHB	9.14722e-06	2.94203
					ENSG00000163584	RPL22L1	0.00685355	1.25659
					ENSG00000163596	ICA1L	0.000391672	2.20928
					ENSG00000163617	CCDC191	0.0101769	1.28864
					ENSG00000163625	WDFY3	0.00021406	-1.06529
					ENSG00000163629	PTPN13	0.000351106	-1.46275
					ENSG00000163644	PPM1K	0.00542219	1.60254
					ENSG00000163682	RPL9	0.000986641	1.3338
					ENSG00000163694	RBM47	0.0396438	1.05508
					ENSG00000163702	IL17RC	0.00374776	1.02078
					ENSG00000163704	PRRT3	0.0125564	1.53707
					ENSG00000163755	HPS3	0.0301283	-1.08543
					ENSG00000163798	SLC4A1AP	0.0113726	1.23561
					ENSG00000163820	FYCO1	0.00465544	-1.18935
					ENSG00000163872	YEATS2	0.0152787	-1.0614
					ENSG00000163879	DNALI1	3.0202e-07	2.96826
					ENSG00000163885	CFAP100	2.82641e-10	3.50584
					ENSG00000163900	TMEM41A	0.00281406	1.69325
					ENSG00000163964	PIGX	0.00945914	1.42729
					ENSG00000163993	S100P	3.82487e-05	2.58943
					ENSG00000164022	AIMP1	0.00316936	1.68415
					ENSG00000164056	SPRY1	0.0103913	1.81639
					ENSG00000164066	INTU	0.00489246	1.81969
					ENSG00000164068	RNF123	0.0412281	-1.00491
					ENSG00000164099	PRSS12	1.4385e-07	2.68182
					ENSG00000164114	MAP9	0.00091018	2.45226
					ENSG00000164125	GASK1B	0.00534559	-1.96151
					ENSG00000164142	FHIP1A	0.00787332	-1.0569
					ENSG00000164151	ICE1	0.00102094	-1.09598
					ENSG00000164168	TMEM184C	0.00331362	-1.14447
					ENSG00000164185	ZNF474	0.00108268	3.07792
					ENSG00000164221	CCDC112	0.00857621	1.60766
					ENSG00000164236	ANKRD33B	0.00357388	-1.17057
					ENSG00000164287	CDC20B	0.000553033	2.39897
					ENSG00000164308	ERAP2	0.0191687	1.21962
					ENSG00000164405	UQCRQ	0.000173879	1.90231
					ENSG00000164587	RPS14	0.0004878	1.6102
					ENSG00000164609	SLU7	0.0108592	1.47411
					ENSG00000164610	RP9	0.00058064	1.86289
					ENSG00000164611	PTTG1	0.00125311	1.24112
					ENSG00000164627	KIF6	0.00665406	1.92959
					ENSG00000164649	CDCA7L	0.0182251	-1.18759
					ENSG00000164659	ELAPOR2	0.00391098	-1.19158
					ENSG00000164675	IQUB	0.000812893	3.61618
					ENSG00000164683	HEY1	0.0150155	2.21645
					ENSG00000164687	FABP5	0.000587286	1.37422
					ENSG00000164713	BRI3	0.000516644	1.33098
					ENSG00000164746	C7orf57	0.0100869	1.77598
					ENSG00000164845	FAM86FP	0.0473276	-1.33227
					ENSG00000164885	CDK5	0.0024163	1.0006
					ENSG00000164896	FASTK	0.000565829	1.10753
					ENSG00000164897	TMUB1	0.00070981	1.37851
					ENSG00000164902	PHAX	0.00972288	1.39393
					ENSG00000164919	COX6C	4.10306e-05	2.39451
					ENSG00000164929	BAALC	0.0101599	2.16564
					ENSG00000164972	SPMIP6	1.33869e-12	3.78878
					ENSG00000164985	PSIP1	0.0146738	1.2019
					ENSG00000164989	CCDC171	0.0340788	-1.04257
					ENSG00000165055	METTL2B	0.0121821	1.19976
					ENSG00000165092	ALDH1A1	7.13259e-07	2.52528
					ENSG00000165097	KDM1B	0.00136877	-1.29473
					ENSG00000165113	GKAP1	0.0038127	1.95847
					ENSG00000165124	SVEP1	0.0101906	2.20659
					ENSG00000165152	PGAP4	0.0010488	2.77199
					ENSG00000165164	CFAP47	0.0159458	2.56789
					ENSG00000165171	METTL27	1.73263e-06	2.64198
					ENSG00000165240	ATP7A	0.00679828	-1.05623
					ENSG00000165264	NDUFB6	0.000281314	1.36806
					ENSG00000165272	AQP3	9.6603e-05	1.359
					ENSG00000165288	BRWD3	2.19341e-05	-1.03198
					ENSG00000165309	ARMC3	2.08035e-06	3.24594
					ENSG00000165338	HECTD2	0.00596969	-1.39901
					ENSG00000165355	FBXO33	0.0163207	1.22254
					ENSG00000165392	WRN	0.00447579	-1.15715
					ENSG00000165434	PGM2L1	0.010904	1.43815
					ENSG00000165502	RPL36AL	0.00070719	1.539
					ENSG00000165525	NEMF	0.000882677	2.1047
					ENSG00000165568	AKR1E2	0.00978082	1.41045
					ENSG00000165572	KBTBD6	0.0297612	1.2741
					ENSG00000165632	TAF3	0.000313721	2.80293
					ENSG00000165644	COMTD1	0.000186076	2.03109
					ENSG00000165671	NSD1	0.0028325	-1.29457
					ENSG00000165695	AK8	3.54116e-05	2.56027
					ENSG00000165698	SPACA9	0.000324243	1.57351
					ENSG00000165732	DDX21	0.0191687	1.27219
					ENSG00000165752	STK32C	0.00123907	1.26677
					ENSG00000165757	JCAD	0.00315842	-1.2717
					ENSG00000165795	NDRG2	0.00400267	1.02854
					ENSG00000165807	PPP1R36	0.0118234	2.07985
					ENSG00000165816	VWA2	0.00222894	-1.49955
					ENSG00000165895	ARHGAP42	0.000144015	-1.28552
					ENSG00000165929	TC2N	0.0279166	1.20978
					ENSG00000165948	IFI27L1	0.00247804	1.30399
					ENSG00000165949	IFI27	0.00252064	1.66117
					ENSG00000165997	ARL5B	0.000326724	-1.01852
					ENSG00000166136	NDUFB8	0.000616059	1.74614
					ENSG00000166140	ZFYVE19	0.00243364	1.04143
					ENSG00000166165	CKB	3.92047e-05	1.89383
					ENSG00000166171	DPCD	0.000619443	1.36227
					ENSG00000166225	FRS2	0.00237244	-1.02105
					ENSG00000166246	DNAAF8	0.000398833	1.85622
					ENSG00000166275	BORCS7	0.000331932	2.71997
					ENSG00000166295	ANAPC16	0.0019066	1.38618
					ENSG00000166311	SMPD1	0.0137452	1.08554
					ENSG00000166337	TAF10	0.000246334	1.04365
					ENSG00000166348	USP54	0.00287871	-1.24053
					ENSG00000166352	IFTAP	0.00566471	1.21433
					ENSG00000166402	TUB	0.00525078	-1.01944
					ENSG00000166411	IDH3A	0.0198843	-1.37691
					ENSG00000166436	TRIM66	0.00471463	-1.23554
					ENSG00000166439	RNF169	0.00458095	-1.46109
					ENSG00000166441	RPL27A	0.000266075	1.77266
					ENSG00000166582	CENPV	0.00667808	1.05478
					ENSG00000166592	RRAD	1.97986e-09	2.45198
					ENSG00000166596	CFAP52	2.08035e-06	2.45398
					ENSG00000166681	BEX3	0.00175589	1.17862
					ENSG00000166741	NNMT	0.00145717	1.15479
					ENSG00000166743	ACSM1	0.00628885	1.97664
					ENSG00000166762	CATSPER2	0.0392538	1.18426
					ENSG00000166780	BMERB1	0.0255953	2.02759
					ENSG00000166803	PCLAF	0.00300576	1.75801
					ENSG00000166823	MESP1	0.000124385	1.80769
					ENSG00000166828	SCNN1G	0.000143286	4.16655
					ENSG00000166845	C18orf54	0.0331796	-1.11984
					ENSG00000166869	CHP2	0.00535653	3.00325
					ENSG00000166881	NEMP1	0.00184678	-1.13242
					ENSG00000166889	PATL1	0.0128674	-1.00289
					ENSG00000166913	YWHAB	0.000928073	2.07336
					ENSG00000166920	COXFA4L3	0.000931049	1.49317
					ENSG00000166922	SCG5	0.0435219	1.88213
					ENSG00000166959	MS4A8	7.99276e-08	3.06088
					ENSG00000166963	MAP1A	0.000335016	2.19161
					ENSG00000166979	EVA1C	0.00175373	1.60715
					ENSG00000167065	DUSP18	0.000450147	2.57099
					ENSG00000167094	TTC16	2.77283e-05	3.59388
					ENSG00000167193	CRK	0.0109253	1.32217
					ENSG00000167216	KATNAL2	0.0150322	2.35095
					ENSG00000167232	ZNF91	0.00946993	1.6437
					ENSG00000167283	ATP5MG	0.00134075	1.34549
					ENSG00000167371	PRRT2	0.00650504	1.31146
					ENSG00000167377	ZNF23	0.000381747	-2.11949
					ENSG00000167393	PPP2R3B	0.00141747	1.44188
					ENSG00000167468	GPX4	0.000314876	1.54658
					ENSG00000167508	MVD	0.00535335	1.08324
					ENSG00000167522	ANKRD11	0.0172237	1.04917
					ENSG00000167526	RPL13	0.000425856	1.57066
					ENSG00000167543	TP53I13	0.000587286	1.81323
					ENSG00000167548	KMT2D	0.009818	-1.03721
					ENSG00000167552	TUBA1A	2.21714e-05	1.40818
					ENSG00000167578	RAB4B	0.0242159	1.27235
					ENSG00000167608	TMC4	8.29833e-05	1.09837
					ENSG00000167614	TTYH1	0.00124689	1.37003
					ENSG00000167617	CDC42EP5	9.6098e-05	2.15328
					ENSG00000167644	C19orf33	5.92842e-05	2.38567
					ENSG00000167646	DNAAF3	0.00162686	1.02945
					ENSG00000167653	PSCA	0.00135648	1.60369
					ENSG00000167657	DAPK3	0.00191055	1.10008
					ENSG00000167676	PLIN4	0.0113724	1.50496
					ENSG00000167700	SLC33A2	0.000438979	1.63672
					ENSG00000167711	SERPINF2	0.00521854	1.17838
					ENSG00000167733	HSD11B1L	0.0129572	1.07249
					ENSG00000167741	GGT6	0.000220224	2.1635
					ENSG00000167757	KLK11	7.21852e-05	2.30243
					ENSG00000167772	ANGPTL4	0.00260065	1.36931
					ENSG00000167775	CD320	0.0021287	1.28515
					ENSG00000167792	NDUFV1	0.00171346	1.25233
					ENSG00000167799	NUDT8	0.00163328	1.31533
					ENSG00000167807		0.00239505	3.51425
					ENSG00000167858	TEKT1	2.21971e-07	3.02629
					ENSG00000167863	ATP5PD	0.000966608	1.29964
					ENSG00000167874	TMEM88	0.0326606	2.66106
					ENSG00000168016	TRANK1	0.00570206	-1.27818
					ENSG00000168026	TTC21A	0.0010158	1.49537
					ENSG00000168028	RPSA	0.000630989	1.38072
					ENSG00000168061	SAC3D1	0.000427642	1.27252
					ENSG00000168071	CCDC88B	0.00134855	1.39818
					ENSG00000168143	FAM83B	0.000194278	-1.51479
					ENSG00000168172	HOOK3	0.0228254	1.40965
					ENSG00000168214	RBPJ	0.0304144	1.14319
					ENSG00000168237	GLYCTK	0.0156643	1.02966
					ENSG00000168255	POLR2J3-UPK3BL2	0.00416437	1.66156
					ENSG00000168269	FOXI1	0.0287922	-1.12362
					ENSG00000168273	UQCC5	0.00105453	1.88561
					ENSG00000168350	DEGS2	0.00313783	1.62433
					ENSG00000168405	CMAHP	1.36256e-05	2.45748
					ENSG00000168447	SCNN1B	2.48162e-06	2.91865
					ENSG00000168490	PHYHIP	0.0380272	1.50111
					ENSG00000168497	CAVIN2	0.00194129	3.98379
					ENSG00000168502	MTCL1	0.0140751	-1.16091
					ENSG00000168589	DYNLRB2	6.09636e-06	3.15763
					ENSG00000168615	ADAM9	0.00139267	-1.15891
					ENSG00000168621	GDNF	0.0237236	1.36127
					ENSG00000168653	NDUFS5	0.0012003	1.44003
					ENSG00000168658	VWA3B	1.1483e-06	2.78322
					ENSG00000168675	LDLRAD4	0.00493489	2.87943
					ENSG00000168701	TMEM208	0.00111969	1.32843
					ENSG00000168743	NPNT	0.041583	2.49105
					ENSG00000168813	ZNF507	0.0113391	-1.177
					ENSG00000168894	RNF181	0.000575873	1.48864
					ENSG00000168899	VAMP5	0.0168665	1.96394
					ENSG00000168906	MAT2A	0.0435973	-1.00832
					ENSG00000168907	PLA2G4F	0.0197156	-1.24373
					ENSG00000169020	ATP5ME	5.69585e-05	2.41581
					ENSG00000169062	UPF3A	0.00292044	1.47156
					ENSG00000169064	ZBBX	5.24062e-06	3.43084
					ENSG00000169071	ROR2	0.00852688	-1.55294
					ENSG00000169126	ODAD2	0.000960999	2.12944
					ENSG00000169189	NSMCE1	0.00114446	1.58455
					ENSG00000169223	LMAN2	0.00258951	1.0016
					ENSG00000169247	SH3TC2	0.0119848	-1.09738
					ENSG00000169288	MRPL1	0.0137836	1.09004
					ENSG00000169314	C22orf15	4.78337e-07	3.28995
					ENSG00000169402	RSPH10B2	0.00170417	2.63309
					ENSG00000169403	PTAFR	0.00188261	1.34838
					ENSG00000169469	SPRR1B	0.00427697	1.35179
					ENSG00000169504	CLIC4	0.00018732	-1.00264
					ENSG00000169509	CRCT1	0.000773452	1.24445
					ENSG00000169550	MUC15	0.000383473	3.23643
					ENSG00000169554	ZEB2	0.0089895	2.2835
					ENSG00000169567	HINT1	0.00121498	1.05261
					ENSG00000169570	DTWD2	0.0193968	-1.27239
					ENSG00000169583	CLIC3	0.00259109	1.21985
					ENSG00000169609	C15orf40	0.0155859	1.11612
					ENSG00000169627	BOLA2B	0.0168031	1.93365
					ENSG00000169629	RGPD8	0.0160964	-1.32153
					ENSG00000169683	LRRC45	0.00091018	1.49199
					ENSG00000169696	ASPSCR1	0.00219328	1.2353
					ENSG00000169715	MT1E	0.00128972	1.4976
					ENSG00000169733	RFNG	0.00159596	1.08017
					ENSG00000169738	DCXR	0.00146169	1.19386
					ENSG00000169750	RAC3	0.00143394	1.47976
					ENSG00000169851	PCDH7	0.00877398	2.34734
					ENSG00000169855	ROBO1	0.0262021	1.67861
					ENSG00000169871	TRIM56	0.00158489	1.75379
					ENSG00000169925	BRD3	0.0337341	1.20927
					ENSG00000169926	KLF13	0.0156687	-1.02901
					ENSG00000169946	ZFPM2	0.0041548	2.30645
					ENSG00000169976	SF3B5	0.000501977	1.57268
					ENSG00000170088	TMEM192	0.011451	1.65548
					ENSG00000170089		0.00575184	1.0232
					ENSG00000170231	FABP6	0.000176989	3.02852
					ENSG00000170264	FAM161A	0.0060511	1.82922
					ENSG00000170291	ELP5	0.00174068	1.12402
					ENSG00000170310	STX8	0.00403897	1.1021
					ENSG00000170324	FRMPD2	0.000768416	2.25506
					ENSG00000170379	TCAF2	0.0308727	-1.07056
					ENSG00000170430	MGMT	0.000478652	1.67203
					ENSG00000170471	RALGAPB	8.19772e-05	-1.02397
					ENSG00000170482	SLC23A1	0.00334507	1.84662
					ENSG00000170498	KISS1	0.000164562	2.27033
					ENSG00000170522	ELOVL6	0.00553585	-1.03828
					ENSG00000170561	IRX2	0.00526362	1.04953
					ENSG00000170577	SIX2	0.00571648	1.86941
					ENSG00000170684	ZNF296	0.0100489	1.26356
					ENSG00000170786	SDR16C5	0.000427642	3.21374
					ENSG00000170832	USP32	0.0036466	-1.21045
					ENSG00000170873	MTSS1	0.000584294	1.7402
					ENSG00000170889	RPS9	0.000948501	1.38619
					ENSG00000170906	NDUFA3	0.000960999	1.6515
					ENSG00000170919	TPT1-AS1	0.0073874	1.08133
					ENSG00000170921	TANC2	0.00114734	-1.34614
					ENSG00000170927	PKHD1	0.0441106	-1.74262
					ENSG00000171094	ALK	0.0108194	2.39196
					ENSG00000171119	NRTN	0.000195171	3.11188
					ENSG00000171159	BBLN	0.00129134	1.52317
					ENSG00000171189	GRIK1	0.0208249	2.37165
					ENSG00000171222	SCAND1	6.40114e-05	2.37495
					ENSG00000171316	CHD7	0.0170707	1.41803
					ENSG00000171346	KRT15	0.000598008	1.30432
					ENSG00000171368	TPPP	0.0292925	1.25556
					ENSG00000171401	KRT13	0.000576894	1.859
					ENSG00000171425	ZNF581	0.00034052	1.59096
					ENSG00000171443	ZNF524	0.000170817	1.9062
					ENSG00000171466	ZNF562	0.0117353	1.44963
					ENSG00000171517	LPAR3	0.001495	2.42343
					ENSG00000171530	TBCA	0.00172667	1.30136
					ENSG00000171533	MAP6	0.00167519	1.55761
					ENSG00000171595	DNAI2	2.91009e-07	3.09611
					ENSG00000171695	LKAAEAR1	0.00573961	2.00471
					ENSG00000171757	LRRC34	0.027854	2.06547
					ENSG00000171798	KNDC1	1.36256e-05	2.80572
					ENSG00000171811	CFAP46	6.77289e-05	3.01078
					ENSG00000171827	ZNF570	0.0181421	1.54252
					ENSG00000171855	IFNB1	0.0489718	1.093
					ENSG00000171858	RPS21	9.5663e-05	2.37372
					ENSG00000171903	CYP4F11	0.0408082	2.15034
					ENSG00000171940	ZNF217	0.00128082	-1.12765
					ENSG00000171943	SRGAP2C	0.013626	1.27424
					ENSG00000171956	FOXB1	0.0308132	1.12028
					ENSG00000171962	DRC3	0.000601093	1.42056
					ENSG00000172005	MAL	0.000705558	1.40842
					ENSG00000172113	NME6	0.00131683	1.24276
					ENSG00000172164	SNTB1	0.0157239	2.47868
					ENSG00000172183	ISG20	0.000630989	1.45774
					ENSG00000172197	MBOAT1	0.0155396	-1.59399
					ENSG00000172349	IL16	0.00678509	2.92112
					ENSG00000172361	CFAP53	3.0202e-07	2.99719
					ENSG00000172366	MCRIP2	0.00028279	1.8625
					ENSG00000172382	PRSS27	0.0222722	1.41573
					ENSG00000172426	RSPH9	1.27137e-05	2.22743
					ENSG00000172428	COPS9	0.000160532	2.34853
					ENSG00000172469	MANEA	0.00231472	-1.17297
					ENSG00000172575	RASGRP1	0.0270923	1.93701
					ENSG00000172578	KLHL6	8.19772e-05	2.5769
					ENSG00000172586	CHCHD1	0.000491642	1.41178
					ENSG00000172590	MRPL52	0.000421734	1.55492
					ENSG00000172663	TMEM134	0.000655417	1.55127
					ENSG00000172771	EFCAB12	0.000276809	2.67241
					ENSG00000172789	HOXC5	0.0401497	-3.89196
					ENSG00000172809	RPL38	0.000486928	1.70688
					ENSG00000172840	PDP2	0.00352533	1.98949
					ENSG00000172869	DMXL1	0.000365139	-1.23098
					ENSG00000172889	EGFL7	0.000924103	1.17974
					ENSG00000172915	NBEA	0.0225982	2.0083
					ENSG00000172922	RNASEH2C	0.000431923	1.71178
					ENSG00000172955	ADH6	0.0036171	3.51563
					ENSG00000173013	CFAP184	0.00119738	1.25394
					ENSG00000173113	TRMT112	0.00179219	1.07314
					ENSG00000173137	ADCK5	0.00140543	1.01384
					ENSG00000173141	MRPL57	0.000837484	1.18174
					ENSG00000173156	RHOD	0.00120769	1.2106
					ENSG00000173166	RAPH1	0.00340929	-1.13609
					ENSG00000173267	SNCG	0.000248655	2.1405
					ENSG00000173272	MZT2A	0.000792408	1.62498
					ENSG00000173275	ZNF449	0.00195361	-1.35688
					ENSG00000173276	ZBTB21	0.000772003	-1.20629
					ENSG00000173338	KCNK7	0.010944	2.42932
					ENSG00000173432	SAA1	0.000513531	1.81804
					ENSG00000173436	MICOS10	0.00225911	1.50802
					ENSG00000173457	PPP1R14B	0.00122693	1.18716
					ENSG00000173467	AGR3	2.35626e-06	3.56442
					ENSG00000173482	PTPRM	0.00881008	-1.15487
					ENSG00000173486	FKBP2	0.000310492	1.70757
					ENSG00000173567	ADGRF3	0.0325221	-2.14812
					ENSG00000173621	LRFN4	0.00223795	1.1582
					ENSG00000173627	APOBEC4	0.00155284	3.20074
					ENSG00000173660	UQCRH	0.000902968	1.05937
					ENSG00000173692	PSMD1	0.00119253	2.21246
					ENSG00000173702	MUC13	0.00157804	2.52727
					ENSG00000173727	FAUP4	0.000204692	2.62893
					ENSG00000173818	ENDOV	0.00134075	1.18002
					ENSG00000173838	MARCHF10	0.01374	1.47783
					ENSG00000173875	ZNF791	0.0030971	1.80333
					ENSG00000173889	PHC3	0.00182071	-1.02194
					ENSG00000173915	ATP5MK	0.000738887	1.30429
					ENSG00000173947	CIMAP3	4.20912e-08	2.68464
					ENSG00000173992	CCS	0.00082756	1.39755
					ENSG00000174028	FAM3C2P	0.0136984	-1.77419
					ENSG00000174130	TLR6	0.000808529	-1.19143
					ENSG00000174132	FAM174A	0.000100054	1.36955
					ENSG00000174173	TRMT10C	0.00908538	1.27919
					ENSG00000174276	ZNHIT2	0.000865405	1.36327
					ENSG00000174365	SNHG11	0.00154263	1.10643
					ENSG00000174437	ATP2A2	0.016655	-1.02962
					ENSG00000174501	ANKRD36C	0.000264443	3.17489
					ENSG00000174514	SLC60A1	0.031794	2.04096
					ENSG00000174547	MRPL11	0.00157804	1.10419
					ENSG00000174720	LARP7	0.00140928	1.79531
					ENSG00000174776	WDR49	0.000432451	2.19773
					ENSG00000174780	SRP72	0.0142681	1.28679
					ENSG00000174844	DNAH12	4.58468e-06	2.86441
					ENSG00000174886	NDUFA11	0.00021759	2.11458
					ENSG00000174891	RSRC1	0.0188873	1.15401
					ENSG00000174898	CATSPERD	0.000430177	3.52261
					ENSG00000174917	MICOS13	0.000801714	1.4236
					ENSG00000174938	SEZ6L2	0.00571521	1.39518
					ENSG00000174939	ASPHD1	0.00769587	1.15463
					ENSG00000174950	CD164L2	6.66812e-05	2.17355
					ENSG00000174977	PAIP1P2	0.00827751	1.2281
					ENSG00000175106	TVP23C	0.00139446	1.09501
					ENSG00000175164	ABO	0.0179984	2.13509
					ENSG00000175267	VWA3A	0.000239776	2.77799
					ENSG00000175274	TP53I11	0.00103195	1.53696
					ENSG00000175279	CENPS	0.000853365	1.18965
					ENSG00000175287	PHYHD1	0.00393829	2.34029
					ENSG00000175305	CCNE2	0.0262336	-1.58889
					ENSG00000175315	CST6	0.00168095	1.37781
					ENSG00000175538	KCNE3	0.00604957	2.27544
					ENSG00000175550	DRAP1	0.00181961	1.01798
					ENSG00000175564	UCP3	0.0363287	1.07093
					ENSG00000175567	UCP2	0.00135648	1.2009
					ENSG00000175602	CCDC85B	4.97581e-05	2.71238
					ENSG00000175664	TEX26	6.60252e-06	3.6219
					ENSG00000175697	GPR156	0.0404437	-1.51918
					ENSG00000175701	MTLN	0.000124072	2.64439
					ENSG00000175727	MLXIP	0.0080747	1.40046
					ENSG00000175756	AURKAIP1	0.000455099	1.48771
					ENSG00000175787	ZNF169	0.0255212	-1.14312
					ENSG00000175793	SFN	0.00218377	1.04966
					ENSG00000175866	BAIAP2	0.00140903	1.10145
					ENSG00000175877	TMEM270	0.00135492	2.11602
					ENSG00000176018	LYSMD3	0.000342861	-1.07888
					ENSG00000176029	C11orf16	5.14191e-07	3.10562
					ENSG00000176046	NUPR1	1.79052e-10	3.21854
					ENSG00000176058	TPRN	0.000635258	1.03897
					ENSG00000176153	GPX2	0.00303306	2.43718
					ENSG00000176222	ZNF404	0.00918558	1.71911
					ENSG00000176340	COX8A	0.000584294	1.42701
					ENSG00000176381	PRR18	0.0004878	3.1994
					ENSG00000176472	ZNF575	0.0333902	-1.05603
					ENSG00000176563	CNTD1	0.0165674	1.80832
					ENSG00000176601	MAP3K19	0.00168563	2.59857
					ENSG00000176700	SCAND2P	0.00654077	2.18703
					ENSG00000176731	RBIS	0.000823344	1.25135
					ENSG00000176749	CDK5R1	0.00545582	-1.41511
					ENSG00000176842	IRX5	1.68126e-05	4.32662
					ENSG00000176845	METRNL	0.000927166	1.21465
					ENSG00000176912	TYMSOS	0.0032306	1.77592
					ENSG00000176933	TOB2P1	0.0313301	1.69319
					ENSG00000176953	NFATC2IP	0.0185653	1.0713
					ENSG00000176994	SMCR8	0.00257641	-1.07608
					ENSG00000176998	HCG4	0.00353384	-1.18056
					ENSG00000177045	SIX5	0.0287053	-1.19617
					ENSG00000177076	ACER2	0.0027489	-1.48426
					ENSG00000177119	ANO6	0.00252539	-1.25884
					ENSG00000177125	ZBTB34	0.000344649	-1.21198
					ENSG00000177283	FZD8	0.00374776	1.91672
					ENSG00000177409	SAMD9L	0.000120216	-1.42844
					ENSG00000177410	ZFAS1	0.00119293	1.43808
					ENSG00000177425	PAWR	0.020167	1.25032
					ENSG00000177463	NR2C2	0.00798311	-1.45153
					ENSG00000177508	IRX3	1.44874e-09	2.87134
					ENSG00000177556	ATOX1	0.000515471	1.71634
					ENSG00000177570	SAMD12	0.00416654	-1.29026
					ENSG00000177600	RPLP2	9.64444e-05	2.1003
					ENSG00000177602	HASPIN	0.0378068	-1.06694
					ENSG00000177679	SRRM3	0.00144207	1.8303
					ENSG00000177700	POLR2L	0.000172251	2.01843
					ENSG00000177954	RPS27	0.000602177	1.34443
					ENSG00000177971	IMP3	0.00111967	1.17321
					ENSG00000177981	ASB8	0.00367346	1.57728
					ENSG00000177989	CIMAP1B	0.000308973	1.58411
					ENSG00000178053	MLF1	0.00140543	1.45077
					ENSG00000178074	C2orf69	0.0302236	1.12198
					ENSG00000178078	STAP2	0.00117486	1.13247
					ENSG00000178125	PPP1R42	0.000823344	3.05525
					ENSG00000178127	NDUFV2	0.00219875	1.8455
					ENSG00000178150	ZNF114	0.01009	1.05919
					ENSG00000178372	CALML5	0.000917117	2.99575
					ENSG00000178401	DNAJC22	0.00769186	1.35565
					ENSG00000178449	COX14	0.00140903	1.25034
					ENSG00000178502	KLHL11	0.00687977	-2.02988
					ENSG00000178531	CTXN1	1.27657e-05	1.74068
					ENSG00000178660	ARMC10P1	0.0288296	-4.00109
					ENSG00000178741	COX5A	0.00121624	1.16947
					ENSG00000178878	APOLD1	0.0479162	1.05338
					ENSG00000178896	EXOSC4	0.00030818	1.90046
					ENSG00000178934	LGALS7B	0.000256055	3.36522
					ENSG00000178951	ZBTB7A	0.00247597	1.82837
					ENSG00000178965	ERICH3	5.5578e-07	2.83871
					ENSG00000178982	EIF3K	0.00114931	1.12896
					ENSG00000179046	TRIML2	0.00701549	1.28084
					ENSG00000179085	DPM3	9.71111e-05	2.53284
					ENSG00000179111	HES7	0.000405115	1.07178
					ENSG00000179133	C10orf67	0.0124118	2.35519
					ENSG00000179271	GADD45GIP1	4.56672e-05	2.16199
					ENSG00000179295	PTPN11	0.000704292	-1.16468
					ENSG00000179743	SPEN-AS1	0.0183618	1.18991
					ENSG00000179813	FAM216B	3.29182e-06	2.57263
					ENSG00000179820	MYADM	0.00195653	1.61768
					ENSG00000179862	CITED4	0.00156157	1.35081
					ENSG00000179869	ABCA13	4.66774e-05	2.45756
					ENSG00000179899	PHC1P1	0.00206403	-2.70113
					ENSG00000179902	CFAP276	2.81946e-09	3.26525
					ENSG00000179941	BBS10	0.0243716	-1.08611
					ENSG00000179965	ZNF771	0.000661747	1.59088
					ENSG00000179967	PPP1R14BP3	0.0175289	1.25108
					ENSG00000179978	NAIPP2	0.0358876	-2.34565
					ENSG00000180015		0.00930666	-2.79069
					ENSG00000180071	ANKRD18A	0.00569219	1.58931
					ENSG00000180096	SEPTIN1	0.0476937	1.42269
					ENSG00000180185	FAHD1	0.001221	1.82143
					ENSG00000180229	HERC2P3	0.0179998	-1.75423
					ENSG00000180257	ZNF816	0.000500231	-1.14463
					ENSG00000180336	MEIOC	0.0168679	-1.21937
					ENSG00000180353	HCLS1	0.00161309	2.34414
					ENSG00000180385	EMC3-AS1	0.00134332	2.18374
					ENSG00000180423	HARBI1	0.0166045	1.47875
					ENSG00000180574	EIF2S3B	0.00755961	-2.04889
					ENSG00000180581	SRP9P1	0.0473008	-1.59192
					ENSG00000180747	SMG1P3	0.0128674	-1.52664
					ENSG00000180787	ZFP3	0.00528684	3.03671
					ENSG00000180806	HOXC9	0.00374889	1.44439
					ENSG00000180879	SSR4	0.000948501	1.28318
					ENSG00000180953	ST20	0.000732297	2.24471
					ENSG00000181085	MAPK15	1.38516e-08	3.16884
					ENSG00000181104	F2R	0.00493079	1.57448
					ENSG00000181123	LOC107985579	1.82475e-05	3.4072
					ENSG00000181284	TMEM102	0.000138665	1.69858
					ENSG00000181315	ZNF322	0.000199987	-1.22527
					ENSG00000181322	NME9	8.95217e-05	3.37705
					ENSG00000181378	CFAP65	8.23699e-06	2.69026
					ENSG00000181392	SYNE4	0.00591863	1.74062
					ENSG00000181404	WASHC1	0.00417731	1.12088
					ENSG00000181449	SOX2	8.72543e-07	2.9333
					ENSG00000181544	FANCB	0.0103691	-1.18407
					ENSG00000181577	LINC03040	0.0235682	2.46782
					ENSG00000181722	ZBTB20	6.30967e-05	3.40865
					ENSG00000181826	RELL1	0.00448053	-1.95593
					ENSG00000181827	RFX7	0.00706221	-1.08472
					ENSG00000182004	SNRPE	0.0012323	1.4506
					ENSG00000182117	NOP10	0.000619691	1.31991
					ENSG00000182150	ERCC6L2	0.00242131	-1.24087
					ENSG00000182154	MRPL41	0.000329025	1.66582
					ENSG00000182175	RGMA	0.0252627	1.85693
					ENSG00000182177	ASB18	0.00866895	1.73991
					ENSG00000182196	ARL6IP4	0.0234957	1.06347
					ENSG00000182224	CYB5D1	0.0244962	-1.35127
					ENSG00000182324	KCNJ14	0.000445577	2.99184
					ENSG00000182329	KIAA2012	0.00706917	3.34605
					ENSG00000182463	TSHZ2	5.69585e-05	3.5214
					ENSG00000182544	SLC61A1	0.00499328	1.02436
					ENSG00000182557	SPNS3	0.00298153	1.96945
					ENSG00000182568	SATB1	0.00066642	2.62001
					ENSG00000182600	SNORC	0.0230322	1.3698
					ENSG00000182687	GALR2	0.00500784	1.73085
					ENSG00000182759	MAFA	0.0292309	2.36147
					ENSG00000182774	RPS17	0.00165738	1.26238
					ENSG00000182809	CRIP2	0.000120216	1.60349
					ENSG00000182841	RRP7BP	0.0338966	1.1154
					ENSG00000182853	VMO1	2.42546e-06	2.9581
					ENSG00000182873	PRKCZ-AS1	0.00110164	-1.96601
					ENSG00000182890	GLUD2	0.0428137	-1.41768
					ENSG00000182899	RPL35A	0.000595059	1.49234
					ENSG00000182902	SLC25A18	0.00208726	2.51128
					ENSG00000183011	NAA38	0.000196418	1.99776
					ENSG00000183048	SLC25A10	0.0029087	1.1703
					ENSG00000183049	CAMK1D	0.00221535	2.11399
					ENSG00000183072	NKX2-5	0.0211285	1.12791
					ENSG00000183092	BEGAIN	0.0160369	-1.25959
					ENSG00000183145	RIPPLY3	0.000116903	3.14788
					ENSG00000183172	SMDT1	0.00142253	1.05078
					ENSG00000183208	GDPGP1	0.0114909	1.077
					ENSG00000183273	CCDC60	1.0184e-05	3.32456
					ENSG00000183346	CABCOCO1	2.07866e-07	4.09369
					ENSG00000183354	BRD10	0.00850412	1.6625
					ENSG00000183401	CCDC159	0.0340573	1.09545
					ENSG00000183458	PKD1P3	0.00849243	-1.79572
					ENSG00000183476	SH2D7	0.0128003	-2.6701
					ENSG00000183605	SFXN4	0.00136877	1.35023
					ENSG00000183615	FAM167B	0.018526	1.40423
					ENSG00000183617	MRPL54	0.000231757	1.89296
					ENSG00000183644	HOATZ	5.38818e-06	3.90221
					ENSG00000183648	NDUFB1	0.000147368	2.22579
					ENSG00000183684	ALYREF	0.00083701	1.19928
					ENSG00000183690	EFHC2	2.37076e-05	3.06964
					ENSG00000183770	FOXL2	0.0310398	1.03911
					ENSG00000183775	KCTD16	0.0318421	3.29832
					ENSG00000183808	RBM12B	0.00048638	-1.21471
					ENSG00000183822	NCF4-AS1	0.0432453	-2.00644
					ENSG00000183828	NUDT14	0.000201858	1.79062
					ENSG00000183831	ANKRD45	0.0164447	2.36391
					ENSG00000183833	CFAP91	0.020524	1.48865
					ENSG00000183844	FAM3B	0.0488287	1.01249
					ENSG00000183853	KIRREL1	0.00427847	-1.14213
					ENSG00000183856	IQGAP3	0.0175336	-1.23832
					ENSG00000183914	DNAH2	9.12395e-06	2.56577
					ENSG00000183943	PRKX	0.00650267	1.35773
					ENSG00000183971	NPW	0.00161624	2.5756
					ENSG00000184012	TMPRSS2	0.000170708	2.6827
					ENSG00000184076	UQCR10	0.000960999	1.0336
					ENSG00000184154	LRRC51	0.00544854	1.12015
					ENSG00000184220	CMSS1	0.00242575	1.37297
					ENSG00000184281	TSSC4	0.0010488	1.48377
					ENSG00000184307	ZDHHC23	0.00447326	-1.33932
					ENSG00000184357	H1-5	0.000827979	3.41578
					ENSG00000184384	MAML2	0.00244131	-1.0322
					ENSG00000184385	UMODL1-AS1	0.00113881	3.16521
					ENSG00000184454	NCMAP	0.00688795	1.4892
					ENSG00000184588	PDE4B	0.00650763	-2.54168
					ENSG00000184675	AMER1	0.0230285	-1.26352
					ENSG00000184678	H2BC21	0.00773118	1.13199
					ENSG00000184709	LRRC26	0.00421681	1.50687
					ENSG00000184787	UBE2G2	0.0126287	1.29437
					ENSG00000184828	ZBTB7C	0.00330075	2.43156
					ENSG00000184949	FAM227A	0.00537727	1.9973
					ENSG00000184986	TMEM121	2.77283e-05	1.77412
					ENSG00000184990	SIVA1	0.000476178	1.49037
					ENSG00000184992	BRI3BP	0.00343634	1.69533
					ENSG00000185055	EFCAB10	0.016753	1.62844
					ENSG00000185129	PURA	0.0132544	1.28041
					ENSG00000185164	NOMO2	0.038134	-1.53478
					ENSG00000185222	TCEAL9	0.00648431	1.38436
					ENSG00000185245	GP1BA	0.0329391	-2.27641
					ENSG00000185250	PPIL6	6.51579e-07	2.29442
					ENSG00000185275	CD24P4	0.0049379	-1.98805
					ENSG00000185291	IL3RA	0.00195184	2.62329
					ENSG00000185332	TMEM105	1.67385e-05	2.85453
					ENSG00000185347	TEDC1	0.000715708	1.36127
					ENSG00000185361	TNFAIP8L1	0.000681528	1.66962
					ENSG00000185386	MAPK11	0.000296698	1.38823
					ENSG00000185432	TMT1A	1.16742e-09	3.40267
					ENSG00000185475	TMEM179B	0.000895461	1.03428
					ENSG00000185479	KRT6B	0.0147174	1.75313
					ENSG00000185499	MUC1	0.000491642	1.50367
					ENSG00000185561	TLCD2	0.0134762	1.25705
					ENSG00000185567	AHNAK2	0.0340573	-1.27198
					ENSG00000185614	INKA1	0.0356883	2.45322
					ENSG00000185650	ZFP36L1	0.0175336	1.0843
					ENSG00000185681	MORN5	1.97986e-09	3.8894
					ENSG00000185697	MYBL1	0.00592205	-1.03539
					ENSG00000185722	ANKFY1	0.00682662	-1.27509
					ENSG00000185860	CCDC190	0.000451192	2.5742
					ENSG00000185909	KLHDC8B	0.000533651	3.37392
					ENSG00000185950	IRS2	0.00443829	1.79806
					ENSG00000186010	NDUFA13	6.40114e-05	2.79618
					ENSG00000186063	AIDA	0.00606212	-1.2183
					ENSG00000186174	BCL9L	0.0246049	-1.31825
					ENSG00000186260	MRTFB	0.00299211	-1.3952
					ENSG00000186329	TMEM212	0.0012728	3.57863
					ENSG00000186376	ZNF75D	0.00294474	-1.13642
					ENSG00000186468	RPS23	0.00188144	1.00828
					ENSG00000186471	AKAP14	9.29631e-07	3.05758
					ENSG00000186493	IRX2-DT	0.000204873	2.19554
					ENSG00000186526	CYP4F8	0.00800765	1.14388
					ENSG00000186529	CYP4F3	0.0295195	1.30079
					ENSG00000186615	KTN1-AS1	0.0416539	1.66486
					ENSG00000186638	KIF24	0.00295991	-1.00092
					ENSG00000186654	PRR5	0.00318562	1.22322
					ENSG00000186684	CYP27C1	0.0260545	1.19828
					ENSG00000186687	LYRM7	0.0301283	1.12851
					ENSG00000186710	CFAP73	1.23608e-08	2.94859
					ENSG00000186715	MST1L	0.0391236	1.33825
					ENSG00000186832	KRT16	0.000450147	1.01512
[truncated: 1,142 more rows]

## Sheet: E3 16HBE IPA
Table E3. IPA analysis of 16HBE cells exposed to ∆8-THCQ (8.5 µM).
	12 hours				24 hours
	Name	z-score	p-value		Name	z-score	p-value
Canonical Pathways	Signaling by Retinoic Acid	2.64575	8.31764e-06		Response of EIF2AK4 (GCN2) to amino acid deficiency	7.54983	1.25893e-31
	Phase I - Functionalization of compounds	3	1.47911e-05		Nonsense-Mediated Decay (NMD)	7.48777	1e-30
	Bile acid and bile salt metabolism	2.23607	0.000758578		Eukaryotic Translation Elongation	7.61577	1.58489e-27
	Serotonin Degradation	2	0.000870964		Eukaryotic Translation Termination	7.61577	1.58489e-27
	Neutrophil degranulation	3.87298	0.0109648		Eukaryotic Translation Initiation	7.93725	5.01187e-26
	Chondroitin Sulfate Biosynthesis (Late Stages)	2	0.0186209		SRP-dependent cotranslational protein targeting to membrane	7.74597	5.01187e-25
	Costimulation by the CD28 family	2.44949	0.0194984		Selenoamino acid metabolism	7.74597	3.16228e-24
	Pathogen Induced Cytokine Storm Signaling Pathway	3.16228	0.0218776		Major pathway of rRNA processing in the nucleolus and cytosol	7.94101	5.01187e-23
	Chondroitin Sulfate Biosynthesis	2	0.0275423		Coronavirus Replication Pathway	1.34164	1.99526e-22
	Xenobiotic Metabolism CAR Signaling Pathway	2.23607	0.0354813		Oxidative Phosphorylation	6.63325	2.51189e-22
Upstream Regulators	NEDD9	-2.01	1.37e-08		torin1	-5.818	8.89e-32
	FOXA2	2.528	5.91e-08		RICTOR	-8.126	1.05e-28
	CHS-828	-2.219	1.06e-07		SPEN	5.377	6.56e-25
	CEP20	-2.449	2.15e-07		LARP1	-6.704	1.56e-24
	FOXA1	-1.023	5.02e-07		YAP1	0.115	2.1e-23
	ULK4	-2.449	6.05e-07		3,5-dihydroxyphenylglycine	6.945	1.35e-21
	IL13	2.005	6.29e-07		CAB39L	5.292	1.94e-21
	TP63	-0.97	6.46e-07		MLXIPL	6.577	3.4e-21
	CBX5	-3.317	1.02e-06		TLE3	-1.89	2.74e-19
	IL4	4.406	1.25e-06		CTNNB1	2.11	1.95e-17
Tox Lists	Xenobiotic Metabolism Signaling	NA	2.34423e-06		Mitochondrial Dysfunction	NA	1.58489e-13
	Fatty Acid Metabolism		0.000112202		Glutathione Depletion - Phase II Reactions		0.00169824
	CAR/RXR Activation		0.00114815		Renal Proximal Tubule Toxicity Biomarker Panel (Rat)		0.00269153
	LPS/IL-1 Mediated Inhibition of RXR Function		0.00144544		Aryl Hydrocarbon Receptor Signaling		0.00436516
	Hepatic Fibrosis		0.00363078		Decreases Depolarization of Mitochondria and Mitochondrial Membrane		0.00933254
	TR/RXR Activation		0.060256		Cytochrome P450 Panel - Substrate is a Fatty Acid (Human)		0.0104713
	Renal Proximal Tubule Toxicity Biomarker Panel (Rat)		0.0691831		Genes associated with Chronic Allograft Nephropathy (Human)		0.0112202
	Renal Safety Biomarker Panel (PSTC)		0.0933254		Oxidative Stress		0.0165959
	FXR/RXR Activation		0.0977237		Cytochrome P450 Panel - Substrate is an Eicosanoid (Human)		0.0218776
	Hormone Receptor Regulated Cholesterol Metabolism		0.121619		Long-term Renal Injury Anti-oxidative Response Panel (Rat)		0.0229087
Diseases and Biological Functions	primary ciliary dyskinesia		1.74e-35		Nonhematologic malignant neoplasm	0.02	1.23e-137
	nonhematologic malignant neoplasm	-0.59	1.35e-34		Non-hematological solid tumor	-0.351	3.19e-136
	non-hematological solid tumor	-0.426	3.16e-34		Solid tumor	1.557	3.04e-132
	extracranial solid tumor	-0.685	8.18e-34		Malignant solid tumor	-0.508	6.53e-132
	malignant solid tumor	-1.283	2.08e-33		Non-melanoma solid tumor	-0.976	1.96e-131
	solid tumor	0.003	5.62e-33		Cancer	0.739	5.16e-130
	non-central nervous system malignant neoplasm	-0.996	1.35e-32		Extracranial solid tumor	0.348	4.98e-129
	extrapancreatic malignant tumor	-0.28	2.22e-32		Carcinoma	-0.448	7.26e-128
	non-melanoma solid tumor	-1.373	2.26e-32		Tumorigenesis of tissue	-0.66	7.5e-128
	carcinoma	-1.242	1.15e-30		Epithelial neoplasm	-0.484	4.49e-127
Ingenuity pathway analysis (IPA) was performed on genes signficantly altered (p-value < 0.05, log2FC ≥ 1) by ∆8-THCQ (8.5 µM) compared to the vehicle control at 12 and 24 hours. The top 10 canonical pathways, tox lists, upstream regualtors, and diseases and biological functions sorted by p-value are shown. Canonical pathways and upstream regulators with non-zero z-scores were included.

## Sheet: E4 16HBE GSEA
Table E4. GSEA analysis of 16HBEs exposed to ∆8-THCQ (8.5 µM) for 12 hours.
	∆8-THCQ vs. VC
	Gene Set	NES	FDR q-value
Hallmarks	KRAS Signaling Up	1.69202	0.0419953
	KRAS Signaling Down	1.6762	0.0368287
	Xenobiotic Metabolism	1.57447	0.0723957
	Hedgehog Signaling	-1.48619	0.0625665
	Androgen Response	-1.48916	0.0726355
	Interferon Alpha Response	-1.60073	0.0321158
	G2M Checkpoint	-1.61556	0.0278197
	Protein Secretion	-1.78015	0.0108675
	UV Response Down	-1.94331	0.00430598
	Mitotic Spindle	-3.04127	0
GO	Axoneme	3.12582	0
	Microtubule Bundle Formation	2.98545	0
	Cilium Movement	2.98402	0
	Abnormal Sperm Motility	2.97573	0
	Axoneme Assembly	2.97088	0
	Motile Cilium	2.92354	0
	Productive Cough	2.90004	0
	Abnormal Atrial Arrangement	2.87991	0
	Nasal Congestion	2.87322	0
	Chronic Sinusitis	2.84281	0
WikiPathways	Cytoplasmic Ribosomal Proteins	2.38649	0
	Vitamin A and Carotenoid Metabolism	2.23583	0
	Glioblastoma Signaling Pathways	-2.71671	0
	TYROBP Casual Network in Microglia	2.13016	0.00029
	Ciliopathies	2.1316	0.000387
	Metapathway Biotransformation Phase I and II	2.09494	0.000687
	Hippo-YAP Signaling	-2.37229	0.000876
	Adenoid Cystic Carcinoma	-2.52851	0.00131383
	Cholesterol Biosynthesis Pathway	-2.23755	0.00236633
	Electron Transport Chain in Mitochondria	2.04289	0.00268154
Gene Set Enrichment Analysis (GSEA) was performed on genes signficantly altered (p-value < 0.05, log2FC ≥ 1) by ∆8-THCQ (8.5 µM) compared to the vehicle control at 12 hours. The top 10 gene sets in the Hallmarks, GO, and WikiPathways collections sorted by FDR q-value are shown.

## Sheet: E4 HBEC Genes
Table E4. Genes significantly altered in HBECs exposed to vaped ∆8-THC analyzed by product type.
Distillates and Disposables vs. PG/VG Control					Juices vs. PG/VG Control					Distillates and Disposables vs. Juices
Probe	Symbol	padj	logFoldChange		Probe	Symbol	padj	logFoldChange		Probe	Symbol	padj	logFoldChange
ENSG00000170345	FOS	1.98755e-41	5.68548		ENSG00000176890	TYMS	1.10145e-12	1.35665		ENSG00000170345	FOS	1.23775e-46	5.3134
ENSG00000120129	DUSP1	1.00599e-40	4.19876		ENSG00000122952	ZWINT	1.10145e-12	1.01771		ENSG00000120129	DUSP1	4.13635e-46	4.09386
ENSG00000177606	JUN	2.55428e-37	3.80577		ENSG00000276043	UHRF1	4.85723e-12	1.40302		ENSG00000177606	JUN	1.36048e-42	3.6683
ENSG00000128016	ZFP36	1.68659e-35	4.00815		ENSG00000105011	ASF1B	5.72486e-12	1.41363		ENSG00000128016	ZFP36	3.01898e-41	3.943
ENSG00000137331	IER3	7.61564e-35	4.30507		ENSG00000171848	RRM2	5.0322e-11	1.89488		ENSG00000137331	IER3	2.27536e-38	3.74077
ENSG00000123358	NR4A1	9.28158e-33	6.14529		ENSG00000167779	IGFBP6	5.49822e-11	1.51301		ENSG00000123358	NR4A1	3.80716e-38	5.46005
ENSG00000120738	EGR1	3.79868e-32	3.88967		ENSG00000089685	BIRC5	8.06726e-10	1.96991		ENSG00000158050	DUSP2	6.78453e-38	4.6669
ENSG00000159388	BTG2	1.79575e-30	2.85441		ENSG00000094804	CDC6	8.06726e-10	1.45643		ENSG00000275993	LOC102724428	6.41832e-36	3.40282
ENSG00000160888	IER2	1.79575e-30	3.23079		ENSG00000131153	GINS2	1.0809e-09	1.55798		ENSG00000159388	BTG2	9.2967e-36	2.76824
ENSG00000158050	DUSP2	1.79575e-30	5.33292		ENSG00000129195	PIMREG	7.94091e-10	2.30647		ENSG00000160888	IER2	1.26991e-35	3.08784
ENSG00000138166	DUSP5	5.54146e-29	4.54229		ENSG00000142945	KIF2C	1.44183e-09	1.55767		ENSG00000128342	LIF	1.01596e-34	3.55792
ENSG00000275993	LOC102724428	5.54146e-29	3.53704		ENSG00000101057	MYBL2	1.65043e-09	1.81789		ENSG00000138166	DUSP5	1.01596e-34	3.97714
ENSG00000128342	LIF	9.33525e-29	4.12325		ENSG00000138180	CEP55	1.80194e-09	2.32313		ENSG00000120738	EGR1	2.28012e-34	3.30589
ENSG00000171223	JUNB	2.40575e-28	3.23996		ENSG00000145386	CCNA2	3.92585e-09	1.99357		ENSG00000067082	KLF6	2.60734e-34	2.22053
ENSG00000067082	KLF6	2.68613e-28	2.21528		ENSG00000101412	E2F1	4.12087e-09	1.37001		ENSG00000125740	FOSB	2.60734e-34	5.80884
ENSG00000134107	BHLHE40	8.57338e-27	2.2956		ENSG00000167900	TK1	5.1166e-09	1.11703		ENSG00000171223	JUNB	4.55759e-33	3.09683
ENSG00000125740	FOSB	1.03326e-26	6.06039		ENSG00000168907	PLA2G4F	6.97106e-09	1.40156		ENSG00000134107	BHLHE40	1.55834e-31	2.19571
ENSG00000185022	MAFF	1.65591e-26	3.1164		ENSG00000169607	CKAP2L	6.93951e-09	1.5752		ENSG00000185022	MAFF	4.81852e-31	2.83052
ENSG00000148339	SLC25A25	5.50441e-26	1.73035		ENSG00000127564	PKMYT1	6.93951e-09	1.96561		ENSG00000148339	SLC25A25	5.29242e-31	1.63995
ENSG00000087074	PPP1R15A	5.83809e-24	1.41735		ENSG00000198826	ARHGAP11A	9.49016e-09	1.10343		ENSG00000108551	RASD1	5.29242e-31	5.63477
ENSG00000119986	AVPI1	6.10998e-24	2.36282		ENSG00000137804	NUSAP1	1.13156e-08	1.76903		ENSG00000119986	AVPI1	2.48686e-29	2.23516
ENSG00000125968	ID1	3.4222e-23	2.29008		ENSG00000168078	PBK	1.05922e-08	1.96462		ENSG00000142178	SIK1	1.73952e-28	3.28891
ENSG00000144655	CSRNP1	7.77261e-23	2.35006		ENSG00000146670	CDCA5	2.2387e-08	1.21535		ENSG00000109321	AREG	5.4864e-28	3.42402
ENSG00000140450	ARRDC4	1.10488e-22	-1.38583		ENSG00000175832	ETV4	3.16204e-08	1.49283		ENSG00000144655	CSRNP1	7.83849e-28	2.18248
ENSG00000139318	DUSP6	7.47064e-22	2.6157		ENSG00000109805	NCAPG	3.60527e-08	1.83725		ENSG00000251562	MALAT1	2.49073e-27	3.30468
ENSG00000108551	RASD1	4.48701e-22	5.84764		ENSG00000093009	CDC45	3.94503e-08	1.5529		ENSG00000153234	NR4A2	5.7217e-27	2.10291
ENSG00000185950	IRS2	3.4246e-21	1.673		ENSG00000088325	TPX2	4.8652e-08	1.17572		ENSG00000087074	PPP1R15A	5.98745e-27	1.25133
ENSG00000142178	SIK1	3.4246e-21	3.45306		ENSG00000068489	PRR11	4.8652e-08	1.66167		ENSG00000116285	ERRFI1	1.92152e-26	2.04435
ENSG00000210135	NA	9.12099e-21	-1.75041		ENSG00000080986	NDC80	4.8652e-08	1.95823		ENSG00000125968	ID1	5.19806e-26	1.96419
ENSG00000117525	F3	1.16614e-20	1.45711		ENSG00000237649	KIFC1	7.55267e-08	1.42808		ENSG00000099860	GADD45B	1.30863e-25	2.47487
ENSG00000114315	HES1	1.22586e-20	2.57067		ENSG00000123485	HJURP	8.64902e-08	1.92019		ENSG00000163660	CCNL1	1.90317e-25	1.80298
ENSG00000116285	ERRFI1	1.28157e-20	2.04319		ENSG00000111206	FOXM1	1.27759e-07	1.45982		ENSG00000175592	FOSL1	2.59622e-25	3.74357
ENSG00000136826	KLF4	1.30577e-20	1.55713		ENSG00000131747	TOP2A	2.17336e-07	1.44704		ENSG00000114315	HES1	2.66937e-25	2.4336
ENSG00000109321	AREG	1.22586e-20	3.98109		ENSG00000101003	GINS1	2.71524e-07	1.09809		ENSG00000185950	IRS2	3.006e-25	1.52246
ENSG00000143878	RHOB	2.49081e-20	1.92874		ENSG00000151468	CCDC3	5.10845e-07	1.01525		ENSG00000143878	RHOB	3.82458e-25	1.87757
ENSG00000148841	ITPRIP	4.12646e-20	2.01262		ENSG00000165244	ZNF367	5.30189e-07	1.83149		ENSG00000136826	KLF4	7.14671e-25	1.44734
ENSG00000153234	NR4A2	4.15021e-20	1.98566		ENSG00000156970	BUB1B	7.2055e-07	1.32946		ENSG00000184557	SOCS3	7.26715e-25	3.83956
ENSG00000210140	NA	4.22378e-20	-1.70777		ENSG00000121152	NCAPH	9.12804e-07	1.06129		ENSG00000210135	NA	1.54165e-24	-1.6406
ENSG00000163659	TIPARP	6.7137e-20	1.53536		ENSG00000189057	FAM111B	9.28808e-07	1.61545		ENSG00000238279	NA	1.10956e-24	3.87006
ENSG00000099860	GADD45B	9.76146e-20	2.48493		ENSG00000111665	CDCA3	1.06334e-06	1.36314		ENSG00000113070	HBEGF	4.14403e-24	3.14348
ENSG00000184557	SOCS3	1.81218e-19	4.11983		ENSG00000143476	DTL	1.13618e-06	1.83892		ENSG00000139318	DUSP6	4.21873e-24	1.85545
ENSG00000251562	MALAT1	1.81333e-19	2.90182		ENSG00000175063	UBE2C	1.39204e-06	1.62663		ENSG00000173846	PLK3	4.3525e-24	1.78742
ENSG00000131746	TNS4	3.95162e-19	1.74495		ENSG00000113361	CDH6	1.12668e-06	-1.0802		ENSG00000162772	ATF3	4.63659e-24	2.46817
ENSG00000130513	GDF15	4.80407e-19	3.80062		ENSG00000134690	CDCA8	1.75395e-06	1.23588		ENSG00000025708	TYMP	4.64885e-24	1.36852
ENSG00000113070	HBEGF	6.67627e-19	3.80606		ENSG00000095970	TREM2	1.88811e-06	1.8266		ENSG00000122877	EGR2	5.47505e-24	3.56842
ENSG00000136997	MYC	6.67627e-19	1.71178		ENSG00000148773	MKI67	2.41539e-06	2.17896		ENSG00000148841	ITPRIP	7.8878e-24	1.69626
ENSG00000109084	TMEM97	6.7679e-19	-1.36912		ENSG00000198901	PRC1	2.43926e-06	1.05394		ENSG00000210140	NA	8.86713e-24	-1.62504
ENSG00000163660	CCNL1	6.82535e-19	1.71118		ENSG00000144354	CDCA7	3.05162e-06	1.29784		ENSG00000249007	NA	6.5537e-24	3.45232
ENSG00000210191	NA	6.82535e-19	-2.4594		ENSG00000163808	KIF15	3.05162e-06	1.46829		ENSG00000163659	TIPARP	1.56514e-23	1.38334
ENSG00000025708	TYMP	1.01619e-18	1.36447		ENSG00000178999	AURKB	3.2428e-06	2.15454		ENSG00000185650	ZFP36L1	1.56514e-23	1.10967
ENSG00000149527	PLCH2	1.2523e-18	1.53203		ENSG00000112984	KIF20A	3.70744e-06	1.21526		ENSG00000140450	ARRDC4	1.99292e-23	-1.12499
ENSG00000175592	FOSL1	2.01503e-18	4.07142		ENSG00000090889	KIF4A	4.36488e-06	1.00334		ENSG00000117616	RSRP1	5.52957e-23	1.82408
ENSG00000162772	ATF3	5.56637e-18	2.38106		ENSG00000145934	TENM2	4.36488e-06	1.02476		ENSG00000245532	NEAT1	7.02839e-23	2.41702
ENSG00000128422	KRT17	1.0079e-17	1.48866		ENSG00000166803	PCLAF	6.60201e-06	1.36576		ENSG00000179388	EGR3	1.23269e-22	2.85372
ENSG00000142627	EPHA2	1.14914e-17	1.52638		ENSG00000112182	BACH2	8.92127e-06	-1.45127		ENSG00000130513	GDF15	1.69707e-22	3.37092
ENSG00000144802	NFKBIZ	1.59477e-17	1.90456		ENSG00000066279	ASPM	1.40383e-05	1.95697		ENSG00000081041	CXCL2	2.01665e-22	3.63584
ENSG00000265972	TXNIP	1.83656e-17	-1.24791		ENSG00000100526	CDKN3	1.56864e-05	1.71004		ENSG00000268812	LIF-AS2	1.16843e-22	3.3086
ENSG00000112715	VEGFA	2.26386e-17	2.54714		ENSG00000184163	C1QTNF12	2.67635e-05	1.54773		ENSG00000149927	DOC2A	2.54403e-22	1.69267
ENSG00000185650	ZFP36L1	2.26386e-17	1.05201		ENSG00000134222	PSRC1	3.24939e-05	1.13941		ENSG00000171163	ZNF692	3.94958e-22	1.66973
ENSG00000186832	KRT16	3.75841e-17	2.5259		ENSG00000168481	LGI3	4.93549e-05	1.28066		ENSG00000180739	S1PR5	3.94958e-22	-1.44855
ENSG00000118503	TNFAIP3	3.75841e-17	1.37946		ENSG00000051180	RAD51	5.7768e-05	1.24731		ENSG00000136997	MYC	4.54148e-22	1.50594
ENSG00000179388	EGR3	4.43194e-17	3.51046		ENSG00000075218	GTSE1	5.96038e-05	1.48175		ENSG00000131746	TNS4	9.05328e-22	1.48408
ENSG00000177426	TGIF1	5.35787e-17	1.0102		ENSG00000179593	ALOX15B	0.00010404	1.03705		ENSG00000265972	TXNIP	9.8943e-22	-1.18697
ENSG00000171163	ZNF692	6.93477e-17	1.74877		ENSG00000244405	ETV5	0.000125504	1.21143		ENSG00000204618	RNF39	1.21194e-21	2.54669
ENSG00000095397	WHRN	9.7715e-17	1.06028		ENSG00000135451	TROAP	0.000258698	1.60387		ENSG00000104936	DMPK	1.46794e-21	1.3652
ENSG00000238279	NA	3.87127e-17	4.2856		ENSG00000143228	NUF2	0.000305898	1.00478		ENSG00000267519	NA	1.71506e-21	3.04437
ENSG00000198888	ND1	1.40974e-16	-1.18314		ENSG00000109511	ANXA10	0.000278772	2.52836		ENSG00000225138	NA	1.7733e-21	1.8758
ENSG00000164877	MICALL2	1.57517e-16	1.30951		ENSG00000138778	CENPE	0.000646863	1.3199		ENSG00000114270	COL7A1	1.8853e-21	2.2993
ENSG00000169429	CXCL8	1.5736e-16	2.90949		ENSG00000183856	IQGAP3	0.000825431	1.97269		ENSG00000128422	KRT17	2.22579e-21	1.38974
ENSG00000249007	NA	1.20172e-16	3.59828		ENSG00000177494	ZBED2	0.00142613	1.16934		ENSG00000140398	NEIL1	3.55438e-21	1.5079
ENSG00000198763	ND2	1.71653e-16	-1.15181		ENSG00000181790	ADGRB1	0.00273433	1.00924		ENSG00000117525	F3	3.37177e-21	1.14008
ENSG00000198840	ND3	1.96695e-16	-1.25918		ENSG00000175305	CCNE2	0.00472477	1.18938		ENSG00000186832	KRT16	3.86076e-21	2.14732
ENSG00000181754	AMIGO1	2.10206e-16	-1.09987		ENSG00000171401	KRT13	0.00257965	1.18496		ENSG00000184465	WDR27	4.7424e-21	1.36317
ENSG00000122877	EGR2	1.9447e-16	3.82393		ENSG00000143631	FLG	0.00499231	1.1416		ENSG00000112715	VEGFA	4.7424e-21	2.31842
ENSG00000117616	RSRP1	2.41386e-16	1.68887		ENSG00000187908	DMBT1	0.0224349	1.0782		ENSG00000144802	NFKBIZ	4.90519e-21	1.6749
ENSG00000173846	PLK3	2.41394e-16	1.57113							ENSG00000007392	LUC7L	5.50216e-21	1.38149
ENSG00000118523	CCN2	2.92953e-16	1.50195							ENSG00000198625	MDM4	6.62578e-21	1.22896
ENSG00000180902	D2HGDH	4.7886e-16	1.20278							ENSG00000118503	TNFAIP3	6.37115e-21	1.26671
ENSG00000075426	FOSL2	4.8492e-16	1.26955							ENSG00000062716	VMP1	6.71076e-21	1.26961
ENSG00000171680	PLEKHG5	7.44292e-16	1.26014							ENSG00000142959	BEST4	9.01398e-21	2.05357
ENSG00000114270	COL7A1	7.52916e-16	2.24134							ENSG00000187905	LRRC74B	9.0529e-21	1.52138
ENSG00000210164	NA	3.2984e-16	-2.48996							ENSG00000198840	ND3	9.09218e-21	-1.2027
ENSG00000167074	TEF	7.62214e-16	-1.06193							ENSG00000214176	NA	9.80093e-21	1.46442
ENSG00000132535	DLG4	9.09797e-16	1.31139							ENSG00000105245	NUMBL	1.0245e-20	1.24392
ENSG00000210176	NA	6.32384e-16	-2.34124							ENSG00000075426	FOSL2	1.00233e-20	1.24864
ENSG00000204618	RNF39	1.21986e-15	2.58549							ENSG00000102878	HSF4	1.22086e-20	2.33408
ENSG00000062716	VMP1	1.10575e-15	1.25426							ENSG00000210191	NA	1.33588e-20	-2.25055
ENSG00000158163	DZIP1L	1.21986e-15	1.06797							ENSG00000158163	DZIP1L	1.66146e-20	1.05862
ENSG00000007392	LUC7L	1.72124e-15	1.36076							ENSG00000257671	KRT7-AS	1.67223e-20	2.43249
ENSG00000081041	CXCL2	1.88043e-15	4.04932							ENSG00000259583	ALDH1A3-AS1	2.15298e-20	2.13189
ENSG00000225138	NA	1.94831e-15	1.74957							ENSG00000184545	DUSP8	2.23178e-20	1.96211
ENSG00000136689	IL1RN	2.05581e-15	2.11352							ENSG00000149527	PLCH2	2.20693e-20	1.24678
ENSG00000141232	TOB1	1.88485e-15	1.04348							ENSG00000204622	NA	3.12037e-20	1.29883
ENSG00000268812	LIF-AS2	7.52916e-16	3.86367							ENSG00000142627	EPHA2	3.22617e-20	1.3316
ENSG00000149927	DOC2A	2.48148e-15	1.53576							ENSG00000141232	TOB1	3.27796e-20	1.03216
ENSG00000074855	ANO8	2.77681e-15	1.36499							ENSG00000004777	ARHGAP33	3.78985e-20	1.74403
ENSG00000210144	NA	2.72175e-15	-1.43924							ENSG00000169660	HEXD	3.78985e-20	1.01851
ENSG00000210196	NA	5.16805e-15	-1.18733							ENSG00000164877	MICALL2	3.78985e-20	1.18977
ENSG00000175606	TMEM70	5.27794e-15	-1.04695							ENSG00000215788	TNFRSF25	4.3071e-20	1.82416
ENSG00000162396	PARS2	6.90904e-15	-1.06735							ENSG00000073756	PTGS2	4.32804e-20	2.79431
ENSG00000104936	DMPK	6.52112e-15	1.24547							ENSG00000184381	PLA2G6	4.32804e-20	1.49346
ENSG00000127528	KLF2	7.52036e-15	2.09666							ENSG00000188747	NOXA1	4.89493e-20	1.45032
ENSG00000184465	WDR27	7.75502e-15	1.27154							ENSG00000142102	PGGHG	4.94273e-20	2.03019
ENSG00000157557	ETS2	7.51336e-15	1.07749							ENSG00000175197	DDIT3	5.24428e-20	2.16167
ENSG00000096060	FKBP5	9.41029e-15	-1.01203							ENSG00000181085	MAPK15	5.31487e-20	1.12537
ENSG00000188747	NOXA1	1.4602e-14	1.45387							ENSG00000267322	SCARNA17	1.66146e-20	2.97254
ENSG00000107968	MAP3K8	1.50437e-14	1.31434							ENSG00000100429	HDAC10	6.92172e-20	1.46681
ENSG00000245532	NEAT1	1.50437e-14	1.98626							ENSG00000160055	TMEM234	6.82761e-20	1.0273
ENSG00000142102	PGGHG	1.7759e-14	1.98666							ENSG00000010310	GIPR	6.74287e-20	1.40615
ENSG00000259583	ALDH1A3-AS1	1.89947e-14	2.14444							ENSG00000240038	AMY2B	7.70948e-20	2.05299
ENSG00000125503	PPP1R12C	1.82371e-14	1.11744							ENSG00000197119	SLC25A29	7.64096e-20	1.00207
ENSG00000127586	CHTF18	3.12893e-14	1.42547							ENSG00000109084	TMEM97	8.86099e-20	-1.14114
ENSG00000267519	NA	3.17865e-14	2.67317							ENSG00000230551	NA	9.7459e-20	1.75594
ENSG00000187961	KLHL17	3.20114e-14	1.49545							ENSG00000254815	LMNTD2-AS1	1.07548e-19	2.11452
ENSG00000214176	NA	3.11574e-14	1.34552							ENSG00000185101	ANO9	1.07548e-19	1.52465
ENSG00000184381	PLA2G6	3.17865e-14	1.41934							ENSG00000168010	ATG16L2	1.23858e-19	1.40382
ENSG00000099194	SCD	3.12893e-14	-1.01931							ENSG00000180902	D2HGDH	1.18039e-19	1.09535
ENSG00000225630	MTND2P28	3.79305e-14	-1.13628							ENSG00000173531	MST1	1.50535e-19	1.71799
ENSG00000128268	MGAT3	3.70633e-14	-1.06069							ENSG00000173209	NA	1.5551e-19	1.73031
ENSG00000184545	DUSP8	4.22329e-14	1.86533							ENSG00000181754	AMIGO1	1.74388e-19	-1.03897
ENSG00000205420	KRT6A	3.88069e-14	1.3152							ENSG00000221978	CCNL2	1.91677e-19	1.39539
ENSG00000198355	PIM3	4.05442e-14	1.36656							ENSG00000217801	NA	2.23194e-19	1.73316
ENSG00000093134	NA	4.38055e-14	1.11842							ENSG00000157557	ETS2	2.09681e-19	1.06073
ENSG00000187905	LRRC74B	5.07163e-14	1.35666							ENSG00000142528	ZNF473	2.18138e-19	1.1136
ENSG00000140398	NEIL1	5.83359e-14	1.30869							ENSG00000198763	ND2	2.28129e-19	-1.01164
ENSG00000073756	PTGS2	8.12976e-14	2.95175							ENSG00000198355	PIM3	2.55478e-19	1.40242
ENSG00000210184	NA	5.3845e-14	-2.17595							ENSG00000279328	LOC124906280	3.34807e-19	2.24075
ENSG00000175197	DDIT3	8.54682e-14	2.05878							ENSG00000266714	MYO15B	3.1182e-19	1.86153
ENSG00000108773	KAT2A	8.54682e-14	1.18109							ENSG00000164066	INTU	3.34143e-19	1.12856
ENSG00000204622	NA	9.42483e-14	1.23127							ENSG00000160072	ATAD3B	3.45412e-19	1.24367
ENSG00000102878	HSF4	9.47873e-14	2.12954							ENSG00000276710	CSPG4P10	3.58703e-19	1.37756
ENSG00000085552	IGSF9	9.42483e-14	1.318							ENSG00000179698	WDR97	4.30219e-19	1.67559
ENSG00000215788	TNFRSF25	1.00599e-13	1.69621							ENSG00000132535	DLG4	4.17896e-19	1.12079
ENSG00000198753	PLXNB3	1.06693e-13	1.74249							ENSG00000208028	MIR616	2.49649e-20	5.50844
ENSG00000142871	CCN1	1.07621e-13	2.50638							ENSG00000146830	GIGYF1	4.41975e-19	1.06173
ENSG00000101445	PPP1R16B	1.14582e-13	-1.36808							ENSG00000214021	TTLL3	4.77368e-19	1.67587
ENSG00000196739	COL27A1	1.22705e-13	1.71788							ENSG00000101104	PABPC1L	5.21113e-19	2.0729
ENSG00000196123	MATCAP1	1.22689e-13	1.58775							ENSG00000127528	KLF2	4.92044e-19	1.92653
ENSG00000185101	ANO9	1.21981e-13	1.42027							ENSG00000076003	MCM6	5.693e-19	-1.04285
ENSG00000142686	C1orf216	1.37145e-13	-1.02142							ENSG00000187961	KLHL17	5.82397e-19	1.38708
ENSG00000240038	AMY2B	1.4155e-13	1.89182							ENSG00000169231	THBS3	5.53544e-19	1.7592
ENSG00000170465	KRT6C	1.68822e-13	1.10348							ENSG00000119508	NR4A3	7.06897e-19	2.82003
ENSG00000177595	PIDD1	1.62798e-13	1.32948							ENSG00000177943	MAMDC4	7.09477e-19	2.1761
ENSG00000198625	MDM4	1.61356e-13	1.04553							ENSG00000198563	DDX39B	7.15405e-19	1.37508
ENSG00000257671	KRT7-AS	1.53229e-13	2.26624							ENSG00000203799	CCDC162P	8.89678e-19	1.47536
ENSG00000198712	COX2	1.58876e-13	-1.14957							ENSG00000196123	MATCAP1	9.01612e-19	1.58927
ENSG00000135723	FHOD1	2.00632e-13	1.03143							ENSG00000269821	KCNQ1OT1	7.72492e-19	2.57008
ENSG00000131584	ACAP3	2.27589e-13	1.2789							ENSG00000134884	ARGLU1	9.00568e-19	1.06429
ENSG00000198517	MAFK	2.27589e-13	1.13222							ENSG00000146067	FAM193B	9.97039e-19	1.49854
ENSG00000209082	NA	2.70702e-13	-1.32497							ENSG00000106366	SERPINE1	1.05828e-18	1.6932
ENSG00000004777	ARHGAP33	2.76786e-13	1.53308							ENSG00000275888	NA	4.92044e-19	3.20701
ENSG00000135473	PAN2	2.74716e-13	1.16137							ENSG00000149591	TAGLN	1.20774e-18	1.3281
ENSG00000179094	PER1	2.55901e-13	1.32717							ENSG00000129991	TNNI3	1.17845e-18	2.0446
ENSG00000254815	LMNTD2-AS1	3.55354e-13	1.92583							ENSG00000005206	SPPL2B	1.1539e-18	1.0739
ENSG00000172349	IL16	3.71946e-13	1.3515							ENSG00000215252	GOLGA8B	1.41029e-18	2.23341
ENSG00000163874	ZC3H12A	3.28349e-13	1.61322							ENSG00000057657	PRDM1	1.40244e-18	1.78472
ENSG00000198695	ND6	3.28349e-13	-1.00585							ENSG00000176155	CCDC57	1.25656e-18	1.17053
ENSG00000177943	MAMDC4	3.87346e-13	2.2076							ENSG00000131044	TTLL9	1.51906e-18	1.02282
ENSG00000158286	RNF207	4.17641e-13	1.63829							ENSG00000167615	LENG8	1.51311e-18	1.57217
ENSG00000198899	ATP6	3.86525e-13	-1.01172							ENSG00000093134	NA	1.7613e-18	1.08339
ENSG00000168010	ATG16L2	4.1838e-13	1.26173							ENSG00000137817	PARP6	1.97058e-18	1.01709
ENSG00000108821	COL1A1	3.94237e-13	1.52546							ENSG00000142871	CCN1	2.01715e-18	2.4001
ENSG00000173531	MST1	4.43639e-13	1.5652							ENSG00000258388	PPT2-EGFL8	1.4643e-18	1.7564
ENSG00000179698	WDR97	4.6226e-13	1.5429							ENSG00000177595	PIDD1	2.82623e-18	1.30511
ENSG00000110455	ACCS	5.62296e-13	1.00639							ENSG00000197774	EME2	3.04914e-18	1.49457
ENSG00000279328	LOC124906280	6.02023e-13	1.99672							ENSG00000113108	APBB3	3.22775e-18	1.49766
ENSG00000272256	NA	6.04248e-13	1.63313							ENSG00000210144	NA	2.84465e-18	-1.31606
ENSG00000230551	NA	6.3628e-13	1.55329							ENSG00000210176	NA	2.56916e-18	-2.20636
ENSG00000146067	FAM193B	5.9185e-13	1.40435							ENSG00000185189	NRBP2	3.6904e-18	1.48786
ENSG00000105245	NUMBL	6.10978e-13	1.02838							ENSG00000238105	NA	3.76639e-18	1.55158
ENSG00000272645	NA	7.11546e-13	1.28681							ENSG00000198753	PLXNB3	4.46573e-18	1.55255
ENSG00000057657	PRDM1	7.48502e-13	1.81575							ENSG00000169429	CXCL8	3.6904e-18	2.34738
ENSG00000064218	DMRT3	8.0031e-13	-1.11531							ENSG00000276550	NA	4.43269e-18	1.45734
ENSG00000187609	EXD3	7.66699e-13	1.0091							ENSG00000259884	NR4A1AS	5.70473e-19	6.91068
ENSG00000258388	PPT2-EGFL8	5.43532e-13	1.76216							ENSG00000179094	PER1	3.94172e-18	1.34561
ENSG00000169231	THBS3	7.3236e-13	1.60665							ENSG00000259605	NA	5.18507e-18	1.50433
ENSG00000129991	TNNI3	9.1596e-13	1.96021							ENSG00000158286	RNF207	5.21506e-18	1.58617
ENSG00000112182	BACH2	9.60666e-13	-2.14199							ENSG00000110455	ACCS	5.13659e-18	1.032
ENSG00000266714	MYO15B	8.95603e-13	1.64638							ENSG00000210184	NA	3.01236e-18	-2.27394
ENSG00000144136	SLC20A1	8.83774e-13	1.28716							ENSG00000121716	PILRB	5.41515e-18	2.27804
ENSG00000111912	NCOA7	9.46075e-13	1.47585							ENSG00000103168	TAF1C	5.11896e-18	1.3615
ENSG00000145283	SLC10A6	7.11546e-13	2.1451							ENSG00000129757	CDKN1C	5.60184e-18	1.53594
ENSG00000168907	PLA2G4F	1.24584e-12	1.57259							ENSG00000241489	NA	6.12022e-18	1.8154
ENSG00000188290	HES4	1.24584e-12	1.13573							ENSG00000167702	KIFC2	6.30897e-18	1.88524
ENSG00000100429	HDAC10	1.4947e-12	1.23624							ENSG00000170629	NA	6.12022e-18	1.07148
ENSG00000221978	CCNL2	1.3739e-12	1.20677							ENSG00000008226	DLEC1	5.83997e-18	1.28332
ENSG00000142959	BEST4	1.55216e-12	1.62884							ENSG00000198517	MAFK	6.22974e-18	1.11838
ENSG00000139625	MAP3K12	1.83081e-12	1.06074							ENSG00000179532	DNHD1	7.15027e-18	1.63167
ENSG00000176155	CCDC57	1.6133e-12	1.05705							ENSG00000175265	GOLGA8A	7.6468e-18	2.83592
ENSG00000163121	NEURL3	2.02695e-12	-1.14577							ENSG00000187609	EXD3	7.33608e-18	1.02275
ENSG00000130702	LAMA5	1.65573e-12	1.44748							ENSG00000264175	MIR3189	1.01523e-18	5.86857
ENSG00000214021	TTLL3	1.79545e-12	1.46936							ENSG00000109046	WSB1	7.19104e-18	1.08863
ENSG00000275888	NA	1.06943e-12	3.18177							ENSG00000243679	NA	8.53659e-18	1.64435
ENSG00000228253	ATP8	1.80664e-12	-1.09261							ENSG00000272821	NA	8.67432e-18	1.95503
ENSG00000119508	NR4A3	2.09491e-12	3.25835							ENSG00000178038	ALS2CL	7.79757e-18	1.18671
ENSG00000173209	NA	1.95436e-12	1.46897							ENSG00000250295	RDH10-AS1	7.79757e-18	2.58026
ENSG00000167702	KIFC2	2.35863e-12	1.77594							ENSG00000108821	COL1A1	1.09776e-17	1.49125
ENSG00000197774	EME2	2.5973e-12	1.38867							ENSG00000117425	PTCH2	1.2798e-17	1.32737
ENSG00000113108	APBB3	2.76336e-12	1.38884							ENSG00000132424	PNISR	1.16902e-17	1.04454
ENSG00000101104	PABPC1L	2.76959e-12	1.79595							ENSG00000131591	C1orf159	1.43741e-17	1.19403
ENSG00000267322	SCARNA17	1.68485e-12	2.38406							ENSG00000269352	NA	1.47147e-17	2.08107
ENSG00000276550	NA	2.79723e-12	1.37941							ENSG00000272645	NA	1.58997e-17	1.24431
ENSG00000132793	LPIN3	2.99826e-12	1.51382							ENSG00000105717	PBX4	1.56609e-17	1.08984
ENSG00000115758	ODC1	2.48646e-12	1.28188							ENSG00000074855	ANO8	1.98946e-17	1.07372
ENSG00000121716	PILRB	3.94481e-12	2.07595							ENSG00000250091	DNAH10OS	1.78944e-17	1.55401
ENSG00000173334	TRIB1	3.60238e-12	1.45129							ENSG00000225630	MTND2P28	2.19584e-17	-1.09068
ENSG00000198563	DDX39B	3.73349e-12	1.19233							ENSG00000142686	C1orf216	2.32743e-17	-1.00528
ENSG00000010310	GIPR	4.03411e-12	1.14032							ENSG00000159899	NPR2	2.34642e-17	1.80272
ENSG00000276710	CSPG4P10	4.38271e-12	1.17477							ENSG00000131584	ACAP3	2.22228e-17	1.21912
ENSG00000246090	LOC100507053	5.39389e-12	1.46168							ENSG00000241404	EGFL8	2.01323e-17	2.34387
ENSG00000167280	ENGASE	4.93643e-12	1.16253							ENSG00000196295	NA	2.87733e-17	1.6825
ENSG00000275734	NA	5.81532e-12	1.31602							ENSG00000198712	COX2	2.51233e-17	-1.08598
ENSG00000175906	ARL4D	4.80533e-12	1.67613							ENSG00000162572	SCNN1D	2.98042e-17	2.07907
ENSG00000245848	CEBPA	5.7785e-12	-1.0372							ENSG00000242686	NA	1.96725e-17	2.10068
ENSG00000169252	ADRB2	6.61934e-12	1.17921							ENSG00000235703	EOLA2-DT	4.42838e-17	1.83554
ENSG00000272821	NA	6.95513e-12	1.86058							ENSG00000236384	LINC00479	4.55509e-17	1.23663
ENSG00000198786	ND5	5.91167e-12	-1.07915							ENSG00000236017	NA	3.87137e-17	2.43208
ENSG00000269821	KCNQ1OT1	7.01261e-12	2.10056							ENSG00000226380	NA	2.13912e-17	3.18418
ENSG00000185189	NRBP2	6.22356e-12	1.32043							ENSG00000272256	NA	4.62508e-17	1.46222
ENSG00000151376	ME3	7.17084e-12	1.06273							ENSG00000272752	STAG3L5P-PVRIG2P-PILRB	4.62508e-17	1.91145
ENSG00000217801	NA	8.67769e-12	1.39794							ENSG00000204149	AGAP6	5.31015e-17	1.59194
ENSG00000243284	VSIG8	8.12652e-12	1.53637							ENSG00000139631	CSAD	5.26179e-17	1.62301
ENSG00000167470	MIDN	7.35084e-12	1.09052							ENSG00000188818	ZDHHC11	5.31015e-17	1.30953
ENSG00000178038	ALS2CL	8.12652e-12	1.07205							ENSG00000107968	MAP3K8	5.38088e-17	1.10507
ENSG00000175265	GOLGA8A	9.94125e-12	2.55707							ENSG00000137801	THBS1	5.9143e-17	1.38677
ENSG00000130518	IQCN	1.04606e-11	1.73871							ENSG00000144136	SLC20A1	5.38198e-17	1.2603
ENSG00000136367	ZFHX2	1.05796e-11	1.09479							ENSG00000263050	NA	4.93825e-17	1.73107
ENSG00000167779	IGFBP6	1.16459e-11	1.30763							ENSG00000260565	NA	6.81954e-17	1.37399
ENSG00000103168	TAF1C	1.10799e-11	1.19595							ENSG00000161960	EIF4A1	6.50851e-17	1.17101
ENSG00000139289	PHLDA1	1.16459e-11	2.12324							ENSG00000173334	TRIB1	5.93868e-17	1.47698
ENSG00000160072	ATAD3B	1.32272e-11	1.00847							ENSG00000162241	SLC25A45	7.33915e-17	1.21029
ENSG00000137801	THBS1	1.36001e-11	1.32164							ENSG00000242086	SDHAP2	6.80693e-17	1.09478
ENSG00000179532	DNHD1	1.3742e-11	1.46085							ENSG00000229807	XIST	6.91446e-17	1.28781
ENSG00000215252	GOLGA8B	1.53528e-11	1.87034							ENSG00000138834	MAPK8IP3	6.50851e-17	1.54298
ENSG00000259884	NR4A1AS	2.67505e-12	6.88357							ENSG00000110169	HPX	6.80646e-17	2.0451
ENSG00000130827	PLXNA3	1.53511e-11	1.21349							ENSG00000140459	CYP11A1	8.24431e-17	1.64534
ENSG00000163354	DCST2	1.95196e-11	1.58127							ENSG00000186301	NA	8.38863e-17	2.12357
ENSG00000203799	CCDC162P	1.77972e-11	1.21791							ENSG00000222009	BTBD19	6.59695e-17	2.441
ENSG00000138834	MAPK8IP3	1.59838e-11	1.4359							ENSG00000135473	PAN2	7.87856e-17	1.06806
ENSG00000178919	FOXE1	1.93275e-11	1.2216							ENSG00000162891	IL20	1.36886e-17	4.70136
ENSG00000013810	TACC3	2.21386e-11	1.04723							ENSG00000160401	CFAP157	7.98755e-17	1.01821
ENSG00000180730	SHISA2	2.00444e-11	1.49935							ENSG00000280138	NA	1.01795e-16	2.72914
ENSG00000208028	MIR616	3.52872e-12	4.88224							ENSG00000210196	NA	1.01438e-16	-1.01679
ENSG00000131591	C1orf159	2.37651e-11	1.05997							ENSG00000182796	NA	1.07562e-16	1.07033
ENSG00000230453	ANKRD18B	2.67345e-11	1.37117							ENSG00000262580	NA	1.13665e-16	2.0074
ENSG00000280138	NA	3.04114e-11	2.69461							ENSG00000234771	NA	1.19567e-16	1.19713
ENSG00000105376	ICAM5	2.98311e-11	1.30434							ENSG00000163354	DCST2	1.13553e-16	1.73108
ENSG00000185522	LMNTD2	2.77036e-11	1.52531							ENSG00000185513	L3MBTL1	1.20193e-16	1.31707
ENSG00000259605	NA	3.14683e-11	1.29674							ENSG00000010282	HHATL	1.37946e-16	1.80078
ENSG00000134757	DSG3	2.72792e-11	1.09078							ENSG00000188290	HES4	1.18859e-16	1.08593
ENSG00000161960	EIF4A1	2.75814e-11	1.07851							ENSG00000167280	ENGASE	1.33162e-16	1.16238
ENSG00000272752	STAG3L5P-PVRIG2P-PILRB	3.1248e-11	1.76726							ENSG00000162576	MXRA8	1.65002e-16	1.89248
ENSG00000151224	MAT1A	3.27978e-11	1.1885							ENSG00000152117	NA	1.6206e-16	1.37003
ENSG00000213347	MXD3	3.66688e-11	1.36773							ENSG00000223705	NSUN5P1	1.6206e-16	1.43791
ENSG00000241489	NA	3.71962e-11	1.49747							ENSG00000185522	LMNTD2	1.62418e-16	1.6075
ENSG00000137193	PIM1	3.62356e-11	1.21679							ENSG00000205702	LOC105377203	1.18726e-16	2.63495
ENSG00000210194	NA	3.96313e-11	-1.31126							ENSG00000151224	MAT1A	1.94498e-16	1.2232
ENSG00000139631	CSAD	4.12298e-11	1.46178							ENSG00000161265	U2AF1L4	2.1177e-16	1.36159
ENSG00000106366	SERPINE1	4.12635e-11	1.38459							ENSG00000130518	IQCN	2.01412e-16	1.7755
ENSG00000161265	U2AF1L4	4.73051e-11	1.26068							ENSG00000114857	NKTR	1.88807e-16	1.44106
ENSG00000134830	C5AR2	4.81037e-11	2.98153							ENSG00000196337	CGB7	1.84211e-16	2.09954
ENSG00000269352	NA	4.95244e-11	1.79986							ENSG00000215769	ARHGAP27P1-BPTFP1-KPNA2P3	2.30733e-16	1.74409
ENSG00000164078	MST1R	4.02816e-11	1.02581							ENSG00000204681	GABBR1	2.22913e-16	2.36192
ENSG00000250295	RDH10-AS1	4.12298e-11	2.26614							ENSG00000248592	STIMATE-MUSTN1	2.32447e-16	1.42064
ENSG00000243679	NA	5.54844e-11	1.37335							ENSG00000213366	GSTM2	2.13752e-16	1.343
ENSG00000185112	FAM43A	5.68593e-11	2.12722							ENSG00000249715	FER1L5	2.31653e-16	1.51198
ENSG00000225697	SLC26A6	5.79284e-11	1.48582							ENSG00000184949	FAM227A	2.06135e-16	1.06409
ENSG00000008226	DLEC1	4.37134e-11	1.07824							ENSG00000167371	PRRT2	2.68484e-16	1.74912
ENSG00000234771	NA	5.81242e-11	1.08671							ENSG00000130702	LAMA5	2.08219e-16	1.40217
ENSG00000196295	NA	6.46967e-11	1.43651							ENSG00000132793	LPIN3	2.77673e-16	1.41339
ENSG00000140459	CYP11A1	7.1628e-11	1.45203							ENSG00000210164	NA	1.84211e-16	-2.09148
ENSG00000204681	GABBR1	7.53683e-11	2.33003							ENSG00000163121	NEURL3	2.99694e-16	-1.10275
ENSG00000260729	NA	6.93676e-11	2.14078							ENSG00000198039	ZNF273	2.51802e-16	1.04163
ENSG00000100068	NA	7.0676e-11	1.74959							ENSG00000273151	NA	3.00547e-16	1.87864
ENSG00000226380	NA	5.26719e-11	2.94528							ENSG00000127415	IDUA	2.99694e-16	1.38246
ENSG00000152117	NA	8.1845e-11	1.23237							ENSG00000137193	PIM1	2.99264e-16	1.26416
ENSG00000168970	JMJD7-PLA2G4B	8.6487e-11	2.10888							ENSG00000214279	SCART1	3.26013e-16	1.89949
ENSG00000269275	NA	8.65313e-11	1.11422							ENSG00000127586	CHTF18	3.37091e-16	1.12191
ENSG00000129757	CDKN1C	7.37789e-11	1.24624							ENSG00000260729	NA	3.24454e-16	2.19603
ENSG00000167302	TEPSIN	8.85723e-11	1.19381							ENSG00000273142	NA	3.81613e-16	1.60537
ENSG00000005001	PRSS22	7.12306e-11	1.07409							ENSG00000274272	NA	3.92857e-16	1.43575
ENSG00000264175	MIR3189	2.33533e-11	5.37129							ENSG00000241769	EOLA1-DT	3.59974e-16	1.72852
ENSG00000132326	PER2	7.2632e-11	1.15776							ENSG00000196739	COL27A1	4.06926e-16	1.35448
ENSG00000197989	SNHG12	9.46793e-11	1.35368							ENSG00000186166	CENATAC	4.37499e-16	1.4022
ENSG00000185513	L3MBTL1	9.18689e-11	1.17767							ENSG00000136244	IL6	1.76538e-16	4.57081
ENSG00000162576	MXRA8	1.11755e-10	1.73004							ENSG00000259820	NA	2.97517e-16	2.58631
ENSG00000274272	NA	1.12429e-10	1.32089							ENSG00000100968	NFATC4	4.50265e-16	1.05701
ENSG00000186301	NA	1.129e-10	1.92937							ENSG00000243284	VSIG8	4.51494e-16	1.44155
ENSG00000011028	MRC2	1.13255e-10	1.08323							ENSG00000230453	ANKRD18B	4.91456e-16	1.35219
ENSG00000169469	SPRR1B	1.03305e-10	1.89173							ENSG00000272512	NA	4.02355e-16	2.757
ENSG00000163739	CXCL1	8.88666e-11	1.20978							ENSG00000179406	LINC00174	5.46004e-16	1.58583
ENSG00000162572	SCNN1D	1.27041e-10	1.74386							ENSG00000180071	ANKRD18A	5.46014e-16	1.06915
ENSG00000163207	IVL	1.32959e-10	2.09501							ENSG00000135976	ANKRD36	5.60282e-16	1.31448
ENSG00000136244	IL6	3.10292e-11	5.54496							ENSG00000108515	ENO3	4.55392e-16	1.85188
ENSG00000066230	SLC9A3	1.22372e-10	1.50518							ENSG00000206077	ZDHHC11B	5.02909e-16	1.21518
ENSG00000212907	ND4L	9.77424e-11	-1.07839							ENSG00000246090	LOC100507053	5.34372e-16	1.35992
ENSG00000236384	LINC00479	1.37011e-10	1.08367							ENSG00000182841	NA	6.04458e-16	1.38122
ENSG00000114857	NKTR	1.09898e-10	1.28914							ENSG00000168970	JMJD7-PLA2G4B	6.10798e-16	2.19036
ENSG00000255026	NA	1.31927e-10	2.43088							ENSG00000167302	TEPSIN	6.07754e-16	1.25182
ENSG00000167615	LENG8	1.04304e-10	1.23337							ENSG00000163874	ZC3H12A	5.01786e-16	1.40233
ENSG00000010282	HHATL	1.48611e-10	1.66135							ENSG00000167766	ZNF83	5.41647e-16	1.13502
ENSG00000182841	NA	1.5622e-10	1.28273							ENSG00000175267	VWA3A	4.81871e-16	1.10674
ENSG00000127564	PKMYT1	1.45402e-10	1.88493							ENSG00000173295	FAM86B3P	6.43239e-16	1.28534
ENSG00000113361	CDH6	1.27331e-10	-1.20721							ENSG00000267395	DM1-AS	6.7225e-16	1.4469
ENSG00000243708	PLA2G4B	1.09093e-10	2.78974							ENSG00000166432	ZMAT1	6.83705e-16	1.49766
ENSG00000215769	ARHGAP27P1-BPTFP1-KPNA2P3	1.78686e-10	1.58512							ENSG00000185112	FAM43A	6.80247e-16	2.02813
ENSG00000145934	TENM2	1.88081e-10	1.25217							ENSG00000225032	LOC102723566	6.87074e-16	1.60489
ENSG00000243696	NA	1.99498e-10	1.7756							ENSG00000005001	PRSS22	5.94911e-16	1.13588
ENSG00000127415	IDUA	1.81576e-10	1.24642							ENSG00000243708	PLA2G4B	4.77607e-16	2.77488
ENSG00000265298	NA	2.2634e-10	1.71243							ENSG00000269091	NA	8.10385e-16	1.33785
ENSG00000242686	NA	1.88081e-10	1.6535							ENSG00000242294	NA	8.23697e-16	2.10299
ENSG00000162591	MEGF6	1.93656e-10	1.42322							ENSG00000213347	MXD3	8.81496e-16	1.35531
ENSG00000181790	ADGRB1	2.23631e-10	1.76182							ENSG00000139636	LMBR1L	8.45032e-16	1.00404
ENSG00000162891	IL20	5.43664e-11	4.44328							ENSG00000105376	ICAM5	8.94798e-16	1.21779
ENSG00000242294	NA	2.52919e-10	1.92454							ENSG00000206417	NA	7.80729e-16	1.49055
ENSG00000198435	NRARP	2.07726e-10	1.61543							ENSG00000228253	ATP8	7.5664e-16	-1.01698
ENSG00000259820	NA	1.90963e-10	2.48827							ENSG00000126790	L3HYPDH	1.13915e-15	1.1994
ENSG00000273599	NA	2.7518e-10	1.88467							ENSG00000102287	GABRE	1.1357e-15	2.36829
ENSG00000273151	NA	2.99046e-10	1.64964							ENSG00000184205	TSPYL2	9.76118e-16	1.03834
ENSG00000241404	EGFL8	2.81111e-10	1.88163							ENSG00000162006	MSLNL	8.35449e-16	2.84625
ENSG00000250091	DNAH10OS	3.03507e-10	1.25512							ENSG00000100288	CHKB	1.29013e-15	1.55538
ENSG00000238105	NA	2.24693e-10	1.21145							ENSG00000132680	KHDC4	1.1357e-15	1.1143
ENSG00000167766	ZNF83	2.5429e-10	1.01717							ENSG00000238039	NA	1.31999e-15	1.86193
ENSG00000223705	NSUN5P1	3.13079e-10	1.22184							ENSG00000223745	NA	1.27901e-15	1.36853
ENSG00000139880	CDH24	3.58228e-10	1.32857							ENSG00000243696	NA	1.36666e-15	1.8431
ENSG00000255031	NA	2.81111e-10	2.04576							ENSG00000145283	SLC10A6	1.22217e-15	1.56096
ENSG00000280162	NA	8.65313e-11	4.65027							ENSG00000101445	PPP1R16B	1.31142e-15	-1.17894
ENSG00000260565	NA	3.63291e-10	1.14319							ENSG00000118523	CCN2	1.1357e-15	1.08704
ENSG00000162241	SLC25A45	4.01868e-10	1.01882							ENSG00000180730	SHISA2	1.31314e-15	1.46044
ENSG00000184471	C1QTNF8	3.76281e-10	1.65839							ENSG00000279716	NA	1.50917e-15	1.78211
ENSG00000143434	SEMA6C	4.25448e-10	1.56882							ENSG00000012171	SEMA3B	1.8038e-15	1.6249
ENSG00000026036	RTEL1-TNFRSF6B	3.42829e-10	2.12054							ENSG00000265298	NA	1.81017e-15	1.75793
ENSG00000214279	SCART1	4.34472e-10	1.65242							ENSG00000196696	PDXDC2P-NPIPB14P	1.98999e-15	1.1231
ENSG00000108515	ENO3	4.01868e-10	1.68348							ENSG00000270069	NA	1.24056e-15	3.50968
ENSG00000188130	MAPK12	4.50106e-10	1.46268							ENSG00000258727	AP1G2-AS1	1.96733e-15	1.79289
ENSG00000166432	ZMAT1	4.77566e-10	1.315							ENSG00000160781	PAQR6	2.02813e-15	1.90962
ENSG00000262580	NA	5.30748e-10	1.71312							ENSG00000255026	NA	1.99073e-15	2.53095
ENSG00000185864	NPIPB4	5.55579e-10	1.80518							ENSG00000224251	NA	7.40715e-16	2.98499
ENSG00000188818	ZDHHC11	4.89194e-10	1.08659							ENSG00000228486	C2orf92	2.4252e-15	1.58416
ENSG00000204149	AGAP6	5.74214e-10	1.27342							ENSG00000136689	IL1RN	1.97035e-15	1.35395
ENSG00000236017	NA	6.57698e-10	1.85843							ENSG00000119714	GPR68	2.2241e-15	1.40815
ENSG00000223991	TANAR	6.62863e-10	1.95017							ENSG00000257524	NA	2.69249e-15	1.54914
ENSG00000272512	NA	5.8954e-10	2.52471							ENSG00000178821	TMEM52	2.7085e-15	1.71394
ENSG00000186847	KRT14	5.04215e-10	1.40305							ENSG00000172349	IL16	2.47888e-15	1.07954
ENSG00000135976	ANKRD36	6.72349e-10	1.15195							ENSG00000184441	NA	3.12477e-15	1.46082
ENSG00000279382	NA	7.14345e-10	2.08751							ENSG00000143382	ADAMTSL4	2.93976e-15	2.02555
ENSG00000196337	CGB7	6.92162e-10	1.77996							ENSG00000134830	C5AR2	3.37961e-15	2.28509
ENSG00000241769	EOLA1-DT	6.17257e-10	1.47163							ENSG00000245848	CEBPA	3.15686e-15	-1.01821
ENSG00000235703	EOLA2-DT	6.74836e-10	1.43727							ENSG00000197989	SNHG12	3.29066e-15	1.32162
ENSG00000179406	LINC00174	7.51413e-10	1.34966							ENSG00000167470	MIDN	2.58835e-15	1.03692
ENSG00000204410	MSH5	7.75237e-10	1.6328							ENSG00000182685	BRICD5	2.94669e-15	1.9326
ENSG00000206561	COLQ	7.38872e-10	1.4063							ENSG00000166126	AMN	3.22665e-15	1.06878
ENSG00000187583	PLEKHN1	8.51009e-10	1.2103							ENSG00000075826	SEC31B	3.73951e-15	2.00446
ENSG00000135424	ITGA7	9.08337e-10	1.22128							ENSG00000153291	SLC25A27	3.95407e-15	1.96107
ENSG00000225032	LOC102723566	9.141e-10	1.40158							ENSG00000181143	MUC16	3.08332e-15	1.04163
ENSG00000160678	S100A1	8.55718e-10	1.20711							ENSG00000130827	PLXNA3	3.47391e-15	1.14726
ENSG00000204172	AGAP9	9.28542e-10	1.59998							ENSG00000269275	NA	4.5869e-15	1.1591
ENSG00000137094	DNAJB5	9.27183e-10	1.14729							ENSG00000276216	NA	1.23171e-15	3.84981
ENSG00000012171	SEMA3B	9.08337e-10	1.45583							ENSG00000143434	SEMA6C	4.78686e-15	1.60585
ENSG00000182109	NA	9.51378e-10	1.83816							ENSG00000261286	ATP2C2-AS1	4.38216e-15	1.90755
ENSG00000124593	NA	8.27983e-10	1.24742							ENSG00000244560	NA	5.10133e-15	1.93666
ENSG00000137877	SPTBN5	9.81058e-10	1.72936							ENSG00000279602	NA	2.09046e-15	3.48324
ENSG00000280407	NA	6.95373e-10	2.25636							ENSG00000183921	SDR42E2	6.10557e-15	1.17239
ENSG00000167604	NFKBID	9.98817e-10	2.19115							ENSG00000223991	TANAR	6.91449e-15	1.97941
ENSG00000222009	BTBD19	1.01385e-09	1.95061							ENSG00000132326	PER2	5.01385e-15	1.16047
ENSG00000102287	GABRE	1.01368e-09	2.09568							ENSG00000224660	SH3BP5-AS1	7.85189e-15	1.47547
ENSG00000160781	PAQR6	1.13809e-09	1.71651							ENSG00000204172	AGAP9	7.88352e-15	1.76262
ENSG00000263050	NA	1.12024e-09	1.36006							ENSG00000130649	CYP2E1	7.28481e-15	1.59642
ENSG00000254413	CHKB-CPT1B	7.32482e-10	2.24835							ENSG00000166762	CATSPER2	8.83672e-15	1.85279
ENSG00000178821	TMEM52	1.36463e-09	1.55152							ENSG00000254413	CHKB-CPT1B	4.3814e-15	2.35238
ENSG00000087494	PTHLH	1.16791e-09	1.72115							ENSG00000273599	NA	1.01836e-14	1.82276
ENSG00000279602	NA	5.32338e-10	3.52184							ENSG00000244879	NA	8.95458e-15	1.25388
ENSG00000080947	CROCCP3	1.34381e-09	1.21847							ENSG00000229152	NA	8.79669e-15	1.92286
ENSG00000276216	NA	4.13121e-10	3.85341							ENSG00000197816	CCDC180	9.71025e-15	1.04255
ENSG00000185215	TNFAIP2	1.02293e-09	1.18104							ENSG00000163207	IVL	1.29044e-14	1.77666
ENSG00000167371	PRRT2	1.31717e-09	1.44217							ENSG00000258461	NA	1.27554e-14	2.07653
ENSG00000269091	NA	1.39073e-09	1.15569							ENSG00000164949	GEM	1.41262e-14	2.52558
ENSG00000267395	DM1-AS	1.45234e-09	1.24543							ENSG00000255182	NA	1.53954e-14	1.63759
ENSG00000246922	UBAP1L	1.30865e-09	1.96271							ENSG00000255031	NA	1.25359e-14	1.92495
ENSG00000130701	RBBP8NL	1.52319e-09	1.67088							ENSG00000222019	NA	1.49875e-14	1.74748
ENSG00000120875	DUSP4	1.03877e-09	1.05112							ENSG00000158815	FGF17	1.23825e-14	2.70375
ENSG00000100288	CHKB	1.60249e-09	1.33054							ENSG00000280407	NA	1.05646e-14	2.27321
ENSG00000214193	SH3D21	1.49337e-09	1.01412							ENSG00000213199	ASIC3	1.62942e-14	1.80724
ENSG00000249715	FER1L5	1.46595e-09	1.25234							ENSG00000141682	PMAIP1	1.38453e-14	1.18527
ENSG00000205702	LOC105377203	1.63694e-09	2.09272							ENSG00000167874	TMEM88	1.19502e-14	2.7776
ENSG00000119714	GPR68	1.83005e-09	1.25465							ENSG00000026036	RTEL1-TNFRSF6B	1.64023e-14	1.94654
ENSG00000162006	MSLNL	1.6388e-09	2.5056							ENSG00000279198	NA	1.48744e-14	3.22762
ENSG00000213366	GSTM2	1.6492e-09	1.09495							ENSG00000283259	NA	2.05688e-14	2.13524
ENSG00000206417	NA	2.08494e-09	1.27103							ENSG00000235706	DICER1-AS1	2.05688e-14	1.01406
ENSG00000165821	SALL2	2.32171e-09	-1.0456							ENSG00000275216	NA	1.8979e-14	2.41423
ENSG00000260005	NA	1.67044e-09	2.09002							ENSG00000167604	NFKBID	2.306e-14	2.07139
ENSG00000206077	ZDHHC11B	1.98323e-09	1.02367							ENSG00000100068	NA	2.2292e-14	1.57513
ENSG00000159899	NPR2	2.23781e-09	1.32145							ENSG00000279457	NA	2.38032e-14	1.03133
ENSG00000270069	NA	2.10598e-09	3.10652							ENSG00000225697	SLC26A6	2.40951e-14	1.32476
ENSG00000261286	ATP2C2-AS1	2.7254e-09	1.67297							ENSG00000198576	ARC	1.0314e-14	5.08296
ENSG00000186715	MST1L	2.5546e-09	1.96928							ENSG00000279382	NA	2.73745e-14	2.05298
ENSG00000235831	BHLHE40-AS1	2.7254e-09	1.61731							ENSG00000186715	MST1L	2.46146e-14	1.99093
ENSG00000261659	NA	3.04019e-09	1.05822							ENSG00000185864	NPIPB4	2.83814e-14	1.79725
ENSG00000255182	NA	3.22765e-09	1.47907							ENSG00000008710	PKD1	2.01479e-14	1.0167
ENSG00000265690	NA	2.37761e-09	2.28453							ENSG00000265018	NA	3.21465e-14	1.77559
ENSG00000229152	NA	3.11822e-09	1.70821							ENSG00000260005	NA	2.01763e-14	2.18497
ENSG00000257524	NA	3.51963e-09	1.36759							ENSG00000196296	ATP2A1	2.53609e-14	1.95134
ENSG00000130649	CYP2E1	3.52064e-09	1.41003							ENSG00000130653	PNPLA7	3.03777e-14	1.42744
ENSG00000249601	NA	2.55603e-09	2.44374							ENSG00000159784	FAM131B	3.3298e-14	-1.4739
ENSG00000138316	ADAMTS14	3.60319e-09	1.32728							ENSG00000275734	NA	4.05988e-14	1.04329
ENSG00000075826	SEC31B	3.80032e-09	1.70051							ENSG00000152518	ZFP36L2	2.88182e-14	1.02774
ENSG00000279141	LINC01451	3.82539e-09	1.85701							ENSG00000255847	NA	4.21973e-14	1.83518
ENSG00000167656	LY6D	3.82539e-09	1.42881							ENSG00000182873	PRKCZ-AS1	4.0129e-14	1.58178
ENSG00000279716	NA	4.12316e-09	1.47459							ENSG00000203814	H2BC18	4.36241e-14	1.01805
ENSG00000228486	C2orf92	3.98207e-09	1.32905							ENSG00000244161	FLNB-AS1	2.97968e-14	2.69355
ENSG00000237669	NA	4.49752e-09	1.17701							ENSG00000197978	GOLGA6L9	4.50998e-14	1.20855
ENSG00000273036	CYP4F33P	4.67983e-09	2.02761							ENSG00000163126	ANKRD23	5.28703e-14	1.41088
ENSG00000138109	CYP2C9	4.242e-09	2.91863							ENSG00000115758	ODC1	3.82174e-14	1.09042
ENSG00000069399	BCL3	3.26297e-09	1.45111							ENSG00000176593	ZNF606-AS1	5.48866e-14	1.2551
ENSG00000171848	RRM2	4.51547e-09	1.32845							ENSG00000267244	LOC100288123	6.2926e-14	1.85951
ENSG00000248592	STIMATE-MUSTN1	4.77167e-09	1.09406							ENSG00000178919	FOXE1	5.70794e-14	1.0581
ENSG00000213199	ASIC3	4.95139e-09	1.60689							ENSG00000135424	ITGA7	7.38447e-14	1.18331
ENSG00000166405	RIC3	4.97897e-09	1.35957							ENSG00000080947	CROCCP3	8.39267e-14	1.21405
ENSG00000185482	STAC3	4.51547e-09	1.69943							ENSG00000114204	SERPINI2	8.37467e-14	1.3591
ENSG00000238039	NA	5.0746e-09	1.46623							ENSG00000160678	S100A1	8.33055e-14	1.18096
ENSG00000278912	NA	3.97608e-09	2.43555							ENSG00000280927	CTBP1-AS	6.30273e-14	2.34025
ENSG00000164949	GEM	5.26925e-09	2.32627							ENSG00000175906	ARL4D	6.69437e-14	1.3926
ENSG00000279198	NA	4.51547e-09	3.01718							ENSG00000210194	NA	8.37467e-14	-1.2406
ENSG00000260592	LOC124903659	5.02597e-09	1.61214							ENSG00000273036	CYP4F33P	9.82856e-14	2.12394
ENSG00000173295	FAM86B3P	4.97897e-09	1.03107							ENSG00000171931	FBXW10	9.89289e-14	1.08606
ENSG00000280927	CTBP1-AS	4.39708e-09	2.2637							ENSG00000204410	MSH5	1.04586e-13	1.57327
ENSG00000274376	ADAMTS7P1	5.87928e-09	1.64619							ENSG00000263345	NA	7.96974e-14	2.40818
ENSG00000158815	FGF17	5.29603e-09	2.41867							ENSG00000085514	PILRA	5.82239e-14	2.31518
ENSG00000218416	GPC1-AS1	6.24448e-09	1.34451							ENSG00000137496	IL18BP	1.06318e-13	1.48727
ENSG00000198576	ARC	2.90992e-09	5.12893							ENSG00000239388	ASB14	1.11348e-13	1.65923
ENSG00000143382	ADAMTSL4	6.33929e-09	1.70281							ENSG00000185946	RNPC3	1.01258e-13	1.16163
ENSG00000265018	NA	6.60485e-09	1.62586							ENSG00000231160	NA	1.04586e-13	1.03049
ENSG00000258461	NA	6.73137e-09	1.81753							ENSG00000251432	LINC02615	1.16191e-13	1.62108
ENSG00000224975	INE1	6.16005e-09	1.96596							ENSG00000233198	RNF224	1.219e-13	1.66862
ENSG00000261505	NA	6.71498e-09	2.04122							ENSG00000224975	INE1	1.06397e-13	1.99871
ENSG00000105650	PDE4C	7.29093e-09	1.21865							ENSG00000246922	UBAP1L	1.0828e-13	1.87044
ENSG00000224251	NA	4.5082e-09	2.45761							ENSG00000226696	LENG8-AS1	1.27898e-13	1.17864
ENSG00000186166	CENATAC	7.33382e-09	1.07892							ENSG00000182109	NA	1.27753e-13	1.77301
ENSG00000273142	NA	6.9794e-09	1.22755							ENSG00000095752	IL11	1.06335e-13	1.83545
ENSG00000186204	CYP4F12	7.31782e-09	1.1788							ENSG00000250067	YJEFN3	1.3076e-13	2.182
ENSG00000122861	PLAU	6.30444e-09	1.64554							ENSG00000138316	ADAMTS14	1.30503e-13	1.3784
ENSG00000124143	ARHGAP40	8.81374e-09	1.29301							ENSG00000243716	NPIPB5	1.37004e-13	1.87157
ENSG00000167874	TMEM88	7.95149e-09	2.39769							ENSG00000164049	FBXW12	1.08243e-13	1.93838
ENSG00000011422	PLAUR	9.091e-09	2.14727							ENSG00000078401	EDN1	1.37004e-13	1.87559
ENSG00000184441	NA	1.00143e-08	1.20502							ENSG00000279182	NA	1.37679e-13	2.05936
ENSG00000226332	NA	9.5255e-09	1.98424							ENSG00000185482	STAC3	1.30503e-13	1.73195
ENSG00000144045	DQX1	1.02429e-08	1.02926							ENSG00000267493	CIRBP-AS1	1.47702e-13	1.43621
ENSG00000183963	SMTN	9.52171e-09	1.10022							ENSG00000137877	SPTBN5	1.6086e-13	1.61574
ENSG00000250067	YJEFN3	1.04948e-08	2.0974							ENSG00000280332	NA	1.01985e-13	2.15504
ENSG00000279159	NA	1.04065e-08	1.60111							ENSG00000229413	NA	1.53526e-13	1.74364
ENSG00000243716	NPIPB5	1.06103e-08	1.75045							ENSG00000163739	CXCL1	1.2196e-13	1.1225
ENSG00000232973	CYP1B1-AS1	1.08891e-08	1.4535							ENSG00000258839	MC1R	1.86213e-13	1.58061
ENSG00000185946	RNPC3	9.24227e-09	1.05118							ENSG00000100197	CYP2D6	1.96021e-13	1.7462
ENSG00000168309	FAM107A	1.00705e-08	-1.04794							ENSG00000185291	IL3RA	1.96021e-13	1.52618
ENSG00000184313	MROH7	6.90241e-09	2.92394							ENSG00000274512	TBC1D3	1.86213e-13	1.95589
ENSG00000280332	NA	8.98677e-09	1.92692							ENSG00000186204	CYP4F12	1.90358e-13	1.24709
ENSG00000176907	TCIM	1.17061e-08	2.81756							ENSG00000272556	NA	2.21581e-13	1.2192
ENSG00000130653	PNPLA7	1.03779e-08	1.21859							ENSG00000260428	SCX	1.77127e-13	1.90713
ENSG00000081320	STK17B	9.091e-09	1.01731							ENSG00000213398	LCAT	2.28487e-13	1.89152
ENSG00000260428	SCX	1.0921e-08	1.82538							ENSG00000249601	NA	1.80493e-13	2.25808
ENSG00000143546	S100A8	9.91841e-09	1.21934							ENSG00000279159	NA	2.53864e-13	1.66857
ENSG00000264785	NA	1.13375e-08	1.98343							ENSG00000280162	NA	9.4476e-14	3.93683
ENSG00000264577	NA	1.26122e-08	2.08449							ENSG00000135702	CHST5	2.243e-13	1.83844
ENSG00000253339	NA	1.19995e-08	1.13398							ENSG00000262903	NA	2.24658e-13	2.11799
ENSG00000258839	MC1R	1.43067e-08	1.44482							ENSG00000154734	ADAMTS1	2.57465e-13	1.90996
ENSG00000143630	HCN3	1.46464e-08	1.09232							ENSG00000228274	NA	2.67871e-13	1.53557
ENSG00000154734	ADAMTS1	1.34975e-08	1.89657							ENSG00000145113	MUC4	1.92753e-13	1.22839
ENSG00000110169	HPX	1.47288e-08	1.44709							ENSG00000243302	NA	3.01689e-13	1.48127
ENSG00000272078	NA	1.45983e-08	1.50934							ENSG00000236871	LINC00106	2.41209e-13	2.10952
ENSG00000134253	TRIM45	1.43775e-08	1.17668							ENSG00000111912	NCOA7	2.01891e-13	1.14917
ENSG00000244161	FLNB-AS1	1.19064e-08	2.36776							ENSG00000261505	NA	3.05839e-13	2.02873
ENSG00000129195	PIMREG	1.33621e-08	1.70114							ENSG00000264577	NA	2.77956e-13	2.11537
ENSG00000124882	EREG	1.46687e-08	2.48961							ENSG00000011422	PLAUR	3.02416e-13	2.06783
ENSG00000172818	OVOL1	1.38988e-08	1.53824							ENSG00000140465	CYP1A1	3.01475e-13	3.25286
ENSG00000229544	NKX1-2	1.68568e-08	-1.31066							ENSG00000227300	NA	3.38719e-13	4.08969
ENSG00000258727	AP1G2-AS1	1.70078e-08	1.4093							ENSG00000232931	NA	3.48116e-13	1.54857
ENSG00000196296	ATP2A1	1.5745e-08	1.68453							ENSG00000188130	MAPK12	3.59514e-13	1.31389
ENSG00000115008	IL1A	1.66942e-08	2.30229							ENSG00000267344	NA	2.49652e-13	2.43429
ENSG00000222019	NA	2.04329e-08	1.45619							ENSG00000114841	DNAH1	2.5913e-13	1.02702
ENSG00000078814	MYH7B	2.02852e-08	1.49171							ENSG00000196912	ANKRD36B	3.98388e-13	1.06318
ENSG00000182685	BRICD5	2.02214e-08	1.51343							ENSG00000167701	GPT	4.62739e-13	1.29024
ENSG00000274512	TBC1D3	2.01371e-08	1.77761							ENSG00000279141	LINC01451	4.67421e-13	1.82552
ENSG00000228274	NA	2.08139e-08	1.39501							ENSG00000278912	NA	3.59514e-13	2.37274
ENSG00000215559	NA	2.01352e-08	1.716							ENSG00000124593	NA	3.96916e-13	1.17407
ENSG00000239831	NA	2.01371e-08	1.78676							ENSG00000268945	NA	4.23433e-13	1.67403
ENSG00000213782	DDX47	2.36812e-08	1.30111							ENSG00000142748	FCN3	5.00249e-13	1.29014
ENSG00000204177	NA	2.39048e-08	1.08427							ENSG00000264112	NA	5.37643e-13	1.82122
ENSG00000244560	NA	2.44068e-08	1.5046							ENSG00000255306	NA	4.95533e-13	2.0888
ENSG00000141682	PMAIP1	1.75591e-08	1.00289							ENSG00000245849	RAD51-AS1	5.15859e-13	1.32433
ENSG00000230715	NA	2.50163e-08	1.38044							ENSG00000205890	LOC100128770	4.39105e-13	1.26287
ENSG00000160471	COX6B2	2.34499e-08	1.15059							ENSG00000179979	NA	5.41805e-13	1.06374
ENSG00000153291	SLC25A27	2.42085e-08	1.51112							ENSG00000230715	NA	6.05115e-13	1.49978
ENSG00000180089	TMEM86B	2.50644e-08	1.60277							ENSG00000167676	PLIN4	6.1405e-13	1.35483
ENSG00000263934	NA	2.14392e-08	2.394							ENSG00000255160	NA	6.26954e-13	1.43745
ENSG00000205517	RGL3	2.6331e-08	1.20021							ENSG00000227671	NA	5.56466e-13	1.18791
ENSG00000167676	PLIN4	2.42085e-08	1.23172							ENSG00000204177	NA	6.71432e-13	1.13535
ENSG00000183729	NA	2.71092e-08	-1.31223							ENSG00000166405	RIC3	6.67245e-13	1.33401
ENSG00000181649	PHLDA2	1.87368e-08	1.35218							ENSG00000260467	NA	6.49323e-13	1.58542
ENSG00000161912	NA	2.81554e-08	1.50026							ENSG00000274602	NA	7.40577e-13	1.51673
ENSG00000140465	CYP1A1	2.55986e-08	3.34285							ENSG00000209082	NA	6.62199e-13	-1.0137
ENSG00000279569	NA	2.81032e-08	1.40763							ENSG00000279801	LOC112268198	3.34552e-13	3.8846
ENSG00000205890	LOC100128770	2.17155e-08	1.16203							ENSG00000272141	NA	7.46521e-13	1.55447
ENSG00000069493	CLEC2D	2.85293e-08	1.53937							ENSG00000198569	SLC34A3	8.37604e-13	1.95361
ENSG00000261150	EPPK1	1.90275e-08	1.13047							ENSG00000138109	CYP2C9	9.06147e-13	2.6335
ENSG00000263345	NA	2.67628e-08	2.07789							ENSG00000143630	HCN3	9.66664e-13	1.12096
ENSG00000142748	FCN3	3.08244e-08	1.17906							ENSG00000226145	NA	6.57695e-13	2.84184
ENSG00000175505	CLCF1	2.4348e-08	1.7239							ENSG00000261488	TBILA	9.65226e-13	1.47555
ENSG00000223745	NA	2.41997e-08	1.03097							ENSG00000215559	NA	9.64693e-13	1.80349
ENSG00000186510	CLCNKA	3.11546e-08	1.19422							ENSG00000184313	MROH7	5.70652e-13	2.9685
ENSG00000243302	NA	3.11546e-08	1.32127							ENSG00000274376	ADAMTS7P1	1.09434e-12	1.61278
ENSG00000186648	CARMIL3	2.89339e-08	1.88985							ENSG00000265982	NA	1.06718e-12	1.7058
ENSG00000204305	AGER	3.50873e-08	1.4172							ENSG00000261971	LOC124900372	1.16991e-12	1.37208
ENSG00000107611	CUBN	3.50873e-08	1.45655							ENSG00000231868	NA	9.65226e-13	2.41068
ENSG00000188566	NDOR1	3.35461e-08	1.03138							ENSG00000272894	NA	1.17907e-12	1.02998
ENSG00000056558	TRAF1	3.56982e-08	1.53124							ENSG00000178773	CPNE7	1.19963e-12	1.36043
ENSG00000188234	AGAP4	3.43241e-08	1.1613							ENSG00000163216	SPRR2D	1.17381e-12	1.56685
ENSG00000260467	NA	3.61455e-08	1.47593							ENSG00000186510	CLCNKA	1.20831e-12	1.25881
ENSG00000267493	CIRBP-AS1	3.87218e-08	1.25834							ENSG00000237669	NA	1.21596e-12	1.05253
ENSG00000137496	IL18BP	4.1039e-08	1.27368							ENSG00000161912	NA	1.3338e-12	1.56449
ENSG00000262903	NA	3.91698e-08	1.8344							ENSG00000197182	MIRLET7BHG	1.36535e-12	1.94969
ENSG00000274602	NA	4.17668e-08	1.34764							ENSG00000115008	IL1A	1.37874e-12	2.03657
ENSG00000267344	NA	3.32963e-08	2.20952							ENSG00000226332	NA	1.33834e-12	1.88789
ENSG00000275216	NA	4.27027e-08	1.90417							ENSG00000184471	C1QTNF8	1.36114e-12	1.45808
ENSG00000178623	GPR35	4.36389e-08	1.2574							ENSG00000270605	NA	1.42262e-12	1.12704
ENSG00000185986	NA	4.51627e-08	1.2651							ENSG00000272078	NA	1.48903e-12	1.50708
ENSG00000100197	CYP2D6	4.54035e-08	1.64542							ENSG00000134253	TRIM45	1.48887e-12	1.18946
ENSG00000261971	LOC124900372	4.56307e-08	1.2951							ENSG00000198106	NA	1.52978e-12	1.06089
ENSG00000176593	ZNF606-AS1	3.76559e-08	1.06434							ENSG00000188234	AGAP4	1.57088e-12	1.23225
ENSG00000186567	CEACAM19	4.78289e-08	1.47528							ENSG00000235016	SEMA3F-AS1	1.56619e-12	1.92437
ENSG00000162757	C1orf74	4.10007e-08	1.28283							ENSG00000224593	RPL21P72	6.87779e-13	4.23702
ENSG00000167701	GPT	4.78289e-08	1.12531							ENSG00000154263	ABCA10	1.82559e-12	1.53761
ENSG00000182873	PRKCZ-AS1	4.99451e-08	1.28134							ENSG00000180089	TMEM86B	1.96667e-12	1.61334
ENSG00000167549	CORO6	4.29728e-08	2.41909							ENSG00000265678	NA	2.0889e-12	1.84055
ENSG00000262877	NA	4.16429e-08	2.19311							ENSG00000280334	NA	2.16156e-12	1.74283
ENSG00000227300	NA	5.13351e-08	4.20597							ENSG00000249816	LINC00964	1.91901e-12	1.2445
ENSG00000072195	SPEG	5.06201e-08	1.55397							ENSG00000159307	SCUBE1	2.39146e-12	1.71883
ENSG00000184163	C1QTNF12	5.23505e-08	1.67038							ENSG00000264772	NA	2.41292e-12	1.63183
ENSG00000154358	OBSCN	3.79392e-08	1.39025							ENSG00000172818	OVOL1	2.20672e-12	1.483
ENSG00000178726	THBD	4.44951e-08	1.54045							ENSG00000274627	NA	2.24572e-12	1.82627
ENSG00000224593	RPL21P72	2.7205e-08	4.16652							ENSG00000269621	NA	2.3791e-12	1.3545
ENSG00000250990	NA	6.07666e-08	1.57519							ENSG00000233392	UICLM	2.54291e-12	1.62236
ENSG00000233392	UICLM	5.93671e-08	1.53174							ENSG00000260337	NA	2.74829e-12	1.65716
ENSG00000205560	CPT1B	5.39908e-08	2.23149							ENSG00000230387	LINC03125	2.34939e-12	2.22337
ENSG00000129646	QRICH2	6.091e-08	1.09989							ENSG00000224090	LOC100129175	3.02477e-12	2.07759
ENSG00000226145	NA	4.94944e-08	2.64276							ENSG00000160471	COX6B2	3.42359e-12	1.14831
ENSG00000166762	CATSPER2	6.61187e-08	1.4002							ENSG00000262877	NA	3.32136e-12	2.05605
ENSG00000154263	ABCA10	6.66175e-08	1.41332							ENSG00000279569	NA	4.25003e-12	1.40913
ENSG00000161791	FMNL3	6.81216e-08	1.07201							ENSG00000122861	PLAU	3.01639e-12	1.52058
ENSG00000265982	NA	6.81943e-08	1.60056							ENSG00000157306	NA	3.67364e-12	1.91909
ENSG00000145040	UCN2	7.108e-08	2.10506							ENSG00000091536	MYO15A	4.44704e-12	1.19654
ENSG00000111788	NA	8.34812e-08	1.30626							ENSG00000269353	NA	4.07804e-12	2.83284
ENSG00000268945	NA	8.24755e-08	1.46623							ENSG00000074660	SCARF1	4.49205e-12	1.23682
ENSG00000095752	IL11	8.20908e-08	1.57443							ENSG00000145040	UCN2	3.7993e-12	2.14205
ENSG00000272556	NA	8.78959e-08	1.00894							ENSG00000265690	NA	4.04409e-12	1.87616
ENSG00000117407	ARTN	6.94979e-08	1.51623							ENSG00000263272	NA	4.30988e-12	1.82661
ENSG00000267244	LOC100288123	9.58176e-08	1.4881							ENSG00000181722	ZBTB20	4.51604e-12	1.12603
ENSG00000129204	USP6	9.65736e-08	1.66243							ENSG00000272669	NA	4.51604e-12	1.70506
ENSG00000163126	ANKRD23	9.84588e-08	1.12732							ENSG00000272578	NA	4.15498e-12	2.08505
ENSG00000232931	NA	9.26513e-08	1.3233							ENSG00000283445	NA	4.85339e-12	1.39389
ENSG00000111432	FZD10	1.01376e-07	2.39851							ENSG00000263934	NA	4.63957e-12	2.21909
ENSG00000114204	SERPINI2	9.02467e-08	1.10447							ENSG00000275895	LOC102724594	5.35605e-12	1.5313
ENSG00000075702	WDR62	1.04474e-07	1.06848							ENSG00000250461	NA	3.07615e-12	3.94909
ENSG00000006047	YBX2	1.07456e-07	1.10492							ENSG00000235831	BHLHE40-AS1	5.65816e-12	1.39713
ENSG00000260404	NA	9.79638e-08	1.12736							ENSG00000069493	CLEC2D	5.89575e-12	1.50424
ENSG00000164049	FBXW12	1.04832e-07	1.60517							ENSG00000186567	CEACAM19	6.04121e-12	1.52174
ENSG00000187642	PERM1	1.12908e-07	1.21463							ENSG00000099957	P2RX6	6.50284e-12	1.12405
ENSG00000160766	NA	1.14404e-07	1.39256							ENSG00000092529	CAPN3	5.45473e-12	2.64055
ENSG00000279182	NA	1.1858e-07	1.64679							ENSG00000184925	LCN12	6.43203e-12	1.80142
ENSG00000188185	NA	9.57199e-08	1.05782							ENSG00000228140	EFHD2-AS1	6.77282e-12	1.05407
ENSG00000261408	TEN1-CDK3	1.20426e-07	1.7191							ENSG00000260404	NA	6.50284e-12	1.18367
ENSG00000251432	LINC02615	1.25197e-07	1.3064							ENSG00000206561	COLQ	7.06105e-12	1.15919
ENSG00000244119	NA	1.13986e-07	1.90007							ENSG00000086159	AQP6	7.15585e-12	1.5879
ENSG00000091536	MYO15A	1.26772e-07	1.079							ENSG00000167549	CORO6	6.50284e-12	2.33774
ENSG00000283445	NA	1.3051e-07	1.26737							ENSG00000240053	LY6G5B	7.62345e-12	1.93428
ENSG00000279801	LOC112268198	7.41504e-08	3.581							ENSG00000267416	HEATR6-DT	7.5851e-12	1.6502
ENSG00000159784	FAM131B	1.22155e-07	-1.15095							ENSG00000242861	NA	8.22432e-12	1.24567
ENSG00000267049	NA	1.50013e-07	1.23585							ENSG00000102886	GDPD3	8.28482e-12	1.15692
ENSG00000264772	NA	1.52573e-07	1.47635							ENSG00000261408	TEN1-CDK3	8.67726e-12	1.76111
ENSG00000078401	EDN1	1.61985e-07	1.50901							ENSG00000277476	NA	8.90643e-12	1.49167
ENSG00000279693	NA	1.5789e-07	1.68							ENSG00000283189	NA	8.33249e-12	2.06732
ENSG00000136688	IL36G	1.63381e-07	2.48818							ENSG00000137070	IL11RA	9.58119e-12	1.41105
ENSG00000233198	RNF224	1.58144e-07	1.29195							ENSG00000215644	GCGR	6.1948e-12	1.97922
ENSG00000229413	NA	1.73185e-07	1.40711							ENSG00000162753	SLC9C2	1.02334e-11	1.62333
ENSG00000245849	RAD51-AS1	1.60217e-07	1.10789							ENSG00000267049	NA	1.07751e-11	1.2663
ENSG00000260285	NA	1.63531e-07	1.0294							ENSG00000130701	RBBP8NL	1.10226e-11	1.36489
ENSG00000185291	IL3RA	1.72116e-07	1.23326							ENSG00000129204	USP6	1.1504e-11	1.79421
ENSG00000101049	SGK2	1.70533e-07	2.05876							ENSG00000227232	NA	1.13663e-11	1.1466
ENSG00000255847	NA	1.99993e-07	1.37475							ENSG00000166535	A2ML1	1.17188e-11	1.56833
ENSG00000228748	NA	1.64278e-07	2.3609							ENSG00000176700	NA	1.21118e-11	1.11964
ENSG00000224660	SH3BP5-AS1	1.84392e-07	1.04852							ENSG00000111788	NA	1.28443e-11	1.34767
ENSG00000102886	GDPD3	2.27925e-07	1.07053							ENSG00000276570	NA	1.29813e-11	1.31272
ENSG00000212123	PRR22	2.28077e-07	1.50276							ENSG00000069399	BCL3	8.30364e-12	1.31964
ENSG00000261488	TBILA	2.30324e-07	1.21556							ENSG00000269194	LOC105372435	1.34915e-11	1.20448
ENSG00000154134	ROBO3	2.31659e-07	1.18179							ENSG00000212123	PRR22	1.37692e-11	1.58815
ENSG00000239388	ASB14	2.29566e-07	1.29291							ENSG00000253540	NA	1.3882e-11	1.17385
ENSG00000163216	SPRR2D	2.11735e-07	1.43505							ENSG00000164845	NA	1.31927e-11	1.00638
ENSG00000255306	NA	2.46117e-07	1.69242							ENSG00000185986	NA	1.41428e-11	1.2751
ENSG00000250899	NA	2.53955e-07	-1.00833							ENSG00000176907	TCIM	1.41254e-11	2.40565
ENSG00000242687	NA	2.60763e-07	1.56028							ENSG00000072195	SPEG	1.41957e-11	1.46335
ENSG00000280195	NA	2.65978e-07	1.12474							ENSG00000188185	NA	1.2249e-11	1.09211
ENSG00000178773	CPNE7	2.72242e-07	1.13626							ENSG00000228314	NA	1.50683e-11	1.53269
ENSG00000151651	ADAM8	2.27243e-07	1.09725							ENSG00000270189	NA	1.40518e-11	2.13341
ENSG00000269621	NA	2.74992e-07	1.17175							ENSG00000279693	NA	1.70441e-11	1.75032
ENSG00000198569	SLC34A3	2.61397e-07	1.5612							ENSG00000188566	NDOR1	1.64996e-11	1.00127
ENSG00000253540	NA	2.9131e-07	1.09864							ENSG00000056558	TRAF1	1.73993e-11	1.45748
ENSG00000215644	GCGR	2.43868e-07	1.72632							ENSG00000258472	NA	1.76186e-11	1.57122
ENSG00000120458	MSANTD2	2.87416e-07	1.12924							ENSG00000232973	CYP1B1-AS1	1.76728e-11	1.21574
ENSG00000170049	KCNAB3	2.99826e-07	1.86077							ENSG00000225783	MIAT	1.83833e-11	2.71482
ENSG00000228315	GUSBP11	3.13633e-07	1.55238							ENSG00000187479	C11orf96	1.29381e-11	5.8171
ENSG00000131747	TOP2A	2.33824e-07	1.15869							ENSG00000272734	NA	1.96438e-11	1.53733
ENSG00000227220	NA	3.17115e-07	1.71791							ENSG00000128383	APOBEC3A	2.0624e-11	2.32279
ENSG00000279806	NA	2.89238e-07	1.02788							ENSG00000135477	KRT87P	1.90721e-11	1.85076
ENSG00000213398	LCAT	3.30425e-07	1.48266							ENSG00000169246	NPIPB3	2.1894e-11	1.84263
ENSG00000198535	C2CD4A	3.24806e-07	1.55205							ENSG00000260592	LOC124903659	2.25543e-11	1.36958
ENSG00000228314	NA	3.4529e-07	1.37743							ENSG00000266106	NA	1.95838e-11	1.87765
ENSG00000082074	FYB1	3.41416e-07	1.32376							ENSG00000213782	DDX47	2.34843e-11	1.19839
ENSG00000137070	IL11RA	3.4529e-07	1.26122							ENSG00000186648	CARMIL3	2.17817e-11	1.73153
ENSG00000095970	TREM2	3.52539e-07	1.61459							ENSG00000183484	GPR132	2.35002e-11	1.50616
ENSG00000276570	NA	3.65146e-07	1.20267							ENSG00000028277	POU2F2	2.41269e-11	1.22403
ENSG00000111665	CDCA3	3.66082e-07	1.15323							ENSG00000170074	FAM153A	2.42813e-11	1.46687
ENSG00000267416	HEATR6-DT	3.67657e-07	1.5003							ENSG00000239831	NA	2.32465e-11	1.55378
ENSG00000184925	LCN12	3.82502e-07	1.61274							ENSG00000248124	NA	2.48764e-11	1.15475
ENSG00000146592	CREB5	3.95123e-07	2.68434							ENSG00000175505	CLCF1	1.91248e-11	1.57972
ENSG00000167524	RSKR	3.76092e-07	1.62908							ENSG00000274383	NA	2.53024e-11	2.04238
ENSG00000242861	NA	3.97948e-07	1.08387							ENSG00000110660	SLC35F2	2.33006e-11	-1.02904
ENSG00000275895	LOC102724594	4.03374e-07	1.27888							ENSG00000167524	RSKR	2.64669e-11	1.73822
ENSG00000265678	NA	4.17652e-07	1.54492							ENSG00000228315	GUSBP11	2.84724e-11	1.63052
ENSG00000177202	SPACA4	4.22345e-07	2.161							ENSG00000205560	CPT1B	2.70212e-11	2.11921
ENSG00000283259	NA	3.78124e-07	1.46495							ENSG00000203867	RBM20	2.48382e-11	1.29948
ENSG00000117983	MUC5B	2.39371e-07	1.11471							ENSG00000120458	MSANTD2	3.21763e-11	1.17873
ENSG00000266106	NA	4.13518e-07	1.70758							ENSG00000092929	UNC13D	3.37561e-11	1.2406
ENSG00000176700	NA	4.43699e-07	1.01599							ENSG00000101049	SGK2	2.70982e-11	2.18249
ENSG00000230387	LINC03125	4.14012e-07	1.94297							ENSG00000177202	SPACA4	3.46848e-11	2.25041
ENSG00000250461	NA	3.22515e-07	3.63141							ENSG00000246339	EXTL3-AS1	3.73562e-11	1.52173
ENSG00000226562	CYP4F26P	4.53354e-07	1.33426							ENSG00000151651	ADAM8	3.19443e-11	1.13306
ENSG00000127533	F2RL3	4.20761e-07	2.05504							ENSG00000138623	SEMA7A	3.88638e-11	2.53866
ENSG00000237649	KIFC1	4.49372e-07	1.07399							ENSG00000205517	RGL3	3.94933e-11	1.08784
ENSG00000224090	LOC100129175	4.9672e-07	1.72465							ENSG00000204305	AGER	3.98155e-11	1.29206
ENSG00000281490	NA	4.27413e-07	1.39536							ENSG00000146592	CREB5	4.25454e-11	2.60453
ENSG00000085465	OVGP1	5.49059e-07	1.04254							ENSG00000160201	U2AF1	4.06891e-11	1.48072
ENSG00000235016	SEMA3F-AS1	5.65934e-07	1.57446							ENSG00000089685	BIRC5	3.91091e-11	-1.06761
ENSG00000263272	NA	6.03168e-07	1.52528							ENSG00000267523	NA	3.8075e-11	2.22022
ENSG00000101115	SALL4	6.19858e-07	1.43817							ENSG00000139289	PHLDA1	2.85769e-11	1.39832
ENSG00000135702	CHST5	6.18926e-07	1.3944							ENSG00000258623	NA	5.20228e-11	1.26964
ENSG00000164690	SHH	6.17901e-07	1.28539							ENSG00000152137	HSPB8	5.44061e-11	1.27049
ENSG00000169474	SPRR1A	5.8416e-07	1.83592							ENSG00000142233	NTN5	4.57963e-11	2.09358
ENSG00000085514	PILRA	6.13054e-07	1.56327							ENSG00000250990	NA	5.62076e-11	1.44418
ENSG00000255160	NA	5.88114e-07	1.14869							ENSG00000276409	CCL14	6.03336e-11	1.27281
ENSG00000213780	GTF2H4	6.87476e-07	1.08811							ENSG00000107611	CUBN	5.96459e-11	1.3111
ENSG00000187479	C11orf96	4.85458e-07	5.79926							ENSG00000197768	STPG3	5.15754e-11	2.21507
ENSG00000204248	COL11A2	5.0679e-07	2.69172							ENSG00000242687	NA	6.33529e-11	1.55593
ENSG00000047936	ROS1	5.88114e-07	1.93543							ENSG00000187775	DNAH17	6.46026e-11	1.23904
ENSG00000269353	NA	7.26871e-07	2.33257							ENSG00000169085	VXN	5.20228e-11	1.82029
ENSG00000231868	NA	7.34227e-07	1.86247							ENSG00000198435	NRARP	4.11649e-11	1.20761
ENSG00000179593	ALOX15B	6.61201e-07	1.05816							ENSG00000261324	NA	6.58759e-11	1.61098
ENSG00000159307	SCUBE1	7.29577e-07	1.4117							ENSG00000169436	COL22A1	6.1706e-11	1.69536
ENSG00000236871	LINC00106	7.81675e-07	1.54266							ENSG00000257270	NA	6.59139e-11	1.64077
ENSG00000068489	PRR11	8.02794e-07	1.2012							ENSG00000133466	C1QTNF6	7.0974e-11	1.26971
ENSG00000135451	TROAP	8.01665e-07	1.7188							ENSG00000206344	HCG27	7.18395e-11	1.98557
ENSG00000175602	CCDC85B	4.91282e-07	1.04826							ENSG00000260563	NA	8.56081e-11	1.13928
ENSG00000009950	MLXIPL	8.12238e-07	1.51273							ENSG00000066230	SLC9A3	6.74201e-11	1.11998
ENSG00000258472	NA	8.71724e-07	1.34136							ENSG00000225828	FAM229A	1.07484e-10	1.32752
ENSG00000133466	C1QTNF6	8.02794e-07	1.17409							ENSG00000226562	CYP4F26P	1.08534e-10	1.36353
ENSG00000261884	NA	9.02638e-07	1.39532							ENSG00000258699	NA	1.06391e-10	1.47746
ENSG00000269194	LOC105372435	9.07752e-07	1.03001							ENSG00000169474	SPRR1A	1.02615e-10	1.78159
ENSG00000233377	NA	8.50271e-07	2.30466							ENSG00000270015	NA	1.1516e-10	1.05497
ENSG00000133246	PRAM1	9.33085e-07	1.74522							ENSG00000117016	RIMS3	1.1516e-10	-1.0075
ENSG00000277476	NA	1.05177e-06	1.22779							ENSG00000177990	DPY19L2	1.1396e-10	1.02612
ENSG00000073670	ADAM11	1.02283e-06	1.58978							ENSG00000009950	MLXIPL	1.19018e-10	1.5843
ENSG00000128383	APOBEC3A	1.09401e-06	2.10426							ENSG00000233377	NA	9.76409e-11	2.45684
ENSG00000197093	GAL3ST4	1.10912e-06	1.03765							ENSG00000204248	COL11A2	9.40278e-11	2.64082
ENSG00000272669	NA	1.11039e-06	1.38369							ENSG00000087494	PTHLH	1.0655e-10	1.34255
ENSG00000272734	NA	9.9822e-07	1.31915							ENSG00000181649	PHLDA2	9.43441e-11	1.19527
ENSG00000272141	NA	8.28695e-07	1.19758							ENSG00000279407	NA	1.74224e-10	1.64055
ENSG00000214856	NA	7.64726e-07	4.11404							ENSG00000178623	GPR35	1.73582e-10	1.11134
ENSG00000157306	NA	1.19624e-06	1.51864							ENSG00000205502	C2CD4B	1.67954e-10	1.79732
ENSG00000169246	NPIPB3	1.2446e-06	1.60201							ENSG00000197558	SSPOP	1.63883e-10	1.67508
ENSG00000248124	NA	1.22381e-06	1.00304							ENSG00000228526	MIR34AHG	1.61505e-10	1.2555
ENSG00000148600	CDHR1	1.21904e-06	1.29514							ENSG00000257489	NA	1.80592e-10	1.41068
ENSG00000246339	EXTL3-AS1	1.38751e-06	1.36037							ENSG00000235245	NA	1.97756e-10	1.46866
ENSG00000205885	C1RL-AS1	1.37018e-06	1.10001							ENSG00000223401	NA	1.97704e-10	1.4884
ENSG00000279407	NA	1.49803e-06	1.54016							ENSG00000111432	FZD10	2.07091e-10	2.1195
ENSG00000167377	ZNF23	1.43972e-06	1.2297							ENSG00000154258	ABCA9	2.06875e-10	1.34698
ENSG00000203867	RBM20	1.13624e-06	1.11079							ENSG00000154358	OBSCN	1.34505e-10	1.27012
ENSG00000166924	NYAP1	1.65093e-06	1.08115							ENSG00000073670	ADAM11	1.95143e-10	1.73875
ENSG00000127129	EDN2	1.65445e-06	2.49313							ENSG00000085465	OVGP1	2.43527e-10	1.05629
ENSG00000258699	NA	1.56494e-06	1.30579							ENSG00000225855	RUSC1-AS1	2.44738e-10	1.21447
ENSG00000214826	NA	1.72787e-06	1.32358							ENSG00000117318	ID3	1.82195e-10	1.10198
ENSG00000142233	NTN5	1.72435e-06	1.75077							ENSG00000280063	NA	2.66364e-10	1.74218
ENSG00000028277	POU2F2	1.77127e-06	1.03543							ENSG00000162591	MEGF6	1.82766e-10	1.01027
ENSG00000109063	MYH3	1.86769e-06	1.37324							ENSG00000101194	SLC17A9	2.73796e-10	1.43401
ENSG00000197182	MIRLET7BHG	1.65445e-06	1.45513							ENSG00000203761	NA	2.70403e-10	1.07903
ENSG00000138623	SEMA7A	1.83292e-06	2.30119							ENSG00000167377	ZNF23	2.81325e-10	1.29715
ENSG00000188004	SNHG28	1.87086e-06	1.08426							ENSG00000198535	C2CD4A	2.81325e-10	1.38851
ENSG00000152137	HSPB8	1.96135e-06	1.1698							ENSG00000255093	NA	3.03294e-10	1.30252
ENSG00000169035	KLK7	1.87495e-06	1.10316							ENSG00000203709	NA	2.90834e-10	1.09359
ENSG00000135253	KCP	1.88482e-06	1.11918							ENSG00000078814	MYH7B	3.17749e-10	1.26531
ENSG00000215241	LINC02449	2.14072e-06	1.25353							ENSG00000228748	NA	2.81245e-10	2.05453
ENSG00000270189	NA	2.09582e-06	1.71421							ENSG00000133246	PRAM1	2.77548e-10	1.82448
ENSG00000229951	FOSL2-AS1	2.14788e-06	1.01458							ENSG00000241288	LINC02614	3.27418e-10	1.0015
ENSG00000174099	MSRB3	1.66737e-06	-1.04931							ENSG00000259865	NA	3.55003e-10	1.00613
ENSG00000123485	HJURP	2.23721e-06	1.34805							ENSG00000205885	C1RL-AS1	3.56539e-10	1.13204
ENSG00000103044	HAS3	1.28632e-06	1.62399							ENSG00000244242	IFITM10	2.49698e-10	1.07778
ENSG00000274627	NA	2.37628e-06	1.37784							ENSG00000101115	SALL4	3.78355e-10	1.41239
ENSG00000187775	DNAH17	2.36292e-06	1.06527							ENSG00000169035	KLK7	3.59951e-10	1.08676
ENSG00000268049	NA	2.57083e-06	1.48398							ENSG00000239665	NA	3.64588e-10	1.08516
ENSG00000225783	MIAT	2.61465e-06	2.15272							ENSG00000244119	NA	4.14392e-10	1.70105
ENSG00000214822	NA	2.49991e-06	2.50883							ENSG00000117407	ARTN	3.31126e-10	1.31572
ENSG00000138061	CYP1B1	1.33852e-06	1.07024							ENSG00000250899	NA	6.11331e-10	-1.01557
ENSG00000092529	CAPN3	2.69635e-06	1.98471							ENSG00000267078	NA	6.10801e-10	1.51123
ENSG00000203896	LIME1	2.72023e-06	1.13748							ENSG00000124882	EREG	5.16707e-10	1.75414
ENSG00000267523	NA	2.74045e-06	1.84504							ENSG00000225889	NA	7.1364e-10	1.27088
ENSG00000250602	NA	3.13703e-06	1.32583							ENSG00000214856	NA	5.18938e-10	3.82546
ENSG00000183484	GPR132	3.24549e-06	1.24987							ENSG00000229544	NKX1-2	7.98878e-10	-1.18724
ENSG00000171401	KRT13	1.76399e-06	1.39023							ENSG00000170049	KCNAB3	8.25727e-10	1.68963
ENSG00000206344	HCG27	3.3753e-06	1.66308							ENSG00000241794	SPRR2A	8.57891e-10	1.17343
ENSG00000092929	UNC13D	3.53727e-06	1.03255							ENSG00000222047	C10orf55	9.48572e-10	2.35901
ENSG00000143367	TUFT1	2.00673e-06	1.48495							ENSG00000162757	C1orf74	7.30411e-10	1.05285
ENSG00000185338	SOCS1	3.6855e-06	1.53364							ENSG00000154134	ROBO3	9.97911e-10	1.14291
ENSG00000170074	FAM153A	3.46118e-06	1.22621							ENSG00000234459	NA	1.07755e-09	1.50032
ENSG00000276409	CCL14	3.77207e-06	1.07436							ENSG00000188004	SNHG28	1.08369e-09	1.1076
ENSG00000137804	NUSAP1	3.3567e-06	1.12519							ENSG00000135253	KCP	1.03949e-09	1.09275
ENSG00000283189	NA	3.92888e-06	1.56657							ENSG00000227220	NA	1.14273e-09	1.53425
ENSG00000197837	H4C16	3.7695e-06	1.06991							ENSG00000250602	NA	1.15308e-09	1.35973
ENSG00000261324	NA	3.77724e-06	1.34597							ENSG00000264785	NA	1.16235e-09	1.36854
ENSG00000267078	NA	3.6982e-06	1.38393							ENSG00000166924	NYAP1	1.31285e-09	1.05894
ENSG00000264112	NA	3.55505e-06	1.23058							ENSG00000143387	CTSK	1.41608e-09	1.30307
ENSG00000053438	NNAT	4.11584e-06	1.31005							ENSG00000099251	NA	1.39704e-09	1.19091
ENSG00000259972	NA	4.27222e-06	1.37284							ENSG00000260001	TGFBR3L	1.36893e-09	1.01151
ENSG00000280334	NA	3.70459e-06	1.24583							ENSG00000268049	NA	1.52812e-09	1.47746
ENSG00000261863	LINC01996	4.36003e-06	1.39037							ENSG00000197837	H4C16	1.52228e-09	1.13057
ENSG00000093009	CDC45	4.63939e-06	1.01386							ENSG00000271895	NA	1.55643e-09	1.13331
ENSG00000086159	AQP6	4.62202e-06	1.20909							ENSG00000261884	NA	1.58138e-09	1.30497
ENSG00000260001	TGFBR3L	4.645e-06	1.01783							ENSG00000110680	CALCA	1.4256e-09	1.04169
ENSG00000225889	NA	4.91486e-06	1.13572							ENSG00000162779	AXDND1	1.64036e-09	1.15772
ENSG00000240053	LY6G5B	4.94002e-06	1.41649							ENSG00000271430	NA	1.6528e-09	1.25427
ENSG00000228727	SAPCD1	5.03721e-06	1.14907							ENSG00000242349	NA	1.90133e-09	1.39721
ENSG00000163734	CXCL3	4.78074e-06	1.92001							ENSG00000247157	LINC01252	1.92904e-09	1.35832
ENSG00000272578	NA	5.32339e-06	1.5208							ENSG00000215241	LINC02449	1.96614e-09	1.23762
ENSG00000166535	A2ML1	4.70108e-06	1.23821							ENSG00000169469	SPRR1B	1.15035e-09	1.12436
ENSG00000223401	NA	5.42453e-06	1.29435							ENSG00000187642	PERM1	1.96012e-09	1.00061
ENSG00000167971	CASKIN1	5.94681e-06	1.22532							ENSG00000218416	GPC1-AS1	1.97688e-09	1.002
ENSG00000260337	NA	5.84389e-06	1.16134							ENSG00000117983	MUC5B	1.26124e-09	1.05379
ENSG00000237674	NA	6.27483e-06	1.19564							ENSG00000214694	ARHGEF33	2.87934e-09	1.33763
ENSG00000105664	COMP	6.6238e-06	1.77156							ENSG00000189120	SP6	2.87934e-09	1.31063
ENSG00000257270	NA	7.29561e-06	1.32958							ENSG00000160766	NA	3.11182e-09	1.10706
ENSG00000080986	NDC80	7.33589e-06	1.26266							ENSG00000246575	NA	3.45619e-09	1.50307
ENSG00000163357	DCST1	7.54058e-06	1.03604							ENSG00000198976	MIR429	3.60631e-09	1.47947
ENSG00000271430	NA	7.37686e-06	1.15162							ENSG00000281490	NA	3.01339e-09	1.2385
ENSG00000145386	CCNA2	7.37686e-06	1.16154							ENSG00000244932	NA	3.90182e-09	1.26812
ENSG00000280109	PLAC4	7.86476e-06	1.26763							ENSG00000116883	NA	3.98133e-09	1.48764
ENSG00000175063	UBE2C	7.85489e-06	1.1947							ENSG00000164690	SHH	3.7839e-09	1.08965
ENSG00000183856	IQGAP3	8.36042e-06	2.0243							ENSG00000182230	NA	3.58761e-09	1.72577
ENSG00000142303	ADAMTS10	8.73466e-06	1.97183							ENSG00000120093	HOXB3	4.12426e-09	1.05372
ENSG00000170509	HSD17B13	7.98827e-06	-1.0466							ENSG00000183729	NA	4.70138e-09	-1.17436
ENSG00000120093	HOXB3	8.36042e-06	1.02938							ENSG00000244480	NA	4.1033e-09	2.05743
ENSG00000135477	KRT87P	9.57041e-06	1.40854							ENSG00000163209	SPRR3	4.40197e-09	1.53822
ENSG00000149781	FERMT3	1.0097e-05	1.64067							ENSG00000138180	CEP55	4.57497e-09	-1.03604
ENSG00000176222	ZNF404	9.9839e-06	1.05438							ENSG00000259891	NA	5.31145e-09	1.20509
ENSG00000145824	CXCL14	8.36042e-06	1.02157							ENSG00000197953	AADACL2	5.53522e-09	1.07383
ENSG00000214694	ARHGEF33	1.03948e-05	1.23757							ENSG00000149781	FERMT3	5.44766e-09	1.76694
ENSG00000168477	TNXB	9.18594e-06	1.05427							ENSG00000136688	IL36G	5.59424e-09	1.64384
ENSG00000099625	CBARP	1.07834e-05	2.06985							ENSG00000229900	NA	6.03012e-09	1.26456
ENSG00000160201	U2AF1	1.12006e-05	1.18236							ENSG00000230928	NA	5.90437e-09	2.56481
ENSG00000140519	RHCG	1.10362e-05	1.3402							ENSG00000163357	DCST1	6.50618e-09	1.13001
ENSG00000197768	STPG3	1.17649e-05	1.64723							ENSG00000255745	LOC124902897	5.80294e-09	1.14544
ENSG00000133392	MYH11	1.17795e-05	1.07553							ENSG00000120457	KCNJ5	6.88691e-09	-1.0815
ENSG00000138180	CEP55	1.23249e-05	1.28709							ENSG00000161647	MPP3	6.85033e-09	1.02451
ENSG00000241794	SPRR2A	1.05706e-05	1.07895							ENSG00000118557	PMFBP1	7.50167e-09	1.27512
ENSG00000125538	IL1B	1.19312e-05	2.80908							ENSG00000259972	NA	8.7945e-09	1.34057
ENSG00000225828	FAM229A	1.27414e-05	1.04512							ENSG00000214822	NA	8.9928e-09	2.06466
ENSG00000066279	ASPM	1.33116e-05	1.55791							ENSG00000105509	HAS1	8.57769e-09	2.71451
ENSG00000255093	NA	1.29439e-05	1.04558							ENSG00000180383	DEFB124	1.01922e-08	1.39735
ENSG00000143387	CTSK	1.44143e-05	1.14518							ENSG00000251364	SYT9-AS1	1.09253e-08	1.13233
ENSG00000169085	VXN	1.51798e-05	1.32832							ENSG00000240731	NA	1.19626e-08	1.29378
ENSG00000260807	CEROX1	1.55254e-05	1.68667							ENSG00000140519	RHCG	1.2072e-08	1.26221
ENSG00000128510	CPA4	1.53453e-05	1.36898							ENSG00000133392	MYH11	1.22645e-08	1.06702
ENSG00000188015	S100A3	1.57494e-05	1.81122							ENSG00000099625	CBARP	1.2515e-08	1.92373
ENSG00000237017	NA	1.69693e-05	1.14333							ENSG00000260261	NA	1.31016e-08	1.43358
ENSG00000169436	COL22A1	1.91145e-05	1.2409							ENSG00000228727	SAPCD1	1.36566e-08	1.13196
ENSG00000166803	PCLAF	1.94596e-05	1.01629							ENSG00000127533	F2RL3	1.41787e-08	1.48276
ENSG00000178999	AURKB	1.97856e-05	1.56886							ENSG00000124440	HIF3A	1.59309e-08	1.10283
ENSG00000148773	MKI67	1.55155e-05	1.58328							ENSG00000127129	EDN2	1.81013e-08	2.08339
ENSG00000117507	NA	1.56672e-05	1.02006							ENSG00000235772	NA	2.0914e-08	1.02006
ENSG00000148926	ADM	1.9631e-05	1.67237							ENSG00000125845	BMP2	2.33323e-08	1.14553
ENSG00000247844	NA	2.14842e-05	1.0263							ENSG00000203896	LIME1	2.51385e-08	1.01133
ENSG00000197558	SSPOP	2.53175e-05	1.27793							ENSG00000232344	LOC100419436	2.7453e-08	1.6863
ENSG00000132530	XAF1	2.12683e-05	1.04361							ENSG00000235027	PRADX	3.03074e-08	1.07782
ENSG00000230928	NA	2.55263e-05	2.32749							ENSG00000104894	CD37	2.869e-08	1.18034
ENSG00000247157	LINC01252	2.73101e-05	1.15253							ENSG00000167971	CASKIN1	3.20468e-08	1.12615
ENSG00000168542	COL3A1	2.71842e-05	1.15318							ENSG00000183091	NEB	3.17564e-08	1.18418
ENSG00000104894	CD37	2.52479e-05	1.12644							ENSG00000188738	FSIP2	3.52802e-08	1.31058
ENSG00000222047	C10orf55	3.03801e-05	1.98948							ENSG00000109063	MYH3	3.54507e-08	1.2185
ENSG00000257800	NA	3.10433e-05	1.07109							ENSG00000163734	CXCL3	2.96618e-08	1.56908
ENSG00000278662	GOLGA6L4	2.71485e-05	1.0113							ENSG00000258676	NA	4.37647e-08	1.50441
ENSG00000199753	SNORD104	3.17871e-05	1.44985							ENSG00000101187	SLCO4A1	4.34132e-08	1.62777
ENSG00000101194	SLC17A9	3.19558e-05	1.05624							ENSG00000232411	NA	4.7373e-08	1.68404
ENSG00000162753	SLC9C2	3.12531e-05	1.07595							ENSG00000278662	GOLGA6L4	4.32484e-08	1.01193
ENSG00000235245	NA	3.28809e-05	1.09574							ENSG00000132530	XAF1	4.37647e-08	1.04136
ENSG00000205502	C2CD4B	2.85806e-05	1.34695							ENSG00000227218	LOC124902280	5.73644e-08	1.08281
ENSG00000229900	NA	3.55361e-05	1.15448							ENSG00000261863	LINC01996	5.71521e-08	1.22014
ENSG00000197847	NA	3.91952e-05	1.02547							ENSG00000237674	NA	6.1851e-08	1.11239
ENSG00000259891	NA	3.91763e-05	1.0241							ENSG00000188015	S100A3	6.77056e-08	1.70601
ENSG00000105509	HAS1	3.90866e-05	2.59247							ENSG00000228327	NA	6.20819e-08	1.21028
ENSG00000182230	NA	4.46478e-05	1.35435							ENSG00000187838	PLSCR3	8.00187e-08	1.51957
ENSG00000177494	ZBED2	4.55139e-05	1.1094							ENSG00000214826	NA	8.82867e-08	1.10417
ENSG00000109805	NCAPG	4.88305e-05	1.04324							ENSG00000237017	NA	1.12745e-07	1.08142
ENSG00000168078	PBK	4.78121e-05	1.06874							ENSG00000107593	PKD2L1	1.57874e-07	1.04572
ENSG00000257489	NA	4.11568e-05	1.04187							ENSG00000126353	CCR7	1.89204e-07	1.17574
ENSG00000118557	PMFBP1	5.10998e-05	1.10596							ENSG00000153253	SCN3A	2.08927e-07	1.1308
ENSG00000126353	CCR7	5.08805e-05	1.183							ENSG00000260711	NA	1.90904e-07	1.06974
ENSG00000244480	NA	5.85051e-05	1.62512							ENSG00000128683	GAD1	2.15563e-07	1.01024
ENSG00000172602	RND1	6.09925e-05	1.55489							ENSG00000053438	NNAT	2.27513e-07	1.01373
ENSG00000143476	DTL	6.90395e-05	1.17468							ENSG00000106089	STX1A	1.5727e-07	1.00723
ENSG00000274383	NA	6.84809e-05	1.30256							ENSG00000187984	NA	3.25891e-07	1.51559
ENSG00000205959	NA	7.35195e-05	1.12434							ENSG00000143367	TUFT1	1.67802e-07	1.22749
ENSG00000116883	NA	7.76319e-05	1.20838							ENSG00000187024	PTRH1	3.28728e-07	1.04107
ENSG00000244932	NA	7.7774e-05	1.01752							ENSG00000205959	NA	3.83287e-07	1.1291
ENSG00000042062	RIPOR3	9.3107e-05	1.05569							ENSG00000280109	PLAC4	3.6733e-07	1.0426
ENSG00000104368	PLAT	6.53884e-05	1.21587							ENSG00000170509	HSD17B13	3.49553e-07	-1.01275
ENSG00000260261	NA	0.000105809	1.16264							ENSG00000181409	AATK	4.85753e-07	1.17913
ENSG00000101187	SLCO4A1	0.000107224	1.45869							ENSG00000185829	ARL17A	5.32631e-07	1.05866
ENSG00000249626	NA	0.000120268	1.04059							ENSG00000199753	SNORD104	9.12947e-07	1.22208
ENSG00000187024	PTRH1	0.000111016	1.00598							ENSG00000172602	RND1	9.19199e-07	1.34082
ENSG00000160182	TFF1	0.000146156	1.16303							ENSG00000142303	ADAMTS10	1.08942e-06	1.61816
ENSG00000003137	CYP26B1	0.000154505	2.53093							ENSG00000242588	NA	1.00849e-06	1.05141
ENSG00000249267	LINC00939	0.000164175	1.25332							ENSG00000260257	LOC119746555	1.27795e-06	1.1431
ENSG00000234459	NA	0.000170729	1.03894							ENSG00000261787	TCF24	1.3316e-06	1.0254
ENSG00000246575	NA	0.00017756	1.10964							ENSG00000173404	INSM1	1.32096e-06	1.06057
ENSG00000115353	TACR1	0.000176671	1.12791							ENSG00000283268	TEX54	1.95067e-06	2.46296
ENSG00000100311	PDGFB	0.000181956	1.14291							ENSG00000042062	RIPOR3	2.30301e-06	1.00597
ENSG00000075218	GTSE1	0.00020407	1.05247							ENSG00000224060	NA	2.41272e-06	2.02949
ENSG00000138778	CENPE	0.000208864	1.06786							ENSG00000100311	PDGFB	3.15578e-06	1.11155
ENSG00000180383	DEFB124	0.000239899	1.04282							ENSG00000185338	SOCS1	3.84956e-06	1.00206
ENSG00000228327	NA	0.000199162	1.00387							ENSG00000115414	FN1	2.01124e-06	1.33828
ENSG00000280063	NA	0.000266013	1.09108							ENSG00000108342	CSF3	3.69802e-06	2.3309
ENSG00000187838	PLSCR3	0.000327958	1.2198							ENSG00000249267	LINC00939	4.83753e-06	1.27715
ENSG00000108342	CSF3	0.000304163	2.75933							ENSG00000125538	IL1B	7.45527e-06	1.73711
ENSG00000232344	LOC100419436	0.000362401	1.28585							ENSG00000173805	HAP1	1.21505e-05	1.40438
ENSG00000244094	SPRR2F	0.000509092	1.51894							ENSG00000122641	INHBA	1.24712e-05	1.18563
ENSG00000283268	TEX54	0.000637226	2.30916							ENSG00000221819	GAS8-AS1	2.3394e-05	1.61227
ENSG00000163209	SPRR3	0.000476188	1.06195							ENSG00000148926	ADM	1.45283e-05	1.13013
ENSG00000109511	ANXA10	0.000783952	1.77137							ENSG00000100985	MMP9	1.08852e-05	1.3702
ENSG00000221819	GAS8-AS1	0.000868068	1.6336							ENSG00000261490	NA	3.55727e-05	1.30644
ENSG00000177374	HIC1	0.000722172	1.23986							ENSG00000280143	NA	4.06943e-05	1.1359
ENSG00000232411	NA	0.00128932	1.11911							ENSG00000138615	CILP	5.58234e-05	1.00296
ENSG00000115414	FN1	0.000541289	1.2995							ENSG00000236397	NA	0.00010565	1.09111
ENSG00000138615	CILP	0.00154508	1.02785							ENSG00000274286	ADRA2B	0.000533498	1.04889
ENSG00000224060	NA	0.00200904	1.48314							ENSG00000123201	NA	0.000864395	1.19399
ENSG00000122641	INHBA	0.00176115	1.13173							ENSG00000232730	NA	0.00219059	1.68085
ENSG00000187984	NA	0.00255396	1.01179							ENSG00000196436	NPIPB15	0.0025904	1.2836
ENSG00000115009	CCL20	0.00253293	1.3966							ENSG00000095596	CYP26A1	0.00336995	-1.24858
ENSG00000261490	NA	0.00464638	1.13247
ENSG00000170961	HAS2	0.00902279	1.51414
ENSG00000140274	DUOXA2	0.00901691	1.11265
ENSG00000123201	NA	0.0136159	1.0461
ENSG00000202538	RNU4-2	0.0324025	1.64996
ENSG00000232730	NA	0.0305556	1.39893
ENSG00000163735	CXCL5	0.0199599	1.0148
ENSG00000280850	NA	0.0318246	1.12489

## Sheet: E5 HBEC Clusters
Table E5. Gene clusters from the heatmap of genes differentially expressed in HBECs exposed to vaped commercial ∆8-THC analyzed by product type (Figure 4B).
Cluster 1		Cluster 2		Cluster 3		Cluster 4		Cluster 5		Cluster 6
Ensemble Gene ID	Gene Name	Ensemble Gene ID	Gene Name	Ensemble Gene ID	Gene Name	Ensemble Gene ID	Gene Name	Ensemble Gene ID	Gene Name	Ensemble Gene ID	Gene Name
ENSG00000174099	MSRB3	ENSG00000183856	IQGAP3	ENSG00000145934	TENM2	ENSG00000183963	SMTN	ENSG00000117507	NA	ENSG00000168477	TNXB
ENSG00000112182	BACH2	ENSG00000135451	TROAP	ENSG00000095970	TREM2	ENSG00000139880	CDH24	ENSG00000163735	CXCL5	ENSG00000129204	USP6
ENSG00000120457	KCNJ5	ENSG00000013810	TACC3	ENSG00000177494	ZBED2	ENSG00000178919	FOXE1	ENSG00000168542	COL3A1	ENSG00000280850	NA
ENSG00000117016	RIMS3	ENSG00000167900	TK1	ENSG00000143631	FLG	ENSG00000131746	TNS4	ENSG00000229900	NA	ENSG00000257800	NA
ENSG00000159784	FAM131B	ENSG00000122952	ZWINT	ENSG00000179593	ALOX15B	ENSG00000279806	NA	ENSG00000115009	CCL20	ENSG00000085514	PILRA
ENSG00000101445	PPP1R16B	ENSG00000134222	PSRC1	ENSG00000047936	ROS1	ENSG00000162757	C1orf74	ENSG00000117983	MUC5B	ENSG00000223705	NSUN5P1
ENSG00000163121	NEURL3	ENSG00000111665	CDCA3	ENSG00000167656	LY6D	ENSG00000148600	CDHR1	ENSG00000161791	FMNL3	ENSG00000270605	NA
ENSG00000142686	C1orf216	ENSG00000127564	PKMYT1	ENSG00000082074	FYB1	ENSG00000181790	ADGRB1	ENSG00000264785	NA	ENSG00000106089	STX1A
ENSG00000110660	SLC35F2	ENSG00000166803	PCLAF	ENSG00000134757	DSG3	ENSG00000161647	MPP3	ENSG00000117318	ID3	ENSG00000066230	SLC9A3
ENSG00000096060	FKBP5	ENSG00000175305	CCNE2	ENSG00000128510	CPA4	ENSG00000101187	SLCO4A1	ENSG00000183091	NEB	ENSG00000142303	ADAMTS10
ENSG00000245848	CEBPA	ENSG00000165244	ZNF367	ENSG00000124143	ARHGAP40	ENSG00000173805	HAP1	ENSG00000140274	DUOXA2	ENSG00000154134	ROBO3
ENSG00000265972	TXNIP	ENSG00000189057	FAM111B	ENSG00000011028	MRC2	ENSG00000197558	SSPOP	ENSG00000099251	NA	ENSG00000163354	DCST2
ENSG00000140450	ARRDC4	ENSG00000121152	NCAPH	ENSG00000170465	KRT6C	ENSG00000176700	NA	ENSG00000205502	C2CD4B	ENSG00000163357	DCST1
ENSG00000167074	TEF	ENSG00000276043	UHRF1	ENSG00000186847	KRT14	ENSG00000185291	IL3RA	ENSG00000143878	RHOB	ENSG00000107593	PKD2L1
ENSG00000109084	TMEM97	ENSG00000100526	CDKN3	ENSG00000205420	KRT6A	ENSG00000275216	NA	ENSG00000127528	KLF2	ENSG00000179698	WDR97
ENSG00000181754	AMIGO1	ENSG00000134690	CDCA8	ENSG00000125538	IL1B	ENSG00000166535	A2ML1	ENSG00000227220	NA	ENSG00000205959	NA
ENSG00000165821	SALL2	ENSG00000138180	CEP55	ENSG00000136688	IL36G	ENSG00000206077	ZDHHC11B	ENSG00000180730	SHISA2	ENSG00000178623	GPR35
ENSG00000064218	DMRT3	ENSG00000089685	BIRC5	ENSG00000139289	PHLDA1	ENSG00000187583	PLEKHN1	ENSG00000276710	CSPG4P10	ENSG00000244242	IFITM10
ENSG00000175606	TMEM70	ENSG00000198826	ARHGAP11A	ENSG00000124882	EREG	ENSG00000199753	SNORD104	ENSG00000186715	MST1L	ENSG00000188004	SNHG28
ENSG00000162396	PARS2	ENSG00000156970	BUB1B	ENSG00000115008	IL1A	ENSG00000203896	LIME1	ENSG00000255160	NA	ENSG00000215644	GCGR
ENSG00000229544	NKX1-2	ENSG00000168078	PBK	ENSG00000115353	TACR1	ENSG00000283268	TEX54	ENSG00000185829	ARL17A	ENSG00000269621	NA
ENSG00000225630	MTND2P28	ENSG00000111206	FOXM1	ENSG00000115414	FN1	ENSG00000188015	S100A3	ENSG00000274602	NA	ENSG00000162779	AXDND1
ENSG00000198840	ND3	ENSG00000137804	NUSAP1	ENSG00000122641	INHBA	ENSG00000242349	NA	ENSG00000186204	CYP4F12	ENSG00000180383	DEFB124
ENSG00000198763	ND2	ENSG00000145386	CCNA2	ENSG00000260807	CEROX1	ENSG00000197953	AADACL2	ENSG00000120875	DUSP4	ENSG00000129991	TNNI3
ENSG00000076003	MCM6	ENSG00000112984	KIF20A	ENSG00000237669	NA	ENSG00000246575	NA	ENSG00000172602	RND1	ENSG00000274272	NA
ENSG00000180739	S1PR5	ENSG00000131747	TOP2A	ENSG00000204622	NA	ENSG00000173295	FAM86B3P	ENSG00000163734	CXCL3	ENSG00000149781	FERMT3
ENSG00000128268	MGAT3	ENSG00000148773	MKI67	ENSG00000145824	CXCL14	ENSG00000276409	CCL14	ENSG00000108342	CSF3	ENSG00000228314	NA
ENSG00000250899	NA	ENSG00000066279	ASPM	ENSG00000170961	HAS2	ENSG00000187609	EXD3	ENSG00000093134	NA	ENSG00000215559	NA
ENSG00000099194	SCD	ENSG00000171848	RRM2	ENSG00000003137	CYP26B1	ENSG00000186301	NA	ENSG00000118523	CCN2	ENSG00000275895	LOC102724594
ENSG00000210191	NA	ENSG00000123485	HJURP	ENSG00000103044	HAS3	ENSG00000143434	SEMA6C	ENSG00000111912	NCOA7	ENSG00000197847	NA
ENSG00000210176	NA	ENSG00000237649	KIFC1	ENSG00000177374	HIC1	ENSG00000167524	RSKR	ENSG00000107968	MAP3K8	ENSG00000133246	PRAM1
ENSG00000210184	NA	ENSG00000178999	AURKB	ENSG00000171401	KRT13	ENSG00000205702	LOC105377203	ENSG00000144802	NFKBIZ	ENSG00000206561	COLQ
ENSG00000210194	NA	ENSG00000142945	KIF2C	ENSG00000247844	NA	ENSG00000206417	NA	ENSG00000163874	ZC3H12A	ENSG00000085552	IGSF9
ENSG00000210164	NA	ENSG00000129195	PIMREG	ENSG00000178726	THBD	ENSG00000184441	NA	ENSG00000169252	ADRB2	ENSG00000214694	ARHGEF33
ENSG00000210140	NA	ENSG00000075218	GTSE1	ENSG00000163207	IVL	ENSG00000102878	HSF4	ENSG00000081320	STK17B	ENSG00000100311	PDGFB
ENSG00000210135	NA	ENSG00000175063	UBE2C	ENSG00000152137	HSPB8	ENSG00000173531	MST1	ENSG00000148926	ADM	ENSG00000127129	EDN2
ENSG00000210144	NA	ENSG00000163808	KIF15	ENSG00000198535	C2CD4A	ENSG00000250067	YJEFN3	ENSG00000164690	SHH	ENSG00000260711	NA
ENSG00000209082	NA	ENSG00000080986	NDC80	ENSG00000136689	IL1RN	ENSG00000261286	ATP2C2-AS1	ENSG00000169474	SPRR1A	ENSG00000244480	NA
ENSG00000198899	ATP6	ENSG00000198901	PRC1	ENSG00000169469	SPRR1B	ENSG00000196296	ATP2A1	ENSG00000111432	FZD10	ENSG00000255093	NA
ENSG00000228253	ATP8	ENSG00000138778	CENPE	ENSG00000143546	S100A8	ENSG00000178821	TMEM52	ENSG00000244094	SPRR2F	ENSG00000260337	NA
ENSG00000212907	ND4L	ENSG00000143228	NUF2	ENSG00000140519	RHCG	ENSG00000274627	NA	ENSG00000075702	WDR62	ENSG00000214826	NA
ENSG00000198786	ND5	ENSG00000169607	CKAP2L	ENSG00000163216	SPRR2D	ENSG00000180089	TMEM86B	ENSG00000104368	PLAT	ENSG00000283445	NA
ENSG00000198888	ND1	ENSG00000088325	TPX2	ENSG00000053438	NNAT	ENSG00000028277	POU2F2	ENSG00000115758	ODC1	ENSG00000229951	FOSL2-AS1
ENSG00000210196	NA	ENSG00000068489	PRR11	ENSG00000099625	CBARP	ENSG00000250091	DNAH10OS	ENSG00000181649	PHLDA2	ENSG00000186567	CEACAM19
ENSG00000198712	COX2	ENSG00000109805	NCAPG	ENSG00000189120	SP6	ENSG00000225032	LOC102723566	ENSG00000198435	NRARP	ENSG00000161265	U2AF1L4
ENSG00000198695	ND6	ENSG00000090889	KIF4A	ENSG00000138061	CYP1B1	ENSG00000162753	SLC9C2	ENSG00000117407	ARTN	ENSG00000185986	NA
ENSG00000183729	NA	ENSG00000131153	GINS2	ENSG00000127533	F2RL3	ENSG00000224660	SH3BP5-AS1	ENSG00000106366	SERPINE1	ENSG00000073670	ADAM11
ENSG00000170509	HSD17B13	ENSG00000146670	CDCA5	ENSG00000128683	GAD1	ENSG00000188818	ZDHHC11	ENSG00000138623	SEMA7A	ENSG00000225889	NA
ENSG00000168309	FAM107A	ENSG00000105011	ASF1B	ENSG00000160182	TFF1	ENSG00000162006	MSLNL	ENSG00000011422	PLAUR	ENSG00000228727	SAPCD1
ENSG00000095596	CYP26A1	ENSG00000051180	RAD51	ENSG00000260001	TGFBR3L	ENSG00000104936	DMPK	ENSG00000144136	SLC20A1	ENSG00000109063	MYH3
		ENSG00000101003	GINS1	ENSG00000261150	EPPK1	ENSG00000105245	NUMBL	ENSG00000172818	OVOL1	ENSG00000197978	GOLGA6L9
		ENSG00000093009	CDC45	ENSG00000168481	LGI3	ENSG00000243696	NA	ENSG00000175505	CLCF1	ENSG00000272556	NA
		ENSG00000101057	MYBL2	ENSG00000168907	PLA2G4F	ENSG00000248592	STIMATE-MUSTN1	ENSG00000137094	DNAJB5	ENSG00000272894	NA
		ENSG00000101412	E2F1	ENSG00000197093	GAL3ST4	ENSG00000010282	HHATL	ENSG00000175602	CCDC85B	ENSG00000238039	NA
		ENSG00000176890	TYMS	ENSG00000184163	C1QTNF12	ENSG00000164049	FBXW12	ENSG00000164078	MST1R	ENSG00000140459	CYP11A1
		ENSG00000144354	CDCA7	ENSG00000105664	COMP	ENSG00000215241	LINC02449	ENSG00000105509	HAS1	ENSG00000241489	NA
		ENSG00000094804	CDC6	ENSG00000169035	KLK7	ENSG00000142748	FCN3	ENSG00000181409	AATK	ENSG00000196295	NA
		ENSG00000143476	DTL	ENSG00000159307	SCUBE1	ENSG00000142233	NTN5	ENSG00000253339	NA	ENSG00000184313	MROH7
		ENSG00000244405	ETV5	ENSG00000120093	HOXB3	ENSG00000276570	NA	ENSG00000134830	C5AR2	ENSG00000101049	SGK2
		ENSG00000175832	ETV4	ENSG00000160201	U2AF1	ENSG00000099957	P2RX6	ENSG00000232973	CYP1B1-AS1	ENSG00000164845	NA
				ENSG00000229807	XIST	ENSG00000149591	TAGLN	ENSG00000140465	CYP1A1	ENSG00000280332	NA
				ENSG00000151468	CCDC3	ENSG00000260257	LOC119746555	ENSG00000163659	TIPARP	ENSG00000091536	MYO15A
				ENSG00000187908	DMBT1	ENSG00000143387	CTSK	ENSG00000185338	SOCS1	ENSG00000272734	NA
				ENSG00000109511	ANXA10	ENSG00000181722	ZBTB20	ENSG00000145113	MUC4	ENSG00000130518	IQCN
				ENSG00000167779	IGFBP6	ENSG00000197837	H4C16	ENSG00000135723	FHOD1	ENSG00000244119	NA
				ENSG00000113361	CDH6	ENSG00000261324	NA	ENSG00000132535	DLG4	ENSG00000182109	NA
						ENSG00000279198	NA	ENSG00000105376	ICAM5	ENSG00000279141	LINC01451
						ENSG00000279407	NA	ENSG00000110169	HPX	ENSG00000006047	YBX2
						ENSG00000132326	PER2	ENSG00000185112	FAM43A	ENSG00000130653	PNPLA7
						ENSG00000179094	PER1	ENSG00000197816	CCDC180	ENSG00000225138	NA
						ENSG00000261490	NA	ENSG00000133392	MYH11	ENSG00000179979	NA
						ENSG00000126353	CCR7	ENSG00000276550	NA	ENSG00000258699	NA
						ENSG00000130701	RBBP8NL	ENSG00000241794	SPRR2A	ENSG00000078814	MYH7B
						ENSG00000176222	ZNF404	ENSG00000135253	KCP	ENSG00000241288	LINC02614
						ENSG00000143367	TUFT1	ENSG00000141682	PMAIP1	ENSG00000129757	CDKN1C
						ENSG00000280143	NA	ENSG00000100197	CYP2D6	ENSG00000169436	COL22A1
						ENSG00000177990	DPY19L2	ENSG00000087074	PPP1R15A	ENSG00000074660	SCARF1
						ENSG00000260261	NA	ENSG00000162772	ATF3	ENSG00000009950	MLXIPL
						ENSG00000203867	RBM20	ENSG00000264175	MIR3189	ENSG00000138615	CILP
						ENSG00000239665	NA	ENSG00000130513	GDF15	ENSG00000087494	PTHLH
						ENSG00000197768	STPG3	ENSG00000135477	KRT87P	ENSG00000176907	TCIM
						ENSG00000206344	HCG27	ENSG00000163739	CXCL1	ENSG00000111788	NA
						ENSG00000225855	RUSC1-AS1	ENSG00000169429	CXCL8	ENSG00000233392	UICLM
						ENSG00000166126	AMN	ENSG00000136244	IL6	ENSG00000237674	NA
						ENSG00000167701	GPT	ENSG00000128342	LIF	ENSG00000186510	CLCNKA
						ENSG00000227232	NA	ENSG00000185022	MAFF	ENSG00000110455	ACCS
						ENSG00000218416	GPC1-AS1	ENSG00000081041	CXCL2	ENSG00000138316	ADAMTS14
						ENSG00000242086	SDHAP2	ENSG00000118503	TNFAIP3	ENSG00000188738	FSIP2
						ENSG00000234771	NA	ENSG00000119508	NR4A3	ENSG00000255745	LOC124902897
						ENSG00000154263	ABCA10	ENSG00000073756	PTGS2	ENSG00000198039	ZNF273
						ENSG00000196912	ANKRD36B	ENSG00000057657	PRDM1	ENSG00000232411	NA
						ENSG00000154258	ABCA9	ENSG00000145283	SLC10A6	ENSG00000258676	NA
						ENSG00000255026	NA	ENSG00000139318	DUSP6	ENSG00000153253	SCN3A
						ENSG00000169085	VXN	ENSG00000203814	H2BC18	ENSG00000173404	INSM1
						ENSG00000130702	LAMA5	ENSG00000205885	C1RL-AS1	ENSG00000202538	RNU4-2
						ENSG00000188130	MAPK12	ENSG00000101115	SALL4	ENSG00000269275	NA
						ENSG00000185864	NPIPB4	ENSG00000249601	NA	ENSG00000101194	SLC17A9
						ENSG00000005206	SPPL2B	ENSG00000204177	NA	ENSG00000042062	RIPOR3
						ENSG00000215788	TNFRSF25	ENSG00000118557	PMFBP1	ENSG00000100968	NFATC4
						ENSG00000196123	MATCAP1	ENSG00000223401	NA	ENSG00000251364	SYT9-AS1
						ENSG00000177595	PIDD1	ENSG00000178038	ALS2CL	ENSG00000204172	AGAP9
						ENSG00000167702	KIFC2	ENSG00000265982	NA	ENSG00000244879	NA
						ENSG00000103168	TAF1C	ENSG00000255847	NA	ENSG00000231160	NA
						ENSG00000185101	ANO9	ENSG00000283259	NA	ENSG00000124440	HIF3A
						ENSG00000170049	KCNAB3	ENSG00000184465	WDR27	ENSG00000182230	NA
						ENSG00000263934	NA	ENSG00000158163	DZIP1L	ENSG00000236397	NA
						ENSG00000260467	NA	ENSG00000269091	NA	ENSG00000249267	LINC00939
						ENSG00000186166	CENATAC	ENSG00000170629	NA	ENSG00000249816	LINC00964
						ENSG00000137817	PARP6	ENSG00000170074	FAM153A	ENSG00000232730	NA
						ENSG00000139631	CSAD	ENSG00000213366	GSTM2	ENSG00000224060	NA
						ENSG00000114270	COL7A1	ENSG00000245532	NEAT1	ENSG00000123201	NA
						ENSG00000138834	MAPK8IP3	ENSG00000262580	NA	ENSG00000274286	ADRA2B
						ENSG00000261505	NA	ENSG00000184925	LCN12	ENSG00000187984	NA
						ENSG00000182841	NA	ENSG00000259820	NA	ENSG00000110680	CALCA
						ENSG00000167280	ENGASE	ENSG00000257671	KRT7-AS	ENSG00000196436	NPIPB15
						ENSG00000131584	ACAP3	ENSG00000119714	GPR68
						ENSG00000164877	MICALL2	ENSG00000267416	HEATR6-DT
						ENSG00000127415	IDUA	ENSG00000279602	NA
						ENSG00000160072	ATAD3B	ENSG00000078401	EDN1
						ENSG00000142102	PGGHG	ENSG00000235027	PRADX
						ENSG00000272752	STAG3L5P-PVRIG2P-PILRB	ENSG00000226145	NA
						ENSG00000205560	CPT1B	ENSG00000203799	CCDC162P
						ENSG00000105717	PBX4	ENSG00000179532	DNHD1
						ENSG00000131591	C1orf159	ENSG00000249715	FER1L5
						ENSG00000197119	SLC25A29	ENSG00000132530	XAF1
						ENSG00000168010	ATG16L2	ENSG00000137801	THBS1
						ENSG00000224975	INE1	ENSG00000230387	LINC03125
						ENSG00000213347	MXD3	ENSG00000278662	GOLGA6L4
						ENSG00000177202	SPACA4	ENSG00000160766	NA
						ENSG00000145040	UCN2	ENSG00000261659	NA
						ENSG00000196739	COL27A1	ENSG00000187642	PERM1
						ENSG00000226332	NA	ENSG00000167604	NFKBID
						ENSG00000265690	NA	ENSG00000272512	NA
						ENSG00000149527	PLCH2	ENSG00000214193	SH3D21
						ENSG00000243284	VSIG8	ENSG00000095752	IL11
						ENSG00000171680	PLEKHG5	ENSG00000222009	BTBD19
						ENSG00000108773	KAT2A	ENSG00000143382	ADAMTSL4
						ENSG00000127586	CHTF18	ENSG00000164949	GEM
						ENSG00000228748	NA	ENSG00000141232	TOB1
						ENSG00000228315	GUSBP11	ENSG00000198355	PIM3
						ENSG00000186648	CARMIL3	ENSG00000280162	NA
						ENSG00000138109	CYP2C9	ENSG00000185650	ZFP36L1
						ENSG00000100068	NA	ENSG00000075426	FOSL2
						ENSG00000264772	NA	ENSG00000162891	IL20
						ENSG00000213782	DDX47	ENSG00000114315	HES1
						ENSG00000124593	NA	ENSG00000163660	CCNL1
						ENSG00000204149	AGAP6	ENSG00000184545	DUSP8
						ENSG00000229152	NA	ENSG00000123358	NR4A1
						ENSG00000263345	NA	ENSG00000125740	FOSB
						ENSG00000279569	NA	ENSG00000259884	NR4A1AS
						ENSG00000143630	HCN3	ENSG00000108551	RASD1
						ENSG00000277476	NA	ENSG00000067082	KLF6
						ENSG00000259972	NA	ENSG00000160888	IER2
						ENSG00000134253	TRIM45	ENSG00000159388	BTG2
						ENSG00000056558	TRAF1	ENSG00000128016	ZFP36
						ENSG00000133466	C1QTNF6	ENSG00000170345	FOS
						ENSG00000085465	OVGP1	ENSG00000120129	DUSP1
						ENSG00000167874	TMEM88	ENSG00000177606	JUN
						ENSG00000128383	APOBEC3A	ENSG00000119986	AVPI1
						ENSG00000204248	COL11A2	ENSG00000134107	BHLHE40
						ENSG00000250602	NA	ENSG00000208028	MIR616
						ENSG00000162241	SLC25A45	ENSG00000169231	THBS3
						ENSG00000224251	NA	ENSG00000025708	TYMP
						ENSG00000188747	NOXA1	ENSG00000226380	NA
						ENSG00000167302	TEPSIN	ENSG00000267322	SCARNA17
						ENSG00000250295	RDH10-AS1	ENSG00000116285	ERRFI1
						ENSG00000267519	NA	ENSG00000148339	SLC25A25
						ENSG00000261884	NA	ENSG00000144655	CSRNP1
						ENSG00000142178	SIK1	ENSG00000238279	NA
						ENSG00000229413	NA	ENSG00000249007	NA
						ENSG00000167549	CORO6	ENSG00000268812	LIF-AS2
						ENSG00000269353	NA	ENSG00000185950	IRS2
						ENSG00000280195	NA	ENSG00000171223	JUNB
						ENSG00000125503	PPP1R12C	ENSG00000120738	EGR1
						ENSG00000197989	SNHG12	ENSG00000137331	IER3
						ENSG00000212123	PRR22	ENSG00000138166	DUSP5
						ENSG00000213780	GTF2H4	ENSG00000158050	DUSP2
						ENSG00000257270	NA	ENSG00000275993	LOC102724428
						ENSG00000092929	UNC13D	ENSG00000122877	EGR2
						ENSG00000184381	PLA2G6	ENSG00000125968	ID1
						ENSG00000267344	NA	ENSG00000184557	SOCS3
						ENSG00000169660	HEXD	ENSG00000099860	GADD45B
						ENSG00000102287	GABRE	ENSG00000172349	IL16
						ENSG00000158286	RNF207	ENSG00000074855	ANO8
						ENSG00000135976	ANKRD36	ENSG00000026036	RTEL1-TNFRSF6B
						ENSG00000215769	ARHGAP27P1-BPTFP1-KPNA2P3	ENSG00000258388	PPT2-EGFL8
						ENSG00000204681	GABBR1	ENSG00000187961	KLHL17
						ENSG00000265298	NA	ENSG00000267049	NA
						ENSG00000007392	LUC7L	ENSG00000062716	VMP1
						ENSG00000113108	APBB3	ENSG00000272256	NA
						ENSG00000146067	FAM193B	ENSG00000204618	RNF39
						ENSG00000177943	MAMDC4	ENSG00000142871	CCN1
						ENSG00000214176	NA	ENSG00000270069	NA
						ENSG00000261408	TEN1-CDK3	ENSG00000136997	MYC
						ENSG00000264577	NA	ENSG00000117525	F3
						ENSG00000102886	GDPD3	ENSG00000146592	CREB5
						ENSG00000268945	NA	ENSG00000198753	PLXNB3
						ENSG00000224593	RPL21P72	ENSG00000185215	TNFAIP2
						ENSG00000182685	BRICD5	ENSG00000122861	PLAU
						ENSG00000235831	BHLHE40-AS1	ENSG00000154734	ADAMTS1
						ENSG00000260428	SCX	ENSG00000222047	C10orf55
						ENSG00000139636	LMBR1L	ENSG00000125845	BMP2
						ENSG00000221978	CCNL2	ENSG00000175906	ARL4D
						ENSG00000146830	GIGYF1	ENSG00000152518	ZFP36L2
						ENSG00000196337	CGB7	ENSG00000167470	MIDN
						ENSG00000213398	LCAT	ENSG00000069399	BCL3
						ENSG00000161960	EIF4A1	ENSG00000128422	KRT17
						ENSG00000012171	SEMA3B	ENSG00000112715	VEGFA
						ENSG00000117425	PTCH2	ENSG00000198576	ARC
						ENSG00000151224	MAT1A	ENSG00000153234	NR4A2
						ENSG00000257524	NA	ENSG00000142627	EPHA2
						ENSG00000173846	PLK3	ENSG00000198517	MAFK
						ENSG00000142959	BEST4	ENSG00000177426	TGIF1
						ENSG00000183484	GPR132	ENSG00000227300	NA
						ENSG00000149927	DOC2A	ENSG00000175592	FOSL1
						ENSG00000135702	CHST5	ENSG00000109321	AREG
						ENSG00000265018	NA	ENSG00000113070	HBEGF
						ENSG00000116883	NA	ENSG00000179388	EGR3
						ENSG00000166924	NYAP1	ENSG00000148841	ITPRIP
						ENSG00000008710	PKD1	ENSG00000136826	KLF4
						ENSG00000154358	OBSCN	ENSG00000173334	TRIB1
						ENSG00000281490	NA	ENSG00000137193	PIM1
						ENSG00000260404	NA	ENSG00000214822	NA
						ENSG00000137877	SPTBN5	ENSG00000214856	NA
						ENSG00000270015	NA	ENSG00000157557	ETS2
						ENSG00000144045	DQX1	ENSG00000160471	COX6B2
						ENSG00000239831	NA	ENSG00000188290	HES4
						ENSG00000255031	NA	ENSG00000186832	KRT16
						ENSG00000230453	ANKRD18B	ENSG00000175197	DDIT3
						ENSG00000160781	PAQR6	ENSG00000187479	C11orf96
						ENSG00000243708	PLA2G4B	ENSG00000005001	PRSS22
						ENSG00000205517	RGL3	ENSG00000163209	SPRR3
						ENSG00000072195	SPEG
						ENSG00000151376	ME3
						ENSG00000198106	NA
						ENSG00000236384	LINC00479
						ENSG00000167971	CASKIN1
						ENSG00000203761	NA
						ENSG00000086159	AQP6
						ENSG00000197182	MIRLET7BHG
						ENSG00000184205	TSPYL2
						ENSG00000228526	MIR34AHG
						ENSG00000230928	NA
						ENSG00000259865	NA
						ENSG00000163126	ANKRD23
						ENSG00000283189	NA
						ENSG00000272578	NA
						ENSG00000258727	AP1G2-AS1
						ENSG00000196696	PDXDC2P-NPIPB14P
						ENSG00000167676	PLIN4
						ENSG00000261488	TBILA
						ENSG00000269821	KCNQ1OT1
						ENSG00000100288	CHKB
						ENSG00000279328	LOC124906280
						ENSG00000188234	AGAP4
						ENSG00000243679	NA
						ENSG00000230715	NA
						ENSG00000152117	NA
						ENSG00000266714	MYO15B
						ENSG00000242861	NA
						ENSG00000134884	ARGLU1
						ENSG00000185946	RNPC3
						ENSG00000179406	LINC00174
						ENSG00000198625	MDM4
						ENSG00000139625	MAP3K12
						ENSG00000240038	AMY2B
						ENSG00000180902	D2HGDH
						ENSG00000204410	MSH5
						ENSG00000279382	NA
						ENSG00000272078	NA
						ENSG00000069493	CLEC2D
						ENSG00000254413	CHKB-CPT1B
						ENSG00000185482	STAC3
						ENSG00000270189	NA
						ENSG00000166432	ZMAT1
						ENSG00000251432	LINC02615
						ENSG00000182796	NA
						ENSG00000132424	PNISR
						ENSG00000232931	NA
						ENSG00000280063	NA
						ENSG00000114857	NKTR
						ENSG00000227671	NA
						ENSG00000166405	RIC3
						ENSG00000075826	SEC31B
						ENSG00000166762	CATSPER2
						ENSG00000274383	NA
						ENSG00000225783	MIAT
						ENSG00000236871	LINC00106
						ENSG00000236017	NA
						ENSG00000244932	NA
						ENSG00000258623	NA
						ENSG00000226696	LENG8-AS1
						ENSG00000248124	NA
						ENSG00000126790	L3HYPDH
						ENSG00000160678	S100A1
						ENSG00000131044	TTLL9
						ENSG00000235703	EOLA2-DT
						ENSG00000173209	NA
						ENSG00000187905	LRRC74B
						ENSG00000140398	NEIL1
						ENSG00000004777	ARHGAP33
						ENSG00000101104	PABPC1L
						ENSG00000214021	TTLL3
						ENSG00000167615	LENG8
						ENSG00000198563	DDX39B
						ENSG00000175265	GOLGA8A
						ENSG00000258461	NA
						ENSG00000176155	CCDC57
						ENSG00000269352	NA
						ENSG00000267244	LOC100288123
						ENSG00000108515	ENO3
						ENSG00000239388	ASB14
						ENSG00000114204	SERPINI2
						ENSG00000242687	NA
						ENSG00000132680	KHDC4
						ENSG00000160401	CFAP157
						ENSG00000273599	NA
						ENSG00000175267	VWA3A
						ENSG00000241769	EOLA1-DT
						ENSG00000238105	NA
						ENSG00000184949	FAM227A
						ENSG00000273142	NA
						ENSG00000244560	NA
						ENSG00000137496	IL18BP
						ENSG00000185513	L3MBTL1
						ENSG00000135473	PAN2
						ENSG00000246090	LOC100507053
						ENSG00000132793	LPIN3
						ENSG00000272645	NA
						ENSG00000171163	ZNF692
						ENSG00000272821	NA
						ENSG00000244161	FLNB-AS1
						ENSG00000164066	INTU
						ENSG00000142528	ZNF473
						ENSG00000280138	NA
						ENSG00000280407	NA
						ENSG00000230551	NA
						ENSG00000275888	NA
						ENSG00000259583	ALDH1A3-AS1
						ENSG00000276216	NA
						ENSG00000260729	NA
						ENSG00000225697	SLC26A6
						ENSG00000272669	NA
						ENSG00000279716	NA
						ENSG00000222019	NA
						ENSG00000279182	NA
						ENSG00000235245	NA
						ENSG00000263272	NA
						ENSG00000228274	NA
						ENSG00000240053	LY6G5B
						ENSG00000255182	NA
						ENSG00000258839	MC1R
						ENSG00000251562	MALAT1
						ENSG00000100429	HDAC10
						ENSG00000267523	NA
						ENSG00000109046	WSB1
						ENSG00000280927	CTBP1-AS
						ENSG00000279801	LOC112268198
						ENSG00000279159	NA
						ENSG00000242294	NA
						ENSG00000168970	JMJD7-PLA2G4B
						ENSG00000197774	EME2
						ENSG00000215252	GOLGA8B
						ENSG00000010310	GIPR
						ENSG00000167371	PRRT2
						ENSG00000159899	NPR2
						ENSG00000181085	MAPK15
						ENSG00000160055	TMEM234
						ENSG00000158815	FGF17
						ENSG00000162572	SCNN1D
						ENSG00000243302	NA
						ENSG00000228327	NA
						ENSG00000187775	DNAH17
						ENSG00000237017	NA
						ENSG00000233377	NA
						ENSG00000245849	RAD51-AS1
						ENSG00000228486	C2orf92
						ENSG00000080947	CROCCP3
						ENSG00000107611	CUBN
						ENSG00000214279	SCART1
						ENSG00000205890	LOC100128770
						ENSG00000273036	CYP4F33P
						ENSG00000153291	SLC25A27
						ENSG00000223745	NA
						ENSG00000130649	CYP2E1
						ENSG00000185189	NRBP2
						ENSG00000167766	ZNF83
						ENSG00000278912	NA
						ENSG00000246922	UBAP1L
						ENSG00000250990	NA
						ENSG00000260592	LOC124903659
						ENSG00000162576	MXRA8
						ENSG00000135424	ITGA7
						ENSG00000117616	RSRP1
						ENSG00000223991	TANAR
						ENSG00000095397	WHRN
						ENSG00000266106	NA
						ENSG00000265678	NA
						ENSG00000260565	NA
						ENSG00000279693	NA
						ENSG00000260285	NA
						ENSG00000217801	NA
						ENSG00000267493	CIRBP-AS1
						ENSG00000231868	NA
						ENSG00000269194	LOC105372435
						ENSG00000263050	NA
						ENSG00000260005	NA
						ENSG00000255306	NA
						ENSG00000273151	NA
						ENSG00000157306	NA
						ENSG00000264112	NA
						ENSG00000224090	LOC100129175
						ENSG00000280334	NA
						ENSG00000271895	NA
						ENSG00000250461	NA
						ENSG00000204305	AGER
						ENSG00000225828	FAM229A
						ENSG00000260563	NA
						ENSG00000234459	NA
						ENSG00000240731	NA
						ENSG00000235016	SEMA3F-AS1
						ENSG00000241404	EGFL8
						ENSG00000120458	MSANTD2
						ENSG00000187838	PLSCR3
						ENSG00000221819	GAS8-AS1
						ENSG00000242588	NA
						ENSG00000232344	LOC100419436
						ENSG00000092529	CAPN3
						ENSG00000203709	NA
						ENSG00000257489	NA
						ENSG00000176593	ZNF606-AS1
						ENSG00000114841	DNAH1
						ENSG00000167377	ZNF23
						ENSG00000169246	NPIPB3
						ENSG00000243716	NPIPB5
						ENSG00000188185	NA
						ENSG00000258472	NA
						ENSG00000188566	NDOR1
						ENSG00000130827	PLXNA3
						ENSG00000181143	MUC16
						ENSG00000271430	NA
						ENSG00000129646	QRICH2
						ENSG00000136367	ZFHX2
						ENSG00000187024	PTRH1
						ENSG00000104894	CD37
						ENSG00000280109	PLAC4
						ENSG00000235772	NA
						ENSG00000262877	NA
						ENSG00000151651	ADAM8
						ENSG00000180071	ANKRD18A
						ENSG00000253540	NA
						ENSG00000108821	COL1A1
						ENSG00000008226	DLEC1
						ENSG00000279457	NA
						ENSG00000261863	LINC01996
						ENSG00000247157	LINC01252
						ENSG00000171931	FBXW10
						ENSG00000183921	SDR42E2
						ENSG00000259605	NA
						ENSG00000267395	DM1-AS
						ENSG00000161912	NA
						ENSG00000228140	EFHD2-AS1
						ENSG00000272141	NA
						ENSG00000198976	MIR429
						ENSG00000198569	SLC34A3
						ENSG00000233198	RNF224
						ENSG00000227218	LOC124902280
						ENSG00000275734	NA
						ENSG00000268049	NA
						ENSG00000246339	EXTL3-AS1
						ENSG00000261971	LOC124900372
						ENSG00000235706	DICER1-AS1
						ENSG00000121716	PILRB
						ENSG00000213199	ASIC3
						ENSG00000259891	NA
						ENSG00000182873	PRKCZ-AS1
						ENSG00000262903	NA
						ENSG00000137070	IL11RA
						ENSG00000267078	NA
						ENSG00000242686	NA
						ENSG00000254815	LMNTD2-AS1
						ENSG00000185522	LMNTD2
						ENSG00000226562	CYP4F26P
						ENSG00000178773	CPNE7
						ENSG00000274512	TBC1D3
						ENSG00000184471	C1QTNF8
						ENSG00000274376	ADAMTS7P1
						ENSG00000162591	MEGF6
						ENSG00000249626	NA
						ENSG00000261787	TCF24
						ENSG00000105650	PDE4C
						ENSG00000100985	MMP9

## Sheet: E6 HBEC IPA
Table E6. IPA analysis of HBECs exposed to commercial ∆8-THC products analyzed by product type.
	Distillates and Disposables vs. PG/VG Vehicle Control				Juices vs. PG/VG Vehicle Control
	Name	z-score	p-value		Name	z-score	p-value
Canonical Pathways	tRNA processing in the mitochondrion	-4.3589	1.99526e-20		Cell Cycle Checkpoints	4	5.01187e-17
	Wound Healing Signaling Pathway	4.38178	7.94328e-14		Mitotic Prometaphase	3.4641	5.01187e-13
	rRNA processing	-3.60555	1.99526e-13		Mitotic G1 phase and G1/S transition	-2.52982	3.98107e-12
	NGF-stimulated transcription	3.31662	1.31826e-09		Kinetochore Metaphase Signaling Pathway	2.33333	1.25893e-11
	Mitochondrial RNA degradation	-3	3.71535e-09		Mitotic Metaphase and Anaphase	3.31662	6.30957e-11
	Pathogen Induced Cytokine Storm Signaling Pathway	5.01377	4.57088e-09		RHO GTPases Activate Formins	3	2.23872e-10
	Interleukin-10 signaling	3.31662	6.91831e-09		Kinesins	2.44949	2.23872e-08
	Hematoma Resolution Signaling Pathway	-2.85774	2.0893e-08		Synthesis of DNA	2.64575	5.49541e-08
	Pulmonary Fibrosis Idiopathic Signaling Pathway	4.6	3.01995e-08		Mitotic G2-G2/M phases	2.64575	1.58489e-06
	Atherosclerosis Signaling	3.60555	3.16228e-08		Nuclear Cytoskeleton Signaling Pathway	1.63299	3.01995e-06
Upstream Regulators	IL1B	5.419	8.53e-44		TBX3	5.385	1.98e-41
	TNF	7.366	1.01e-43		Eldr	4.437	5.91e-38
	EGF	7.13	1.84e-42		aflatoxin B1	5.385	2.06e-37
	PDGF-BB	6.833	2.18e-42		E2F4	-1.715	2.48e-33
	LY294002	-6.174	2.56e-36		CDKN1A	-3.024	1.89e-32
	U0126	-6.715	2.13e-35		l-asparaginase	-4.472	7.36e-31
	tetradecanoylphorbol acetate	7.89	5.23e-34		CCND1	3.794	3.9e-29
	HGF	5.954	2.38e-33		FOXM1	3.882	2.74e-28
	PD98059	-7.124	3.55e-33		MYOD1	3.349	4.68e-27
	GPER1	3.365	1.73e-31		PTGER2	4.123	2.06e-25
Tox Lists	Liver Proliferation	NA	1.25893e-12		Increases Liver Hyperplasia/Hyperproliferation	NA	2.45471e-06
	Cardiac Necrosis/Cell Death		3.63078e-09		p53 Signaling		0.00275423
	Acute Renal Failure Panel (Rat)		2.45471e-08		Cell Cycle: G2/M DNA Damage Checkpoint Regulation		0.00977237
	Liver Necrosis/Cell Death		5.88844e-08		Aryl Hydrocarbon Receptor Signaling		0.0151356
	Primary Glomerulonephritis Biomarker Panel (Human)		7.94328e-08		Cell Cycle: G1/S Checkpoint Regulation		0.0162181
	Increases Glomerular Injury		1.25893e-07		Renal Ischemic Resistance Panel (Rat)		0.0275423
	Cardiac Hypertrophy		6.0256e-07		Primary Glomerulonephritis Biomarker Panel (Human)		0.030903
	Increases Liver Hyperplasia/Hyperproliferation		1.1749e-06		Liver Proliferation		0.0501187
	Cardiac Fibrosis		5.01187e-06		TR/RXR Activation		0.0524807
	Cytochrome P450 Panel - Substrate is a Xenobiotic (Human)		5.49541e-06		Anti-Apoptosis		0.0870964
Diseases and Biological Functions	upper abdominal cancer	1.358	1.23e-23		MYC mutation positive B-cell lymphoma		2.95e-49
	cancer	3.988	1.59e-22		organismal death	-4.227	1.81e-27
	tumorigenesis	0.442	1.88e-22		HER2 negative hormone receptor negative breast cancer		8.3e-27
	extrapancreatic malignant tumor	2.178	3.5e-22		hepatocellular carcinoma	2.429	1.98e-24
	cancer	1.137	1.12e-21		non-small cell lung cancer		9.34e-24
	mitochondrial disorder		1.59e-21		B cell cancer		1.56e-23
	endocrine gland tumor		1.87e-21		cell cycle progression	2.872	2.16e-22
	adenocarcinoma	-0.437	2.25e-21		segregation	0.971	2.79e-22
	growth	2.991	2.34e-21		lung adenocarcinoma		3.69e-21
	neoplasia	0.386	3.37e-21		hematologic cancer	0.585	2.99e-20
Ingenuity pathway analysis (IPA) was performed on genes signficantly altered (p-value < 0.05, log2FC ≥ 1) by distillates and disposables or juices vs. the PG/VG vehicle control. The top 10 canonical pathways, tox lists, upstream regualtors, and diseases and biological functions sorted by p-value are shown. Canonical pathways and upstream regulators with non-zero z-scores were included.

## Sheet: E7 HBEC GSEA
Table E7. GSEA analysis of HBECs exposed to commercial ∆8-THC products analyzed by product type.
	Distillates and Disposables vs. PG/VG Vehicle Control				Juices vs. PG/VG Vehicle Control
	Gene Set	NES	FDR q-value		Gene Set	NES	FDR q-value
Hallmarks	TNFA signaling via NFKB	2.15544	0		G2M checkpoint	2.33861	0
	Oxidative phosphorylation	-2.54036	0		E2F targets	2.3349	0
	Protein secretion	-2.4387	0		Mitotic spindle	1.90514	0
	MYC targets V1	-2.33585	0		MYC targets V1	1.85662	0
	Androgen response	-2.30421	0		Glycolysis	1.81549	0.0002
	MTORC1 signaling	-2.2043	0		Estrogen response late	1.7719	0.000336806
	Unfolded protein response	-1.9338	0		Oxidative phosphorylation	1.74184	0.00028869
	Adipogenesis	-1.60721	0.00557414		DNA repair	1.70838	0.000505208
	Cholesterol homeostasis	-1.60855	0.00608088		Interferon alpha response	1.69786	0.0005625
	Fatty acid metabolism	-1.58621	0.0064317		Hypoxia	1.66602	0.000610505
GO	Small subunit processome	-2.82183	0		Chromosome separation	2.2737	0
	Ribosome biogenesis	-2.77155	0		Mitotic sister chromatid separation	2.25219	0
	Ribosomal small subunit biogenesis	-2.75971	0		Regulation of chromosome segregation	2.24082	0
	Ribosomal subunit	-2.75015	0		Attachment of spindle microtubules to kinetochore	2.23911	0
	Preribosome	-2.70822	0		Negative regulation of nuclear division	2.23439	0
	Large ribosomal subunit	-2.69132	0		Mitotic sister chromatid segregation	2.23158	0
	rRNA metabolic process	-2.68294	0		Negative regulation of chromosome segregation	2.22307	0
	Structural constituent of ribosome	-2.62846	0		Regulation of mitotic sister chromatid segregation	2.20427	0
	rRNA processing	-2.59042	0		Metaphase chromosome alignment	2.20256	0
	rRNA binding	-2.57357	0		Mitotic cell cycle checkpoint signaling	2.19536	0
WikiPathways	Cytoplasmic ribosomal proteins	-2.61168	0		Retinoblastoma gene in cancer	2.25505	0
	Electron transport chain OXPHOS system in mitochondria	-2.38799	0		Cell cycle	2.20362	0
	Cholesterol synthesis disorders	-2.3767	0		DNA replication	2.18835	0
	Cholesterol metabolism with Bloch and Kandutsch-Russell pathways	-2.32076	0		DNA irdamage and cellular response via ATR	2.10634	0
	Sterol regulatory element-binding proteins SREBP signaling	-2.31253	0		G1 to S cell cycle control	2.03603	0
	Mitochondrial complex IV assembly	-2.30859	0		DNA repair pathways full network	1.99446	0
	Ferroptosis	-2.30826	0		Gastric cancer network 1	1.89031	0.000294759
	Cholesterol biosynthesis pathway	-2.29912	0		DNA damage response	1.92992	0.000336867
	Metabolic reprogramming in colon cancer	-2.28323	0		ATM signaling	1.87731	0.000351103
	Oxidative phosphorylation	-2.2825	0		Cytoplasmic ribosomal proteins	1.88536	0.000390115
Gene Set Enrichment Analysis (GSEA) was performed on genes signficantly altered (p-value < 0.05, log2FC ≥ 1) by distillates and disposables or juices vs. the PG/VG vehicle control. The top 10 gene sets in the Hallmarks, GO, and WikiPathways collections sorted by FDR q-value are shown.

## Sheet: E8 Cilia Genes
Table E8. Cilia related genes altered by each ∆8-THC product.
Product	Symbol	logFC	p-value adj
Palmetto Distillate	CCDC162P	1.28024	3.34799e-11
	TTLL3	1.44712	4.69816e-11
	CROCCP3	1.33533	1.39012e-10
	CCDC57	1.03846	2.3297e-10
	DNAH10OS	1.2959	5.58354e-10
	ARL4D	1.08513	4.18036e-10
	CCDC14	1.03396	4.79778e-10
NYSW Distillate	ARL4D	1.74497	5.1131e-17
	TTLL9	1.01711	8.27378e-13
	TTLL3	1.58676	2.61614e-12
	CFAP157	1.08223	6.18054e-12
	CCDC162P	1.29561	2.04854e-11
	CCDC57	1.13326	1.85719e-11
	CROCCP3	1.37044	5.19847e-11
	DNAH10OS	1.37202	7.71796e-11
	CEP55	1.70373	4.10574e-09
	DNAH1	1.05195	1.60623e-08
	CCDC85B	1.13444	4.0006e-08
	DNAH17	1.10965	3.50109e-06
Palmetto Disposable	ARL4D	2.28336	5.39125e-22
	TTLL3	1.46336	3.80398e-11
	CCDC85B	1.44725	7.7328e-11
	CCDC57	1.06666	1.30256e-10
	CCDC162P	1.21419	1.58297e-10
	CROCCP3	1.16758	5.33807e-09
	DNAH10OS	1.16451	8.80914e-09
	CEP55	1.50024	1.12676e-07
	DNAH17	1.20729	6.65434e-07
Stiizy Disposable	ARL4D	1.58298	2.8346e-15
	TTLL3	1.37816	2.30089e-10
	DNAH10OS	1.19295	6.66311e-09
	CCDC162P	1.08214	4.54779e-09
	CROCCP3	1.00954	2.4508e-07
	CEP55	1.17897	2.01545e-05
	HSPA1A	1.11778	8.92562e-06
ST Strawberry Juice	CEP55	2.29598	8.40396e-12
	CCDC3	1.03945	2.90696e-09
ST Green Apple Juice	CEP55	2.35746	6.7234e-12
HBECs at ALI were exposed to 20 puffs commercial vaped ∆8-THC products or a PG/VG vehicle control. Significant changes in gene expression were defined as padj < 0.05 and log2FC ≥ 1.
Not for publicaiton, just random analysis
Palmetto Distillate	CCDC162P	1.28024	3.34799e-11			unique
	TTLL3	1.44712	4.69816e-11			ARL4D	1
	CROCCP3	1.33533	1.39012e-10			CCDC14	2
	CCDC57	1.03846	2.3297e-10			CCDC162P	3
	DNAH10OS	1.2959	5.58354e-10			CCDC3	4
	ARL4D	1.08513	4.18036e-10			CCDC57	5
	CCDC14	1.03396	4.79778e-10			CCDC85B	6
NYSW Distillate	ARL4D	1.74497	5.1131e-17			CEP55	7
	TTLL9	1.01711	8.27378e-13			CFAP157	8
	TTLL3	1.58676	2.61614e-12			CROCCP3	9
	CFAP157	1.08223	6.18054e-12			DNAH10OS	10
	CCDC162P	1.29561	2.04854e-11			DNAH1	11
	CCDC57	1.13326	1.85719e-11			DNAH17	12
	CROCCP3	1.37044	5.19847e-11			HSPA1A	13
	DNAH10OS	1.37202	7.71796e-11			TTLL3	14
	CEP55	1.70373	4.10574e-09			TTLL9	15
	DNAH1	1.05195	1.60623e-08
	CCDC85B	1.13444	4.0006e-08
	DNAH17	1.10965	3.50109e-06			CCDC162P
Palmetto Disposable	ARL4D	2.28336	5.39125e-22			TTLL3
	TTLL3	1.46336	3.80398e-11			CROCCP3
	CCDC85B	1.44725	7.7328e-11			CCDC57
	CCDC57	1.06666	1.30256e-10			DNAH10OS
	CCDC162P	1.21419	1.58297e-10			ARL4D
	CROCCP3	1.16758	5.33807e-09
	DNAH10OS	1.16451	8.80914e-09
	CEP55	1.50024	1.12676e-07
	DNAH17	1.20729	6.65434e-07
Stiizy Disposable	ARL4D	1.58298	2.8346e-15
	TTLL3	1.37816	2.30089e-10
	DNAH10OS	1.19295	6.66311e-09
	CCDC162P	1.08214	4.54779e-09
	CROCCP3	1.00954	2.4508e-07
	CEP55	1.17897	2.01545e-05
	HSPA1A	1.11778	8.92562e-06
ST Strawberry Juice	CEP55	2.29598	8.40396e-12
	CCDC3	1.03945	2.90696e-09
ST Green Apple Juice	CEP55	2.35746	6.7234e-12

## Sheet: E9 D8Q Overlap
Table E9. Overlapping DEGs between exposure of 16HBEs to ∆8-THCQ for 12 hours and genes dose-responsive to ∆8-THCQ in HBECs exposed to vaped ∆8-THC (top 500)
GeneID	GeneName
ENSG00000149527	PLCH2
ENSG00000162543	UBXN10
ENSG00000143365	RORC
ENSG00000008226	DLEC1
ENSG00000187492	CDHR4
ENSG00000163885	CFAP100
ENSG00000181085	MAPK15
ENSG00000160401	CFAP157
ENSG00000251562	MALAT1
ENSG00000166592	RRAD
ENSG00000184828	ZBTB7C
ENSG00000125968	ID1
ENSG00000131044	TTLL9
ENSG00000115257	PCSK4
ENSG00000105479	ODAD1
ENSG00000187905	LRRC74B
ENSG00000210184	NA
